# Supplementary material for: Evidence for a bacterial mechanism for group-specific social odors among hyenas
Source: PubMed Central journal article supplement — Sci Rep. 2012 Aug 30;2:615. doi: 10.1038/srep00615 (PMC3431069; doi:10.1038/srep00615), 2012-08-30
Supplement: srep00615-s1.pdf [file srep00615-s1.pdf]

## Evidence for a bacterial mechanism for group-specific social odors among hyenas

Kevin R. Theis, Thomas M. Schmidt and Kay E. Holekamp

**Supplementary Table S1.** Variation in the production of volatile short-chain fatty acids (SCFA) as end products of fermentation by nearest relatives of prominent bacteria inhabiting the anal scent pouches of spotted hyenas.

| Genus                             | Short-chain fatty acids |           |         |            |         |            |         |
|-----------------------------------|-------------------------|-----------|---------|------------|---------|------------|---------|
|                                   | acetic                  | propionic | butyric | isobutyric | valeric | isovaleric | caproic |
| <i>Anaerococcus</i> <sup>Ø</sup>  | -                       | m         | +       | -          | -       | -          | v       |
| <i>Anaerovorax</i> <sup>Ø</sup>   | +                       | -         | +       | -          | -       | -          | -       |
| <i>Corynebacterium</i>            | +                       | v         | -       | -          | -       | -          | -       |
| <i>Eubacterium</i> <sup>Ø</sup>   | +                       | -         | v       | v          | -       | v          | v       |
| <i>Fastidiosipila</i>             | +                       | -         | +       | -          | -       | -          | -       |
| <i>Helcococcus</i>                | +                       | -         | -       | -          | -       | -          | -       |
| <i>Porphyromonas</i> <sup>Ø</sup> | +                       | +         | +       | m          | -       | m          | -       |
| <i>Propionibacterium</i>          | +                       | +         | -       | -          | -       | -          | -       |

Ø: obligate anaerobes (others are facultative anaerobes); + : respective SCFA is a typical fermentative end product for genus members; v : production of the respective SCFA varies among genus members; m : respective SCFA is a consistent, yet minor, fermentative end product for genus members; - : respective SCFA is not a known fermentative end product for genus members<sup>1-10</sup>.

**Supplementary Table S2.** Results of ANOSIM analyses evaluating variation in the composition (Sorensen Index) and structure (Bray-Curtis Index) of scent pouch bacterial communities among spotted hyena social groups (i.e. clans) using 90 and 98% sequence similarity cutoffs for operational taxonomic unit (OTU) formation.

|                      | 90% sequence similarity cutoff |                               | 98% sequence similarity cutoff |                            |
|----------------------|--------------------------------|-------------------------------|--------------------------------|----------------------------|
|                      | Sorensen Index                 | Bray-Curtis Index             | Sorensen Index                 | Bray-Curtis Index          |
| <b>Global effect</b> | <b>R = 0.07, P = 0.193</b>     | <b>R = 0.42, P &lt; 0.001</b> | <b>R = 0.16, P = 0.040</b>     | <b>R = 0.34, P = 0.006</b> |
| SC vs. MR            | n/a                            | R = 0.98, P = 0.029           | R = 0.43, P = 0.057            | R = 0.92, P = 0.029        |
| SC vs. FT            | n/a                            | R = 0.51, P = 0.028           | R = 0.19, P = 0.085            | R = 0.41, P = 0.029        |
| SC vs. EH            | n/a                            | R = 0.43, P = 0.029           | R = 0.31, P = 0.085            | R = 0.50, P = 0.030        |
| MR vs. FT            | n/a                            | R = 0.48, P = 0.056           | R = 0.04, P = 0.371            | R = 0.34, P = 0.028        |
| MR vs. EH            | n/a                            | R = 0.01, P = 0.428           | R = -0.05, P = 0.604           | R = -0.19, P = 0.888       |
| FT vs. EH            | n/a                            | R = 0.15, P = 0.168           | R = -0.01, P = 0.516           | R = 0.06, P = 0.283        |

SC = Southern Comfort, MR = Mara River, FT = Fig Tree, EH = Emarti Hill

**Supplementary Figure S3.** Nonmetric multidimensional scaling (NMS) plots illustrating variation in the structure of scent pouch bacterial communities among hyena clans. The plots were based on the Bray-Curtis similarity index using A) 90 and B) 98% sequence similarity cutoffs. The X and Y axes were symmetrical in each plot.

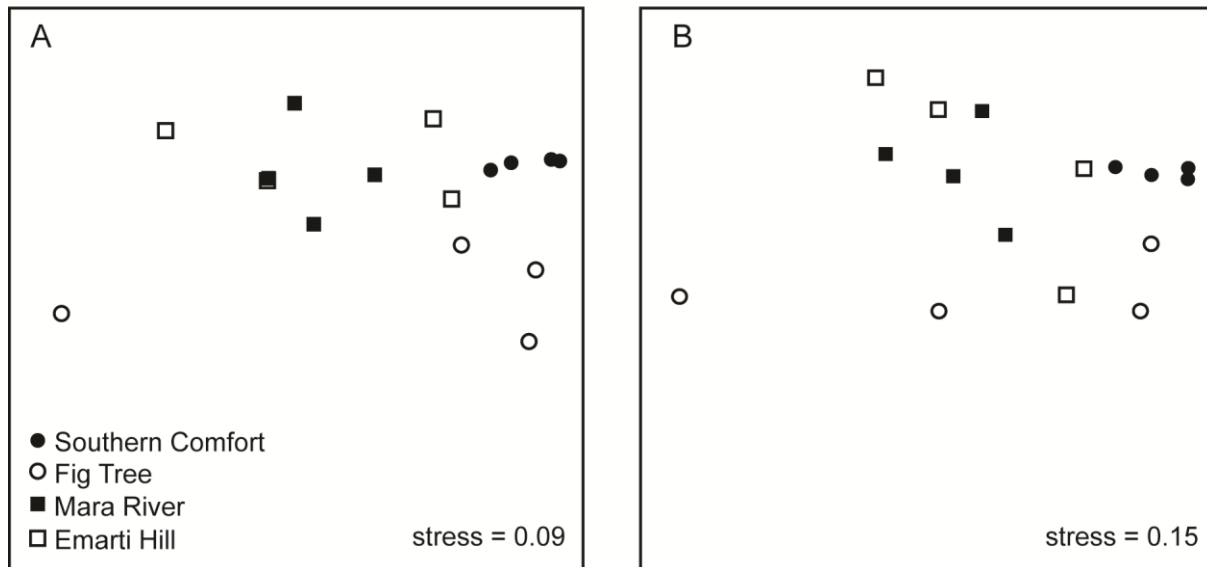

**Supplementary Figure S4.** Rarefaction curves illustrating sample coverage for the 16 sampled hyenas. To afford resolution among samples the y-axis was condensed. Therefore, to provide perspective for gauging the degree to which individual curves have plateaued, the function  $y = x$  is also shown. In other words, if the y-axis were scaled identically to the x-axis, all curves would exhibit definitive plateaus.

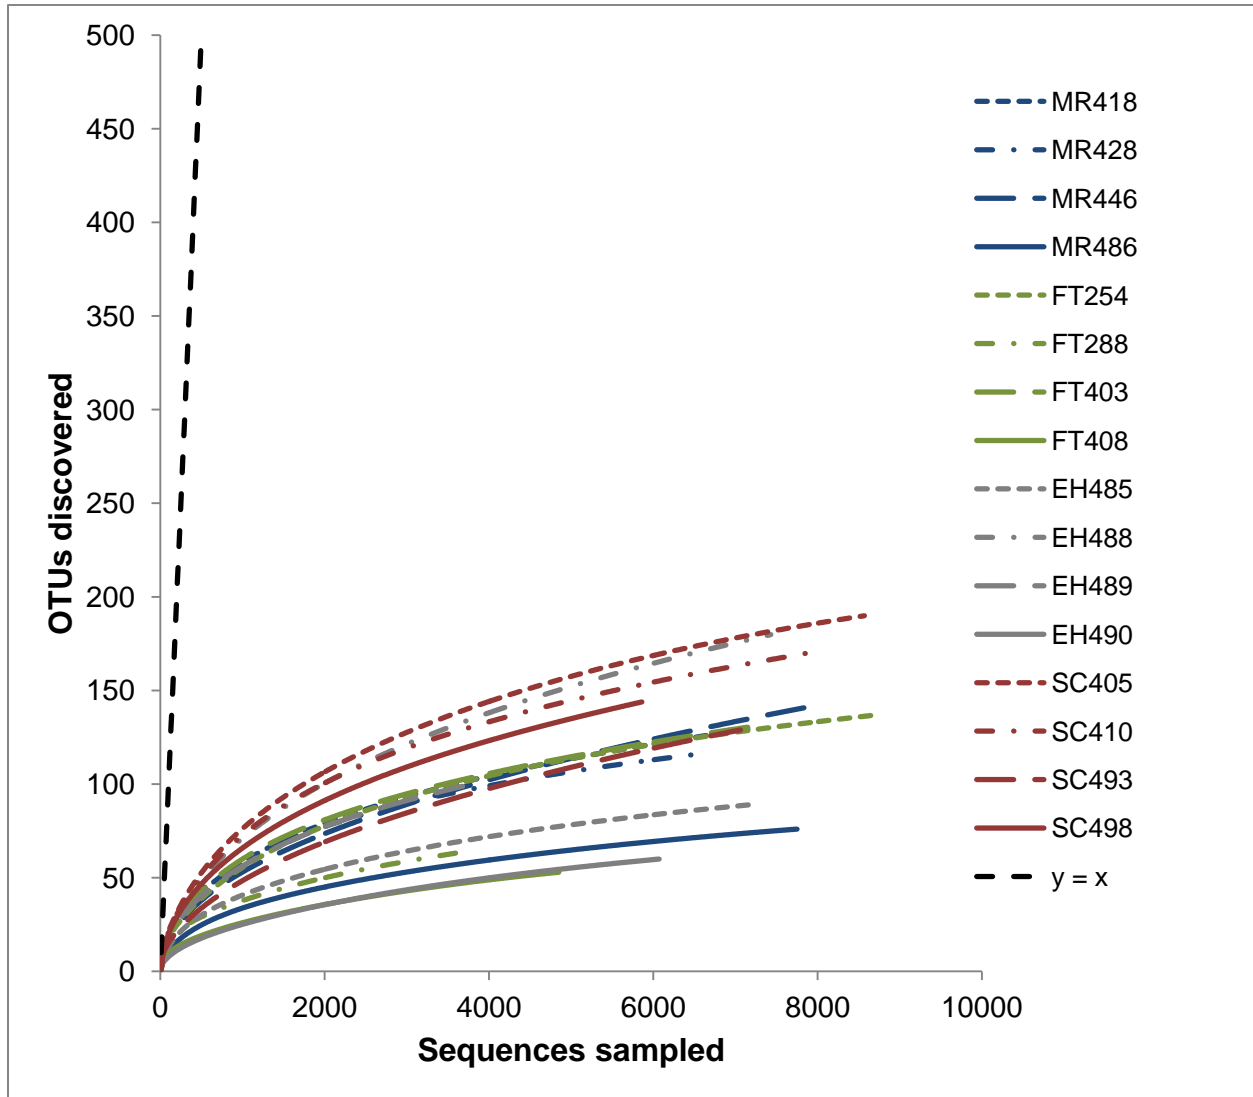

**Supplementary Information S5.** The following is a list of the dereplicated sequences for each of the 403 OTUs in this study, as well as the average percent abundance and standard deviation of each OTU among the 16 sampled spotted hyenas. All 403 sequences are available in a supplementary fasta-formatted file (S6). The sequences have also been deposited on GenBank (JX051873 - JX052266). Nine sequences were, however, filtered and removed by GenBank based on a BLAST similarity search analysis (GM2GI8201AX8K7, GM2GI8201D27UP, GM2GI8201C500Q, GM2GI8201BAHPE, GM2GI8201C61XZ, GM2GI8201C90UY, GM2GI8201D7WWN, GM2GI8201EO61I, GM2GI8201EE559). These sequences represented very minor OTUs, and the experimental removal of data associated with these OTUs did not affect analyses presented in this study.

| <b>OTU</b> | <b>Representative Sequence</b> | <b>Average percent abundance among samples</b> | <b>SD</b> |
|------------|--------------------------------|------------------------------------------------|-----------|
| 9          | GM2GI8201CQYBD                 | 24.3968                                        | 9.3868    |
| 7          | GM2GI8201CLUE0                 | 15.8818                                        | 15.5886   |
| 1          | GM2GI8201DDCSF                 | 14.1305                                        | 13.2030   |
| 6          | GM2GI8201CRBCE                 | 8.1715                                         | 10.1699   |
| 4          | GM2GI8201DNRN3                 | 6.9168                                         | 6.9241    |
| 21         | GM2GI8201ERK6Q                 | 4.8677                                         | 4.1006    |
| 63         | GM2GI8201D2HAV                 | 4.0738                                         | 6.3124    |
| 11         | GM2GI8201AYBUR                 | 2.9499                                         | 2.2596    |
| 55         | GM2GI8201DJS24                 | 2.2885                                         | 5.3527    |
| 24         | GM2GI8201EA65P                 | 2.1143                                         | 2.9485    |
| 15         | GM2GI8201EV6VM                 | 1.3198                                         | 1.5775    |
| 16         | GM2GI8201B8GJO                 | 1.2082                                         | 3.6380    |
| 65         | GM2GI8201E3146                 | 0.8697                                         | 0.9624    |
| 36         | GM2GI8201EU6AD                 | 0.8149                                         | 0.8611    |
| 5          | GM2GI8201D1JDQ                 | 0.7253                                         | 0.8000    |
| 387        | GM2GI8201EM1MO                 | 0.6121                                         | 0.8740    |
| 13         | GM2GI8201EUJNN                 | 0.3523                                         | 0.3137    |
| 14         | GM2GI8201EDE2F                 | 0.3045                                         | 0.3095    |
| 70         | GM2GI8201DKNKN                 | 0.2975                                         | 0.2406    |
| 18         | GM2GI8201DLIU2                 | 0.2743                                         | 0.1923    |
| 23         | GM2GI8201DM296                 | 0.2565                                         | 0.1543    |
| 908        | GM2GI8201DHKQV                 | 0.2466                                         | 0.9717    |
| 61         | GM2GI8201BMZIH                 | 0.2226                                         | 0.1335    |
| 1392       | GM2GI8201A3V3X                 | 0.2007                                         | 0.8028    |
| 12         | GM2GI8201C6OQV                 | 0.1852                                         | 0.1738    |
| 1068       | GM2GI8201AKMCE                 | 0.1811                                         | 0.7202    |
| 48         | GM2GI8201CL404                 | 0.1608                                         | 0.1248    |
| 44         | GM2GI8201DZ2I5                 | 0.1578                                         | 0.2837    |
| 179        | GM2GI8201BFYZP                 | 0.1493                                         | 0.5419    |
| 57         | GM2GI8201BC8L8                 | 0.1490                                         | 0.1736    |
| 115        | GM2GI8201A1FS1                 | 0.1246                                         | 0.2230    |
| 124        | GM2GI8201BCPGY                 | 0.1172                                         | 0.1034    |
| 282        | GM2GI8201C4UXV                 | 0.1157                                         | 0.2154    |
| 28         | GM2GI8201A08OI                 | 0.1138                                         | 0.1123    |
| 119        | GM2GI8201CXC6T                 | 0.1111                                         | 0.1504    |
| 74         | GM2GI8201B561P                 | 0.1073                                         | 0.1498    |

|      |                |        |        |
|------|----------------|--------|--------|
| 25   | GM2GI8201CRHFT | 0.0985 | 0.1314 |
| 85   | GM2GI8201DF482 | 0.0926 | 0.2367 |
| 429  | GM2GI8201CINU6 | 0.0920 | 0.1323 |
| 393  | GM2GI8201DWXLX | 0.0859 | 0.2703 |
| 133  | GM2GI8201EOO6X | 0.0841 | 0.1791 |
| 58   | GM2GI8201DKFTR | 0.0829 | 0.0623 |
| 892  | GM2GI8201A64RC | 0.0818 | 0.2738 |
| 459  | GM2GI8201ARFYS | 0.0797 | 0.1721 |
| 118  | GM2GI8201A5437 | 0.0793 | 0.0880 |
| 453  | GM2GI8201AOWRR | 0.0766 | 0.2171 |
| 100  | GM2GI8201A4KUJ | 0.0759 | 0.0793 |
| 160  | GM2GI8201CL55L | 0.0750 | 0.2207 |
| 90   | GM2GI8201DT1FM | 0.0750 | 0.0658 |
| 10   | GM2GI8201EVFBL | 0.0750 | 0.0663 |
| 95   | GM2GI8201CSLZF | 0.0746 | 0.0986 |
| 212  | GM2GI8201CMZRX | 0.0708 | 0.1334 |
| 22   | GM2GI8201ANBNR | 0.0686 | 0.0671 |
| 1029 | GM2GI8201DPR3F | 0.0681 | 0.2351 |
| 71   | GM2GI8201BNF2M | 0.0644 | 0.0726 |
| 210  | GM2GI8201DOPZW | 0.0599 | 0.0664 |
| 51   | GM2GI8201BM975 | 0.0567 | 0.0499 |
| 69   | GM2GI8201CQZUZ | 0.0530 | 0.0488 |
| 456  | GM2GI8201BF97J | 0.0529 | 0.1333 |
| 255  | GM2GI8201CG2XI | 0.0523 | 0.1720 |
| 214  | GM2GI8201CPQB2 | 0.0516 | 0.1779 |
| 81   | GM2GI8201DIV9G | 0.0515 | 0.0576 |
| 929  | GM2GI8201C1CUO | 0.0502 | 0.1753 |
| 41   | GM2GI8201CFEBE | 0.0483 | 0.0509 |
| 489  | GM2GI8201AXNPK | 0.0474 | 0.0615 |
| 281  | GM2GI8201D17S6 | 0.0454 | 0.0619 |
| 389  | GM2GI8201ED5ES | 0.0447 | 0.0711 |
| 56   | GM2GI8201AECWQ | 0.0437 | 0.0572 |
| 59   | GM2GI8201D3LZ3 | 0.0423 | 0.0614 |
| 1025 | GM2GI8201C4U99 | 0.0422 | 0.1644 |
| 173  | GM2GI8201EJGYV | 0.0412 | 0.1145 |
| 219  | GM2GI8201A9C88 | 0.0397 | 0.0492 |
| 906  | GM2GI8201DDH68 | 0.0382 | 0.1491 |
| 276  | GM2GI8201E2HFL | 0.0378 | 0.0850 |
| 140  | GM2GI8201AMX2Q | 0.0346 | 0.0511 |
| 157  | GM2GI8201EFF89 | 0.0336 | 0.1346 |
| 172  | GM2GI8201D1AEY | 0.0331 | 0.0701 |
| 106  | GM2GI8201BN1R8 | 0.0322 | 0.0219 |
| 82   | GM2GI8201ESY6A | 0.0317 | 0.0336 |
| 153  | GM2GI8201BB0V9 | 0.0312 | 0.0595 |
| 419  | GM2GI8201DIJFD | 0.0311 | 0.0504 |
| 149  | GM2GI8201A76FJ | 0.0299 | 0.0310 |
| 460  | GM2GI8201ES7FI | 0.0295 | 0.0852 |
| 78   | GM2GI8201A4RU1 | 0.0294 | 0.0325 |
| 49   | GM2GI8201BG5X9 | 0.0284 | 0.0472 |
| 476  | GM2GI8201DPUQN | 0.0282 | 0.0516 |
| 433  | GM2GI8201CSCVD | 0.0272 | 0.0437 |

|      |                |        |        |
|------|----------------|--------|--------|
| 177  | GM2GI8201AYBN6 | 0.0264 | 0.0685 |
| 155  | GM2GI8201BE5C4 | 0.0262 | 0.0938 |
| 321  | GM2GI8201ATG8K | 0.0259 | 0.0413 |
| 388  | GM2GI8201CHGJ1 | 0.0255 | 0.0346 |
| 905  | GM2GI8201ELOS  | 0.0254 | 0.0817 |
| 249  | GM2GI8201A4EW0 | 0.0251 | 0.0323 |
| 62   | GM2GI8201AQHJS | 0.0250 | 0.0213 |
| 181  | GM2GI8201DSG4T | 0.0248 | 0.0631 |
| 359  | GM2GI8201CXX7D | 0.0244 | 0.0328 |
| 243  | GM2GI8201CPIH1 | 0.0239 | 0.0359 |
| 275  | GM2GI8201BQOBI | 0.0234 | 0.0873 |
| 154  | GM2GI8201EU11F | 0.0233 | 0.0873 |
| 406  | GM2GI8201B5DO2 | 0.0222 | 0.0515 |
| 89   | GM2GI8201DGMIQ | 0.0219 | 0.0243 |
| 135  | GM2GI8201DQFR0 | 0.0218 | 0.0250 |
| 399  | GM2GI8201BCE7B | 0.0212 | 0.0597 |
| 83   | GM2GI8201DQ01C | 0.0211 | 0.0261 |
| 47   | GM2GI8201B6JOT | 0.0209 | 0.0316 |
| 466  | GM2GI8201BKPEV | 0.0203 | 0.0410 |
| 170  | GM2GI8201D14DN | 0.0199 | 0.0420 |
| 1398 | GM2GI8201EV3FJ | 0.0180 | 0.0720 |
| 339  | GM2GI8201BU9PV | 0.0179 | 0.0261 |
| 463  | GM2GI8201DUZC3 | 0.0178 | 0.0458 |
| 66   | GM2GI8201AQG3K | 0.0176 | 0.0203 |
| 521  | GM2GI8201AQZMR | 0.0172 | 0.0332 |
| 391  | GM2GI8201DMQL7 | 0.0166 | 0.0192 |
| 570  | GM2GI8201ASEWO | 0.0164 | 0.0333 |
| 298  | GM2GI8201B5EZ7 | 0.0162 | 0.0476 |
| 417  | GM2GI8201AX8K7 | 0.0161 | 0.0295 |
| 475  | GM2GI8201AORZA | 0.0160 | 0.0277 |
| 68   | GM2GI8201C61XZ | 0.0160 | 0.0256 |
| 357  | GM2GI8201DE239 | 0.0158 | 0.0208 |
| 293  | GM2GI8201EXS9C | 0.0158 | 0.0233 |
| 259  | GM2GI8201EUJCN | 0.0155 | 0.0301 |
| 425  | GM2GI8201DC5KE | 0.0155 | 0.0255 |
| 270  | GM2GI8201EDLQ2 | 0.0155 | 0.0250 |
| 439  | GM2GI8201B1B7W | 0.0154 | 0.0238 |
| 175  | GM2GI8201DA3X4 | 0.0151 | 0.0494 |
| 435  | GM2GI8201DRJYS | 0.0149 | 0.0247 |
| 73   | GM2GI8201DHEW3 | 0.0143 | 0.0147 |
| 253  | GM2GI8201B7CB3 | 0.0139 | 0.0155 |
| 168  | GM2GI8201CZCFH | 0.0136 | 0.0324 |
| 324  | GM2GI8201C2S5S | 0.0135 | 0.0232 |
| 317  | GM2GI8201AQAFO | 0.0134 | 0.0292 |
| 407  | GM2GI8201AGKGS | 0.0133 | 0.0269 |
| 152  | GM2GI8201CL5TR | 0.0128 | 0.0335 |
| 233  | GM2GI8201CWFM0 | 0.0128 | 0.0317 |
| 907  | GM2GI8201BH90Q | 0.0127 | 0.0406 |
| 303  | GM2GI8201CQN9D | 0.0123 | 0.0406 |
| 330  | GM2GI8201EP22Y | 0.0119 | 0.0408 |
| 346  | GM2GI8201AWESU | 0.0112 | 0.0199 |

|      |                |        |        |
|------|----------------|--------|--------|
| 310  | GM2GI8201AVIOF | 0.0112 | 0.0294 |
| 605  | GM2GI8201A7MME | 0.0110 | 0.0219 |
| 442  | GM2GI8201B3DAY | 0.0109 | 0.0167 |
| 103  | GM2GI8201D7WWN | 0.0105 | 0.0163 |
| 900  | GM2GI8201DRBK9 | 0.0104 | 0.0342 |
| 308  | GM2GI8201A1KK0 | 0.0102 | 0.0338 |
| 88   | GM2GI8201BLSVR | 0.0102 | 0.0307 |
| 166  | GM2GI8201AWYD7 | 0.0101 | 0.0295 |
| 116  | GM2GI8201E4NFQ | 0.0101 | 0.0170 |
| 493  | GM2GI8201DUD95 | 0.0100 | 0.0232 |
| 395  | GM2GI8201D0REA | 0.0099 | 0.0155 |
| 520  | GM2GI8201BVUW9 | 0.0095 | 0.0167 |
| 426  | GM2GI8201BZ8C9 | 0.0094 | 0.0180 |
| 899  | GM2GI8201AZRDJ | 0.0093 | 0.0130 |
| 468  | GM2GI8201C3BVK | 0.0093 | 0.0104 |
| 127  | GM2GI8201CEMBS | 0.0093 | 0.0135 |
| 514  | GM2GI8201BWU56 | 0.0093 | 0.0143 |
| 191  | GM2GI8201DGH1S | 0.0093 | 0.0226 |
| 1556 | GM2GI8201AM7NX | 0.0091 | 0.0261 |
| 428  | GM2GI8201BQE90 | 0.0091 | 0.0164 |
| 87   | GM2GI8201CR3F5 | 0.0090 | 0.0140 |
| 1041 | GM2GI8201B4HDO | 0.0090 | 0.0248 |
| 162  | GM2GI8201B1KG5 | 0.0089 | 0.0151 |
| 481  | GM2GI8201DDBIX | 0.0088 | 0.0256 |
| 349  | GM2GI8201DXPGR | 0.0087 | 0.0114 |
| 609  | GM2GI8201CHTF8 | 0.0087 | 0.0135 |
| 1118 | GM2GI8201D86XN | 0.0085 | 0.0232 |
| 200  | GM2GI8201EB2B4 | 0.0084 | 0.0127 |
| 499  | GM2GI8201ETZ1A | 0.0081 | 0.0182 |
| 416  | GM2GI8201D6EHD | 0.0080 | 0.0120 |
| 107  | GM2GI8201DPFUW | 0.0080 | 0.0109 |
| 502  | GM2GI8201EPNCS | 0.0079 | 0.0172 |
| 244  | GM2GI8201D4HXP | 0.0078 | 0.0129 |
| 542  | GM2GI8201D4MQN | 0.0077 | 0.0155 |
| 228  | GM2GI8201DBLPC | 0.0073 | 0.0116 |
| 1006 | GM2GI8201BSM3X | 0.0073 | 0.0230 |
| 238  | GM2GI8201ATMFP | 0.0072 | 0.0109 |
| 491  | GM2GI8201CE2GZ | 0.0072 | 0.0163 |
| 1145 | GM2GI8201DI53J | 0.0070 | 0.0207 |
| 982  | GM2GI8201EC6D6 | 0.0068 | 0.0187 |
| 526  | GM2GI8201CP1X3 | 0.0068 | 0.0118 |
| 469  | GM2GI8201AOS8H | 0.0068 | 0.0231 |
| 384  | GM2GI8201BS408 | 0.0068 | 0.0149 |
| 296  | GM2GI8201C65H1 | 0.0068 | 0.0136 |
| 246  | GM2GI8201C2IQE | 0.0068 | 0.0086 |
| 942  | GM2GI8201A8RTD | 0.0067 | 0.0145 |
| 537  | GM2GI8201AJY37 | 0.0067 | 0.0269 |
| 510  | GM2GI8201CFR8Z | 0.0067 | 0.0210 |
| 922  | GM2GI8201EW60P | 0.0066 | 0.0202 |
| 269  | GM2GI8201A54TO | 0.0066 | 0.0128 |
| 143  | GM2GI8201DQCBN | 0.0065 | 0.0090 |

|      |                |        |        |
|------|----------------|--------|--------|
| 248  | GM2GI8201CK2O7 | 0.0064 | 0.0092 |
| 313  | GM2GI8201BM73V | 0.0063 | 0.0154 |
| 525  | GM2GI8201E381L | 0.0062 | 0.0122 |
| 390  | GM2GI8201DWDE2 | 0.0061 | 0.0143 |
| 148  | GM2GI8201BJNPC | 0.0059 | 0.0083 |
| 404  | GM2GI8201BK1FF | 0.0059 | 0.0113 |
| 454  | GM2GI8201DHF5J | 0.0059 | 0.0193 |
| 938  | GM2GI8201ELV0M | 0.0059 | 0.0193 |
| 218  | GM2GI8201ARHK2 | 0.0058 | 0.0096 |
| 507  | GM2GI8201CUYIZ | 0.0058 | 0.0132 |
| 1032 | GM2GI8201DDIGV | 0.0057 | 0.0230 |
| 309  | GM2GI8201DCAMH | 0.0057 | 0.0093 |
| 53   | GM2GI8201BHXTD | 0.0056 | 0.0109 |
| 1064 | GM2GI8201DRFL4 | 0.0056 | 0.0129 |
| 226  | GM2GI8201CGJ4U | 0.0056 | 0.0189 |
| 131  | GM2GI8201EA6L4 | 0.0055 | 0.0106 |
| 484  | GM2GI8201C500Q | 0.0055 | 0.0191 |
| 449  | GM2GI8201AXSRF | 0.0055 | 0.0130 |
| 405  | GM2GI8201APMI6 | 0.0054 | 0.0097 |
| 498  | GM2GI8201D27UP | 0.0054 | 0.0097 |
| 925  | GM2GI8201BG5JN | 0.0051 | 0.0170 |
| 980  | GM2GI8201DDO61 | 0.0051 | 0.0170 |
| 195  | GM2GI8201A0WUV | 0.0050 | 0.0139 |
| 294  | GM2GI8201CX4VQ | 0.0050 | 0.0139 |
| 355  | GM2GI8201C2SJP | 0.0050 | 0.0138 |
| 474  | GM2GI8201BDSKW | 0.0049 | 0.0079 |
| 1416 | GM2GI8201CX613 | 0.0048 | 0.0193 |
| 552  | GM2GI8201B0JWB | 0.0048 | 0.0095 |
| 1027 | GM2GI8201DMU7W | 0.0048 | 0.0191 |
| 1146 | GM2GI8201DCE4X | 0.0047 | 0.0156 |
| 444  | GM2GI8201DCJWP | 0.0047 | 0.0090 |
| 272  | GM2GI8201CWUSH | 0.0047 | 0.0130 |
| 1085 | GM2GI8201DOW77 | 0.0047 | 0.0127 |
| 622  | GM2GI8201AIYEM | 0.0046 | 0.0101 |
| 445  | GM2GI8201BL8EF | 0.0046 | 0.0120 |
| 413  | GM2GI8201DNM8X | 0.0046 | 0.0120 |
| 267  | GM2GI8201CS03K | 0.0045 | 0.0089 |
| 710  | GM2GI8201BW5XP | 0.0044 | 0.0177 |
| 478  | GM2GI8201CG7HC | 0.0044 | 0.0068 |
| 252  | GM2GI8201ETTHS | 0.0044 | 0.0083 |
| 894  | GM2GI8201AGP2N | 0.0044 | 0.0110 |
| 560  | GM2GI8201EDNEK | 0.0044 | 0.0083 |
| 615  | GM2GI8201AZEC2 | 0.0043 | 0.0095 |
| 990  | GM2GI8201EWXWS | 0.0043 | 0.0098 |
| 329  | GM2GI8201D0LPC | 0.0043 | 0.0097 |
| 1395 | GM2GI8201DC9EM | 0.0043 | 0.0120 |
| 27   | GM2GI8201ATWBA | 0.0043 | 0.0083 |
| 1151 | GM2GI8201A15XN | 0.0043 | 0.0137 |
| 112  | GM2GI8201CQ99P | 0.0042 | 0.0082 |
| 347  | GM2GI8201BUH5D | 0.0042 | 0.0138 |
| 302  | GM2GI8201BUV42 | 0.0042 | 0.0137 |



|      |                |        |        |
|------|----------------|--------|--------|
| 322  | GM2GI8201C1MIW | 0.0042 | 0.0137 |
| 991  | GM2GI8201EDK17 | 0.0041 | 0.0082 |
| 373  | GM2GI8201BW2AS | 0.0041 | 0.0080 |
| 344  | GM2GI8201C2PS6 | 0.0041 | 0.0137 |
| 450  | GM2GI8201A9ULM | 0.0040 | 0.0130 |
| 271  | GM2GI8201DT9LR | 0.0040 | 0.0079 |
| 495  | GM2GI8201DAEB5 | 0.0040 | 0.0159 |
| 933  | GM2GI8201BD4IX | 0.0039 | 0.0074 |
| 548  | GM2GI8201A21T2 | 0.0039 | 0.0089 |
| 99   | GM2GI8201CCHCL | 0.0039 | 0.0095 |
| 420  | GM2GI8201B6UQO | 0.0039 | 0.0094 |
| 1087 | GM2GI8201EONFA | 0.0039 | 0.0125 |
| 33   | GM2GI8201ETASU | 0.0038 | 0.0073 |
| 530  | GM2GI8201EO61I | 0.0038 | 0.0108 |
| 592  | GM2GI8201E5DTE | 0.0038 | 0.0093 |
| 1055 | GM2GI8201C4PMJ | 0.0038 | 0.0153 |
| 1115 | GM2GI8201C669W | 0.0037 | 0.0119 |
| 1114 | GM2GI8201ASEG9 | 0.0037 | 0.0093 |
| 411  | GM2GI8201B6G1B | 0.0037 | 0.0117 |
| 263  | GM2GI8201CB0KG | 0.0037 | 0.0117 |
| 443  | GM2GI8201A3DFD | 0.0036 | 0.0101 |
| 546  | GM2GI8201AZC52 | 0.0036 | 0.0085 |
| 1034 | GM2GI8201A5G3W | 0.0036 | 0.0099 |
| 96   | GM2GI8201AL2BB | 0.0035 | 0.0063 |
| 1133 | GM2GI8201B64NO | 0.0035 | 0.0080 |
| 114  | GM2GI8201A1KNX | 0.0035 | 0.0063 |
| 1142 | GM2GI8201A43CH | 0.0035 | 0.0107 |
| 1431 | GM2GI8201AHX3E | 0.0034 | 0.0103 |
| 84   | GM2GI8201ECO96 | 0.0034 | 0.0094 |
| 999  | GM2GI8201COO17 | 0.0034 | 0.0105 |
| 161  | GM2GI8201BPO78 | 0.0034 | 0.0092 |
| 316  | GM2GI8201CSLGU | 0.0034 | 0.0078 |
| 1552 | GM2GI8201D5S2I | 0.0034 | 0.0106 |
| 527  | GM2GI8201ATHST | 0.0033 | 0.0104 |
| 1057 | GM2GI8201EEE61 | 0.0033 | 0.0071 |
| 512  | GM2GI8201D677W | 0.0033 | 0.0099 |
| 549  | GM2GI8201EEB6Z | 0.0033 | 0.0077 |
| 1363 | GM2GI8201EWQ4E | 0.0032 | 0.0103 |
| 190  | GM2GI8201DMSVT | 0.0032 | 0.0074 |
| 141  | GM2GI8201D40A5 | 0.0032 | 0.0098 |
| 956  | GM2GI8201DASMD | 0.0032 | 0.0070 |
| 492  | GM2GI8201DNWDK | 0.0032 | 0.0058 |
| 462  | GM2GI8201BQUXR | 0.0032 | 0.0128 |
| 209  | GM2GI8201AQ5TD | 0.0031 | 0.0125 |
| 423  | GM2GI8201AKMUR | 0.0031 | 0.0070 |
| 1478 | GM2GI8201DVE6C | 0.0031 | 0.0097 |
| 497  | GM2GI8201BAHPE | 0.0030 | 0.0083 |
| 1446 | GM2GI8201CYADZ | 0.0030 | 0.0067 |
| 371  | GM2GI8201DBBQ1 | 0.0030 | 0.0082 |
| 515  | GM2GI8201C582P | 0.0030 | 0.0091 |
| 261  | GM2GI8201EN4NU | 0.0030 | 0.0091 |

|      |                |        |        |
|------|----------------|--------|--------|
| 60   | GM2GI8201EZ0EW | 0.0029 | 0.0087 |
| 947  | GM2GI8201BSAPO | 0.0029 | 0.0063 |
| 1168 | GM2GI8201EO7NL | 0.0029 | 0.0090 |
| 199  | GM2GI8201B1KFC | 0.0029 | 0.0078 |
| 91   | GM2GI8201E27FT | 0.0028 | 0.0079 |
| 1143 | GM2GI8201APIV4 | 0.0028 | 0.0060 |
| 962  | GM2GI8201CQG7G | 0.0027 | 0.0058 |
| 970  | GM2GI8201EX4Q5 | 0.0027 | 0.0074 |
| 192  | GM2GI8201CM7TV | 0.0026 | 0.0073 |
| 1479 | GM2GI8201D713I | 0.0026 | 0.0057 |
| 39   | GM2GI8201DYXXN | 0.0026 | 0.0075 |
| 1410 | GM2GI8201DDY4J | 0.0026 | 0.0103 |
| 1132 | GM2GI8201BT66X | 0.0026 | 0.0076 |
| 1107 | GM2GI8201EE559 | 0.0026 | 0.0076 |
| 1436 | GM2GI8201BYWG1 | 0.0026 | 0.0075 |
| 910  | GM2GI8201BKKDN | 0.0025 | 0.0102 |
| 315  | GM2GI8201BDQBQ | 0.0025 | 0.0074 |
| 325  | GM2GI8201DFG41 | 0.0025 | 0.0074 |
| 895  | GM2GI8201AN9P6 | 0.0025 | 0.0074 |
| 251  | GM2GI8201ARW0E | 0.0025 | 0.0055 |
| 568  | GM2GI8201CDN6I | 0.0025 | 0.0073 |
| 518  | GM2GI8201EWF4F | 0.0025 | 0.0054 |
| 437  | GM2GI8201C2U11 | 0.0025 | 0.0055 |
| 331  | GM2GI8201A1AE0 | 0.0025 | 0.0073 |
| 370  | GM2GI8201CG27W | 0.0025 | 0.0073 |
| 1420 | GM2GI8201DBUI0 | 0.0025 | 0.0073 |
| 291  | GM2GI8201CTFSO | 0.0025 | 0.0073 |
| 215  | GM2GI8201DXADH | 0.0025 | 0.0073 |
| 241  | GM2GI8201CHJMQ | 0.0025 | 0.0053 |
| 508  | GM2GI8201DB1TY | 0.0024 | 0.0070 |
| 562  | GM2GI8201DCAG6 | 0.0024 | 0.0071 |
| 1125 | GM2GI8201D90E8 | 0.0024 | 0.0052 |
| 596  | GM2GI8201C7TAW | 0.0024 | 0.0051 |
| 529  | GM2GI8201DKIUO | 0.0024 | 0.0051 |
| 266  | GM2GI8201CQ1HD | 0.0024 | 0.0094 |
| 136  | GM2GI8201BTBFR | 0.0023 | 0.0066 |
| 117  | GM2GI8201CPKP4 | 0.0023 | 0.0066 |
| 1116 | GM2GI8201ANAPP | 0.0023 | 0.0068 |
| 490  | GM2GI8201CCHDV | 0.0023 | 0.0068 |
| 1123 | GM2GI8201CYGYU | 0.0023 | 0.0068 |
| 1342 | GM2GI8201BK3L8 | 0.0023 | 0.0065 |
| 487  | GM2GI8201AXQX0 | 0.0023 | 0.0064 |
| 280  | GM2GI8201AMRLF | 0.0022 | 0.0064 |
| 397  | GM2GI8201BPSTB | 0.0022 | 0.0063 |
| 1747 | GM2GI8201AP9NL | 0.0022 | 0.0060 |
| 1742 | GM2GI8201C0X1Y | 0.0022 | 0.0060 |
| 1741 | GM2GI8201DAY5C | 0.0022 | 0.0060 |
| 1141 | GM2GI8201DWP96 | 0.0022 | 0.0060 |
| 138  | GM2GI8201BPOWS | 0.0022 | 0.0060 |
| 473  | GM2GI8201DYVYY | 0.0021 | 0.0085 |
| 452  | GM2GI8201AER69 | 0.0020 | 0.0055 |

|      |                |        |        |
|------|----------------|--------|--------|
| 974  | GM2GI8201BBDD9 | 0.0020 | 0.0055 |
| 937  | GM2GI8201D1OT9 | 0.0020 | 0.0055 |
| 108  | GM2GI8201EDA0L | 0.0019 | 0.0053 |
| 1061 | GM2GI8201CIPXC | 0.0019 | 0.0077 |
| 940  | GM2GI8201AVPXG | 0.0019 | 0.0052 |
| 973  | GM2GI8201CSN0Z | 0.0019 | 0.0051 |
| 517  | GM2GI8201EG0KW | 0.0019 | 0.0051 |
| 211  | GM2GI8201A8C8A | 0.0018 | 0.0051 |
| 176  | GM2GI8201ANGOF | 0.0018 | 0.0051 |
| 934  | GM2GI8201C7VCW | 0.0018 | 0.0049 |
| 586  | GM2GI8201D64J1 | 0.0018 | 0.0049 |
| 1052 | GM2GI8201DIBI4 | 0.0018 | 0.0049 |
| 599  | GM2GI8201EQZV2 | 0.0018 | 0.0049 |
| 402  | GM2GI8201BSLPA | 0.0018 | 0.0050 |
| 1375 | GM2GI8201C90UY | 0.0017 | 0.0069 |
| 19   | GM2GI8201EH5RS | 0.0017 | 0.0047 |
| 932  | GM2GI8201CABXR | 0.0017 | 0.0047 |
| 911  | GM2GI8201D5A5V | 0.0017 | 0.0047 |
| 920  | GM2GI8201BM0EK | 0.0017 | 0.0046 |
| 624  | GM2GI8201CI6QJ | 0.0017 | 0.0046 |
| 998  | GM2GI8201DZA3P | 0.0017 | 0.0046 |
| 543  | GM2GI8201AWLJG | 0.0017 | 0.0067 |
| 579  | GM2GI8201C5Yaq | 0.0017 | 0.0067 |
| 544  | GM2GI8201EXWSD | 0.0017 | 0.0067 |
| 1039 | GM2GI8201B07JT | 0.0017 | 0.0046 |
| 1526 | GM2GI8201AJ8FL | 0.0017 | 0.0046 |
| 126  | GM2GI8201C4F96 | 0.0017 | 0.0046 |
| 151  | GM2GI8201CJA2T | 0.0017 | 0.0045 |
| 1122 | GM2GI8201EC4PA | 0.0017 | 0.0045 |
| 256  | GM2GI8201D8296 | 0.0016 | 0.0045 |
| 483  | GM2GI8201BEP11 | 0.0016 | 0.0045 |
| 564  | GM2GI8201B07Z7 | 0.0016 | 0.0044 |
| 240  | GM2GI8201B8MI1 | 0.0016 | 0.0044 |
| 1542 | GM2GI8201BX8FA | 0.0016 | 0.0044 |
| 242  | GM2GI8201ELXK3 | 0.0016 | 0.0044 |
| 1455 | GM2GI8201AYJVT | 0.0016 | 0.0044 |
| 1368 | GM2GI8201DY2AP | 0.0016 | 0.0044 |
| 1434 | GM2GI8201D3EJB | 0.0016 | 0.0064 |
| 1430 | GM2GI8201D6UXV | 0.0016 | 0.0064 |
| 1351 | GM2GI8201EH31I | 0.0016 | 0.0044 |
| 1172 | GM2GI8201A0DVL | 0.0016 | 0.0043 |
| 1161 | GM2GI8201ELL6K | 0.0016 | 0.0043 |
| 247  | GM2GI8201CACRH | 0.0016 | 0.0043 |
| 912  | GM2GI8201DOJWC | 0.0016 | 0.0043 |
| 1482 | GM2GI8201EEVVK | 0.0016 | 0.0043 |
| 254  | GM2GI8201DRJ4H | 0.0016 | 0.0063 |
| 988  | GM2GI8201ANRI3 | 0.0016 | 0.0043 |
| 434  | GM2GI8201CBA16 | 0.0016 | 0.0043 |
| 1120 | GM2GI8201A96GY | 0.0015 | 0.0042 |
| 496  | GM2GI8201DQEB3 | 0.0015 | 0.0042 |
| 1112 | GM2GI8201E6H7X | 0.0015 | 0.0042 |

|      |                |        |        |
|------|----------------|--------|--------|
| 511  | GM2GI8201EQJ3M | 0.0015 | 0.0042 |
| 1480 | GM2GI8201AHRJD | 0.0015 | 0.0041 |
| 236  | GM2GI8201CDM3Y | 0.0015 | 0.0041 |
| 265  | GM2GI8201DR2QV | 0.0015 | 0.0041 |
| 1130 | GM2GI8201EHHXK | 0.0015 | 0.0041 |
| 1365 | GM2GI8201CTIGX | 0.0015 | 0.0058 |
| 1358 | GM2GI8201D44LC | 0.0015 | 0.0058 |
| 446  | GM2GI8201DRT3T | 0.0014 | 0.0039 |
| 422  | GM2GI8201AM7O4 | 0.0014 | 0.0057 |
| 418  | GM2GI8201DJ6EN | 0.0014 | 0.0057 |

**Supplementary Information S6.** Fasta-formatted file of the dereplicated sequences for each of the 403 OTUs in this study.

>GM2GI8201B6JOT

gccacggctaactacgtgccagcagccgcggaatacgtaggtggcgagcgttatccggattactgggtgtaaagggcgtgtaggc  
ggtcttcaagtcggaagtgaaaattcatggctcaactgtgaactgcttacgaaactggaggacttgagtactagaggggaaggcgg  
aattcctagtgtagcggtaaaatgcttagagattaggaagaacaccgggtggcgaaggcggccttctggctagcaactgacgctgag  
gcgcgaaagcgtgggtagcaaacaggattagataccctggtagtccacgctgtaaacgatgagtgtaggtgctgggagaacctgg  
gtgccacagcaaacgcaataaacactccgcctggggagtacgcacgca

>GM2GI8201DC5KE

gccccggctaactacgtgccagcagccgcggaatacgtagggggcgagcgtgtccggaattattgggcgtaaagggtagctagg  
cggcttttaagttgacgtgaaagccccgggcttaactccggcaagcgttgaaaactggaggccttgagtatggaagggacagtg  
aattcctggtgtagtggtgaaatgcttagagattaggaagaacaccgggtggcgaaggcggccttctggctagcaactgacgctgag  
cgcgaaagcgtggggagcaaacaggattagataccctggtagtccacgcagtaaacgatgaatactgtatgtaggaggtatcgacc  
ccttctgtgctgaagttaacgtattaagtattccacctggggagtacgaccgca

>GM2GI8201A0DVL

gccccggctaactacgtgccagcagccgcggaatacgtagggggcgagcgtgtccggaattattgggcgtaaagggcgtgtagac  
ggatgggtaagttggctgttaacctgggggctaaacccccagcctgcaaccgaaactgctgatcttgagtaccagaggggaaagcg  
gaattcctagtggagcggtaaaatgcatagagattaggaagaacaccgggtggcgaaggcggccttctggctggaactgacgttag  
gcgcgaaagatgggtagcgaacaggattagataccctggtagtccataccgtaaacgatgaatactaggtgtaggaggtatcgact  
ccttctgtgccgaaacgaacgcattaagtattccacctggggagtacgatcgca

>GM2GI8201ELL6K

gccccggctaactacgtgccagcagccgcggaatacgtagggggcaagcgtgtccggaattattgggcgtaaagggtagctaggc  
ggcttgacacgttagcgtttaaagtggggctcaactcccattgctgtaaaaacgggtgaagccttgagtggtagaggggatcgtgaa  
ttcctggtgtagcggtaaatgcttagagatcaggaagaataaccagtgccgaaagcgcaggtctggataccaactgacgctgaggt  
acgaaagcgtggggagcaaacaggatcagataccctggtagtccacgcccgtaaacgatgattactcgaagtatgcgatatgacagt  
atgctccaagcgaagtgataagtaatccacctggggagtacgaccgca

>GM2GI8201EO7NL

ggtccggctaattacgtgccagcagccgcggaatacgtaggggcaagcgtgtccggaatcattgggcgtaaagggtagctaggc  
ggtatgataagttaggagtaaaaggcaccggctcaaccggcgtgaagctttaaaactgtcacttgagacattgaggggaaagtgg  
aatttctagtgtagcggtaaatgcttagagattaggaagaacaccagagggcgaaggcggccttctggactgcaactgacactgag  
cacgaaagcgtggggagcaaacaggattagataccctggtagtccacgcccgtaaacgatgagcactaggtatcggggtcagaag  
acttccgtgcccccgttaacgcattaagtgtccgcctggggagtacgtacgca

>GM2GI8201BCE7B

gccacggctaactacgtgccagcagccgcggaatacgtaggtggcgagcgttatccggattactgggtgtaaagggcgtgtaggc  
ggtcttcaagtcggaagtgaaaattcatggctcaactgtgaactgcttacgaaactggaggacttgagtactagaggggaaggcgg  
aattcctagtgtagcggtaaaatgcttagagattaggaagaacaccgggtggcgaaggcggccttctggctagcaactgacgctgag

gcgcgaaagcgtgggtatcgaacaggattagataccctgtagtccacgccgtaaaccgatgattactcgaagtatgcgatatgacag  
tatgctccaagcgaagtgataagtaatccacctgggaagtacgccggca

>GM2GI8201DCJWP

gccacggctaactacgtgccagcagccgcggaatacgtaggtggcgagcgtgtccggaatcattgggcgtaaagagtacgtagg  
cggtaagataagttaggagtaaaaggcaccggctcaaccggcgtaagctttaaaactgtttactgagacattgagggggaagtgg  
aattctagtgtagcggtgaaatgcgagatattaggaagaataccagaggcgaaagcgacttctagcgatgatctgacgctgaggt  
acgaaagcgtgggaagcaaacaggattagataccctgtagtccacgccgtaaaccgatgagtgtagatgtccgaggtaaactgg  
gtgctggaagccaacgcgataaaactccgctggggagtacgcacgca

>GM2GI8201EM1MO

gccacggctaacacgtgccagcagccgcggaatacgtaggtggcgagcgttatccgattactgggtgtaaagggcgtgtagacg  
gatgggtaagttggctgttaacctgggggctaaacccccagcctgcaaccgaaactgctgatcttgagtaccagaggggaaagcgg  
aattcctagtggagcggtaaaatgcatagagattaggaagaacaccgggtggcgaaggcggctttctggctggcaactgacgttgagg  
cgcgaaagtatgggtagcgaacaggattagataccctgtagtccataccgtaaaccgatgaatactaggtgtaggaggtatcgactc  
cttctgtgccgaaacgaacgcattaagtattccacctggggagtacgatcgca

>GM2GI8201DQFR0

gccccggctaactacgtgccagcagccgcggaatacgtagggcgagcgtgtccggaatgattgggtgtaaagggtagcagggc  
ggtctattaagttggcgtgaaagccccggggcttagctccggtaagcgttgaaaactggtgacttgaatagtggaagagatagtgga  
attcctagtgtagcggtgaaatgctagagattaggaagaataccaatggcgaaagcaactatctggacacatattgacgctgaggt  
acgaaagcgtggggagcaaacaggatcagataccctgtagtccacgctgtaaaccgatgagtgcaaggtgtgggggtaaaccc  
cgggtcccggtaaacacagtaagcactccgctggggagtacgtacgca

>GM2GI8201DNWDK

gccccggctaactacgtgccagcagccgcggaatacgtagggggcgagcgtgtccggaatgattgggtgtaaagggtagcaggg  
cggctattaagttggcgtgaaagccccggggcttagctccggtaagcgttgaaaactggtgacttgaatagtggaagagatagtgga  
aattcctagtgtagcggtgaaatgctagagattaggaagaataccaatggcgaaagcaactatctggacacatattgacgctgaggt  
tacgaaagcgtggggagcaaacaggattagataccctgtagtccacgccgtaaaccgatgaatactaggtgtagggggtagcagcc  
cccctgtgccggcctaacaataagtattccgctgggaattacgatcgca

>GM2GI8201D27UP

ggtccggctaattacgtgccagcagccgcggaatacgtagggggcgagcgtgtccggaatcattgggcgtaaagggtagcgtaggc  
ggctaattaagttaggagtgaaaagccatagctcaactatagtaagctttaaaactgattagcttgagtaattgaagggttaagtggaat  
tcctagtgtagcggtgaaatgcgagatattaggaagaataccagtggcgaaagcgacttactggcaattaactgacgctgaggtac  
gaaagcgtgggtatcgaacaggattagataccctgtagtccacgccgtaaaccgatgattactcgaagtatgcgatatgacagtatgc  
ttccaagcgaagtgataagtaatccacctgggaagtacgccggca

>GM2GI8201BL8EF

gccacggctaactacgtgccagcagccgcggaatacgtaggtggcgagcgttatccgattactgggtgtaaagggcgtgtaggc  
ggtcttcaagtcggaagtgaaaatcatggctcaactgtgaactgcttacgaaactggaggacttgagtactagagggggaaggcgg  
aattcctagtgtagcggtgaaatgcgagatattaggaagaataccagtggcgaaagcgacttactggcaattaactgacgctgaggt

acgaaagcgtgggtagcaaacaggattagataccctggtagtcacgctgtaaacgatgagtgttaggtctgggagaacctgggt  
gccacagcaaacgcaataaacactccgctggggagtagcacgca

>GM2GI8201DNM8X

ggtaccggctaatactacgtgccagcagccgcggaatacgtaggaccgagcgttgcggaatcattgggcgtaaagagtagctag  
gcggtatgataagtaggagtaaaaggcaccggctcaaccggcgtagctttaaaactgtcatacttgagacattgaggggaaaagt  
ggaattctagtagtagcggtagaatgcgtagatattaggaagaataccagaggcgaaagcgacttttagcgtatgatctgacgctga  
ggtacgaaagcgtgggaagcaaacaggattagataccctggtagtcacgctgtaaacgatgaatactgatgtagggatcga  
ccccttctgtgcgaagtaacgtattaagtattccacctggggagtagcaccgca

>GM2GI8201B6UQO

gccacggctaaactacgtgccagcagccgcggaatacgtagggtgcaagcgttgcggaattattgggcgtaaagggagcgcag  
gtggtggcctaagtctgatgtgaaagcccacggctcaaccgtggaaggtcattggaactgggtcacttgagtgacagaagaggaaag  
tggattcctatgttagcggtagaatgcgtagatattggaggaacaccagtgccgaaggcgactttctggtctgacactgacactga  
ggctcgaagcgtggggagcgaacaggattagataccctggtagtcacgctgtaaacgatgaatgtaagtgtggggggttcca  
cccctcagtgctggcgtaacgcaataaacattccgctggggagtagcggccgca

>GM2GI8201AM7O4

gcaccggctaactacgtgccagcagccgcggaatacgtagggtgcaagcgttgcggaattactgggcgtaaagagctcgtaggt  
ggtttgctcgcgttagtgaaagcccgggcttaactccgggtctgctggcgatacgggcataacttgatgcttaggggagactgg  
aattcctggttagcggtagaatgcgtagatattcaggaggaacaccgatggcgaaggcaggtctctgggcagtaactgacgctgag  
gagcgaagcatggtagcgaacaggattagataccctggtagtcacgctgtaaacgatgagtgttagatgctcgaggtaaacctg  
ggtgtcacaagccaacgcgataaacactccgctggggagtagctacgca

>GM2GI8201DJ6EN

gccacggctaactacgtgccagcagccgcggaatacgtagggtgagcgttaccggattactgggtgtaaagggcgtgtaggc  
ggtcttcaagtcggaagtgaaaattcatggctcaactgtgaactgcttacgaaactggaggacttgagtactagaggggaaggcgg  
aattcctagtagcggtaaatgcttagagattaggaagaacaccgggtggcgaaggcggccttctggctagcaactgacgctgag  
gcgcgaaagcgtggggagcaaacaggattagataccctggtagtcacgctgtaaacgatgaatgctaggtgctgggggtcaaac  
ctcgggtccgaagtaaacacattaagcattccgctggggagtagcggtagca

>GM2GI8201A3DFD

gcaccggctaactacgtgccagcagccgcggaatacgtaggggcgagcgttgcggaattattgggcgtaaagggtagctagg  
cggcttttaagttgacgtgaaagcccgggcttaactccggcaagcgttgaactggaaggcttgagtatggaagggacagtgg  
aattcctggttagtggtgaaatgcttagagattaggaagaataccaatggcgaagcaactatctggacacatattgacgctgaggt  
acgaaagcgtggggagcaaacaggattagataccctggtagtcacgctgtaaacgatgaatgctaggtgctgggggtcaaacct  
ggtgccgacgttaaacacattaagcactccacctggggagtagcgcagca

>GM2GI8201DRT3T

gccccggctaactacgtgccagcagccgcggaatacgtaggggcgagcgttgcggaatgattgggtgtaaagggtagcgcagg  
cggctctattaagttggcgtgaaagcccgggcttagctccggtaagcgttgaactggttagacttgaatagtgaagagatagtg  
aattcctagtagcggtagaatgcttagagattaggaagaataccaatggcgaagcaactatctggacacatattgacgctcaggt

acgaaagcgtggggagcaaacaggattagataccctgtagtccacgccgtaaacgatgagcactaggtatcggggtcagaaga  
cttcggtgcccgtaaacgcattaagtgtccgcctggggagtagctacgca

>GM2GI8201BZ8C9

gtatcggctaactccgtgccagcagccgcgtaatacggaggatacagcgttatccggattattgggttaaagggcgcagggc  
gtctgtcaagtcaggggtgaaaagccgaggtcaacctggcttggccttgaaactggtggactggagagtagatgtggtggcg  
atgctgtagttagcggtgaaatgcatagatattacgcagaactccgattgcgaaggcagctcaaaaagtatactgacgctgaggc  
acgaaagcgtgggtatcgaaacaggattagataccctgtagtccacgccgtaaacgatgaatactgtagtaggaggtatcgaccc  
tctgtgtcgaagtaacgtattaagtattccacctggggagtagcaccgca

>GM2GI8201AKMUR

ggtccggctaattacgtgccagcagccgcgtaatacgtaggaccgagcgttgcggaatcattgggcgtaaagggcgcaggg  
cggctgtcaagtcaggggtgaaaagccgaggtcaacctggcttggccttgaaactggtggactggagagtagatgtggtggcg  
gaatgcgtagttagcggtgaaatgcatagatattacgcagaactccgattgcgaaggcagctcaaaaagtatactgacgctgag  
gcacgaaagcgtgggtatcgaaacaggattagataccctgtagtccacgccgtaaacgatgattactcgaagtagcgatgacag  
tatgtccaagcgaagtagataagtaatccacctgggaagtagcggcgca

>GM2GI8201CBA16

gcaccggctaactccgtgccagcagccgcgtaatacggagggcgcagcgttgcggaatcattgggcgtaaagggcgcgtag  
gtggcccgtcagtcggtgaaagcgcggggctcaacctgctgcggcagggatactgctgcggcttgacactgtagaggca  
ggcggaattccgggttagcggtggaatgcgtagagatccggaagaacaccgggtggcgaaggcggcctgctgggcagtttggtg  
aactgaggcgcgacagcgtggggagcaaacaggattagataccctgtagtccacgccgtaaacgatggcactagggcgttg  
gggagcagcccctcgagggccggcgtaacgcattaagtccccgcctggggagtagcggccgca

>GM2GI8201DRJYS

gccccggctaactacgtgccagcagccgcgtaatacgtagggggcgcagcgttgcggaatattgggcgtaaagggtagctagg  
cggactgaaagttgacgtgaaagcccggggcttaacccggcgagcgttaaaaactacaggcctgagtgtagaagggatcgt  
ggaattcctagtagcgtgaaatgcgtagagattaggaagaataccagtgggcgaagcgcagatctggataccaactgacgctg  
aggtagaaagcgtggggagcaaacaggattagataccctgtagtccacgccgtaaacgatgaatactgtagtaggaggtatcg  
accttctgtgtcgaagtaacgtattaagtattccacctggggagtagcaccgca

>GM2GI8201ED5ES

gccccggctaactacgtgccagcagccgcgtaatacgtagggggcgcagcgttgcggaatgattgggtgtaaagggtagcaggg  
cggctattaagttggcgtgaaagcccggggcttagctccggaagcgttgaaaactggtagacttgaatagtgaagagatagtg  
aattcctagtagcgtgaaatgcgtagagattaggaagaataccaatggcgaaagcaactatctggacacatattgacgctgagg  
tacgaaagcgtggggagcaaacaggattagataccctgtagtccacgccataaacgctgagtgtgtaggtgtgggggtcaaact  
cgggtgcccgtaaacacagtaagcactccgcctggggagtagctacgca

>GM2GI8201AXSRF

gccccggctaactacgtgccagcagccgcgtaatacgtagggggcgcagcgttgcggaatgattgggtgtaaagggtagcaggg  
cggctattaagttggcgtgaaagcccggggcttagctccggaagcgttgaaaactggtagacttgaatagtgaagagatagtg  
aattcctagtagcgtgaaatgcgtagagattaggaagaataccaatggcgaaagcaactatctggacacatattgacgctgagg



tacgaaagcgtgggaagcaaacaggattagataccctggtagtagccacgccgtaaacgatgagtgtagatgtccgaggtaaactgggtgtcacaagccaacgcgataaacactccgctggggagtagctacgca

>GM2GI8201AGKGS

gccacggctaactacgtgccagcagccgcggaatacgtaggtggcgagcgttatccggattactgggtgtaaagggcgttagcggctttcaagtcggaagtgaaaattcatggctcaactgtgaactgcttacgaaactggaggacttgagtactagaggggaaggcgaattcctagtagcggtaaaatgcgtagagattaggaagaacaccgggtggcgaaggcggccttctggctagcaactgacgctgagcgcgaaagcgtggggagcaaacaggattagataccctggtagtagccacgccgtaaacgatgagcactaggtatcggggtcagaa gactcgggtcccggttaacgcattaagtgtccgcctggggagtagctacgca

>GM2GI8201EUJCN

gccccggctaactacgtgccagcagccgcggaatacgtagggggcgagcgttccggaattattgggcgtaaagggtagctaggcggcttttaagttgacgtgaaagccccgggcttagctccggaagcgttgaaaactggtagactgaaatagtggaagagatagtggaattcctagtagcgggtgaaatgcgtagagattaggaagaataccaatggcgaaagcaactatctggacacatattgacgctgaggtacgaaagcgtggggagcaaacaggattagataccctggtagtagccacgccataaacgctgagtgtaggtgtgggggtcaaacctcgggtccgacgttaacacattaagcactccacctggggagtagcgcacgca

>GM2GI8201CSCVD

gccccggctaactacgtgccagcagccgcggaatacgtagggggcaagcgttatccggattcattgggcgtaaagcgcgcgagcggcgcccaagcggggttttaacctggggcttaaccctaagccggacccccgaactggcgtgctcgagtgccgtagaggcaggcggaaactcccgggtgtagcgggtggaatgcgcagatatccggaggaacaccgacggcgaaggcagcctgccgggccgactgacgctcaggcgcgaaagccgggggagcgaacaggattagataccctggtagtagccggccgtaaacgatgatagctaggtgtggggagacactcttctgcgccgagcaaacgcgttaagctatccgctggggagtagcggccgca

>GM2GI8201DT1FM

gccccggctaactacgtgccagcagccgcggaatacgtagggggcgagcgttccggaattattgggcgtaaagggtagctaggcggactgaaagttgacgtgaaagccccgggcttaaccccgcgagcgttaaaaactacaggccttgagtgtagaagggatcgtggaattcctagtagcgggtgaaatgcgtagagattaggaagaataccagtgggcgaagcgcagatctggataccaactgacgctgaggtagaaagcgtggggagcaaacaggatcagataccctggtagtagccacgctgtaaacgatgagtgcaaggtgtgggggtcaaacccgggtcccggttaacacagtaagcactccgctggggagtagctacgca

>GM2GI8201B6G1B

gtatcggctaactccgtgccagcagccgcggaatacggaggatacgcggttatccggatttattgggtttaaagggtagcgcaggcgtctttcaagtcggaagtgaaaattcatggctcaactgtgaactgcttacgaaactggaggacttgagtactagaggggaaggcgaattcctagtagcggtaaaatgcgtagagattaggaagaacaccgggtggcgaaggcggccttctggctagcaactgacgctgagcgcgaaagcgtggggagcaaacaggattagataccctggtagtagccacgcagtaaacgatgaatactgatgtaggaggtatcgacccttctgtgcgaagttacgtattaagtattccacctggggagtagcaccgca

>GM2GI8201DMQL7

gccacggctaactacgtgccagcagccgcggaatacgtaggtggcgagcgttatccggattactgggtgtaaagggcgttagcggctttcaagtcggaagtgaaaattcatggctcaactgtgaactgcttacgaaactggaggacttgagtactagaggggaaggcgaattcctagtagcggtaaaatgcgtagagattaggaagaataccagtgggcgaaggcgcagctgtctggacattaactgacgctgagg

tacgaaagcgtggggagcaaacaggatcagataccctgtagtccacgctgtaaacgatgagtgaaggtgtgggggtcaaacc  
ccggtgccgccgtaaacacagtaagcactccgcctggggagtagctacgca

>GM2GI8201C2U11

gccccggctaactacgtgccagcagccgcgtaatacgtagggggcgagcgttatccggaattattggcgtaaagagtgcgtaggt  
ggctgtgcaagcgcagtggttaagataacggcttaaccggttatgccgagcgaactggacagcttgagtacaggagaggaaagcg  
gaattcctagtgtagcggtgaaatgcgtagagattaggaagaataccagtgggcgaagcgacgatctggataccaactgacgctga  
ggtacgaaagcgtggggagcaaacaggattagataccctgtagtccacgctgtaaacgatgagtctagatgtcgggtgtcaaag  
ctcgttatcgccgtaaacacattaagcactccgcctggggagtagctacgca

>GM2GI8201BSLPA

gccccggctaactacgtgccagcagccgcgtaatacgtagggggcaagcgttatccggaattactgggtgtaaaggagcgtaga  
cggagaggcaagtctgatgtgaaagaccggggctcaaccgggggttcattggaaactgtttgtctagagtaccggaggggtaag  
cggaaattcctagtgtagcggtgaaatgcgtagatattaggaggaacaccagtgggcgaagggcggtactggacggttaactgacggtg  
aggctcgaagcgtggggagcaaacaggattagataccctgtagtccacgctgtaaacgatgaataactaggtgtgggcagca  
agctgttcggtgccgagcaaacgcaataagtattccacctggggagtagcttcgca

>GM2GI8201DWDE2

gccacggctaactacgtgccagcagccgcgtaatacgtaggtggcgagcgttatccggaattactgggtgtaaaggcggttaggc  
ggtctttcaagtcggaagtgaaaattcatggctcaactgtgaactgcttacgaaactggaggacttgagtactagaggggaaggcgg  
aattcctagtgtagcggtaaaatgcgtagagattaggaagaacaccggtggcgaagggcggtctctggtagcaactgacgctgag  
gcgcgaagcgtggggagcaaacaggattagataccctgtagtccacgcataaacgctgagtgttaggtgtgggggtcaaac  
ctcgttgccgacgtaaacacattaagcactccacctggggagtagcgcagca

>GM2GI8201BPSTB

gccccggctaactacgtgccagcagccgcgtaatacgtagggggcgagcgttatccggaattattggcgtaaagagtgcgtaggt  
ggctgtgcaagcgcagtggttaagataacggcttaaccggttatgccggcgaaactggacagcttgagcacaggagaggaaagcg  
gaattcctagtgtagcggtgaaatgcgtagatattaggaagaacaccagtgggcgaagggcggttctctggaccttctgacgctgagg  
agcgaagcgtggggagcaaacaggcttagataccctgtagtccacgctgtaaacgggtgggtactaggtgtgggatccattccac  
ggattctgtgccgtagtaacgattaagtacccgcctggggagtagcggccgca

>GM2GI8201EU6AD

gccccggctaatacgtgccagcagccgcgtaatacgtagggggcgagcgttccggaatgattgggtgtaaagggtacgcagggc  
ggtctattaagttggcgtgaaagcccggggcttagctccggaagcgttgaaaactgtagactgaatagtgaagagatagtga  
attcctagtgtagcggtgaaatgcgtagagattaggaagaataccaatggcgaagcaactatctggacacatattgacgctgagg  
acgaaagcgtggggagcaaacaggattagataccctgtagtccacgcataaacgctgagtgttaggtgtgggggtcaaacctc  
ggtgccgacgtaaacacattaagcactccacctggggagtagcgcagca

>GM2GI8201CP1X3

gccacggctaactacgtgccagcagccgcgtaatacgtaggtggcgagcgttatccggaattactgggtgtaaaggcggttaggc  
ggtctttcaagtcggaagtgaaaattcatggctcaactgtgaactgcttacgaaactggaggacttgagtactagaggggaaggcgg  
aattcctagtgtagcggtaaaatgcgtagagatcaggaagaacaccggtggcgaagggcgacttctggacgacaactgacgctgag

gcgcgaaagcgtggggagcaaacaggattagataccctggtagtccacgccgtaaacgatgaatactagggtgtaggggatcga  
ccccctgtgccggcctaacacaataagtattccgcctgggaattacgatcgca

>GM2GI8201CL55L

gcaccggctaactccgtgccagcagccgcggaatacgggggtgcaagcgttactcggaatcactgggcgtaaagagcatgtagg  
cggattaataagttgaaagtgaaatcctatagcttaactatagaactgctttgaaaactgtaatctagaatgtgggagaggtatgga  
atttctggtgtaggggtaaaatccgtagagatcagaaggaataccgattgcaaggcgatctactggaacattattgacgctgagatg  
cgaaagcgtggggagcaaacaggattagataccctggtagtccacgccctaaacgatgtacactagttgtgtgagactgtatcttgc  
agtaatgcagttaacacattaagtgtaccgcctggggagtacggtcgca

>GM2GI8201EFF89

gcaccggctaactccgtgccagcagccgcggaatacggagggtgcaagcgttaatcggaattactgggcgtaaagcgcacgcag  
gcggttgataagttagatgtgaaagccccgggctcaacctgggaattgcattaaaactgtccggctagagctttagaggggggga  
gaattccaggttagcgggtgaaatgcgtagagatctggaggaataccggtggcgaaggcggccccctggacaaagactgacgctc  
aggtgcgaaagcgtggggagcaaacaggattagataccctggtagtccacgccgtaaacgatgtcgattggaggctgtccttga  
gacgtggctccggagctaacgcgtaaatcgaccgcctggggagtacggccgca

>GM2GI8201EW60P

gcgccggccaactacgtgccagcagccgcggaatacgtagggcgagcgttgcggatttattgggcgtaaagagctcgtagg  
cggcttgcgcgtcgttgcgtaaacctgcagctcaactgcaggcttgcggtcgatacgggcaggctggagttcggtaggggagactg  
gaattcctggttagcgggtgaaatgcgtagatcaggaggaacaccggtggcgaaggcgggtctctggccgatactgacgctga  
ggagcgaagcgtggggagcgaacaggattagataccctggtagtccacgctgtaaacggtgggcgctaggtgtggggggcctctc  
cggttctctgtccgcagctaacgcattaagcgccccgcctggggagtacggccgca

>GM2GI8201BPO78

gccccggctactacgtgccagcagccgcggaatacgtagggggcgagcgttgcggatttactgggcgtaaagggtgagtaggc  
ggtaattaagtcagatgtaaaggcataggctcaactatgtaagcatctgatactggtaacttgatgagcaggagaggtgaagtgaat  
tcttagttagcgggtgaaatgcgtagatattaggaggaacaccagtgccgaaggcgacttactggactgtaactgacgctgagtcac  
gaaagcgtgggtagcaaacaggattagataccctggtagtccacgctgtaaacgatgagtgctaggtgtgggtagcgatactcagtg  
ccgacgtaaacacaataagcactccgcctggggagtacggtcgca

>GM2GI8201BE5C4

gcaccggctaactctgtgccagcagccgcggaatacagagggtgcgagcgttaatcggaattactgggcgtaaagcgcagtgtagg  
tggctaattaagtcacatgtgaaatccctgggcttaacctaggaactgcatgtgatactggtagctagatgtgagaggaaagtag  
aattccaggttagcgggtgaaatgcgtagagatctggaggaataccgatggcgaaggcagcttctggcataatactgacactgaga  
ctcgaaagcgtgggtagcaaacaggattagataccctggtagtccacgccgtaaacgatgtctactagccgttggggcccttgaggct  
ttagtggcgagttaacgcgataagtagaccgcctggggagtacggccgca

>GM2GI8201EU11F

gcaccggctaactccgtgccagcagccgcggaatacggagggtgcaagcgttaatcggaattactgggcgtaaagcgcacgcag  
gcggtctgcaagtcggatgtgaaatccccgggctcaacctgggaactgcattcgaaactggcaggcttagtctttagaggggggt  
agaattccaggttagcgggtgaaatgcgtagagatctggaggaataccggtggcgaaggcggccccctggacaaagactgacgct

caggtgcgaaagcgtggggagcaaacaggattagataccctggtagtcacgccgtaaacgatgctgactggagggtgtgccctg  
aggcgtggctccggagctaacgcgtaagtcgaccgcctggggagtacggccgca

>GM2GI8201CL5TR

gccacggctaactacgtgccagcagccgcggaatacgtaggtggcaagcgtgtccggaattattggcgtaaagcgcgcgagg  
tggtttctaagtctgatgtgaaagcccacggctcaaccgtggaaggcattggaaactgggagactgagtgacagaagaggaaagt  
ggaattccaagttagcgggtgaaatgcgtagagattggaggaacaccagtgccgaaggcgactttctggtctgtaactgacactgag  
gcgcgaaagcgtggggagcaaacaggattagataccctggtagtcacgccgtaaacgatgagtgctaagtgttagggggttccg  
ccccttagtgctgcagctaacgcattaagcactccgcctggggagtacggtcgca

>GM2GI8201CZCFH

gccccggctaactacgtgccagcagccgcggaatacgtagggggcaagcgtgtccggaattattggcgtaaagggtgcgtaggc  
ggcctttaaagtcagatgtgaaagtcacggctcaaccgtggaagcattgaaactgaaaggctgagttaaggagaggaaagtgg  
aattcctagtgtagcgggtgaaatgcgtagatattaggaggaataaccagtgccgaaggcgactttctggactatactgacgctgaggca  
cgaaagcgtggggagcgaacaggattagataccctggtagtcacgccgtaaacgatgagtgctaggtgtgggggtcaaacctg  
gtgccgagctaacgcattaagcactccgcctggggagtacgtacgca

>GM2GI8201AWYD7

gccacggctaactacgtgccagcagccgcggaatacgtaggtggcaagcgttatccggaattattggcgtaaagggtgcgcagg  
cggcaattaaagtcggtgtaaagactgaagctcaactcaggtggccatggaaactgggtgctagagtgacggagagggtagtg  
gaattccatgtgtagcggtaaaatgcgtagatattaggaggaacaccagtgccgaaagcggctacctggcctgtaactgacgctcat  
gcacgaaagcgtggggagcaaataggattagataccctagtagtcacgccgtaaacgatgagaactaagtgtggggaaactca  
gtgctgccgtaacgcaataagttctccgcctggggagtacgcagca

>GM2GI8201D14DN

ggatcggctaactccgtgccagcagccgcggaatacgtaggtggcaagcgtgtccggaattattgggtttaaagggtgcgtaggtg  
gtttgataagtcagcgtgaaagttgcagcttaactgtaaaaatgccgtgaaactgctggactgagtgtaaatgaggtaggcggaa  
gctggtgttagcgggtgaaatgcgtagatatacgcgagaactccgattgcgaaggcagcttactaagctacaactgacactgaagc  
gaaagcgtggggatcaaacaggattagataccctggtagtcacgcagtaaacgatgattactagctgtttgcgatacacagtaagc  
ggcacagcgaagcgttaagtaatccacctggggagtacgcggca

>GM2GI8201COO17

gccacggctaactacgtgccagcagccgcggaatacgtaggtggcaagcgtgtccggaattactggcgtaaaggggagcgtaggt  
ggattctaagttagatgtgaaataccgggcttaactgggtgctgcattcaactgggaatctagagtgacggagaggaaagtgg  
aattcctagtgtagcgggtgaaatgcgtagagattaggaagaacaccagtgccgaaggcgactttctggactgtaactgacactgagg  
ctcgaaagcgtggggagcaaacaggattagataccctggtagtcacgccgtaaacgatggatactaggtgtggggaggtatcaact  
cctccgtgccgcttaacacattaagtatccgcctggggagtacggtcgca

>GM2GI8201ANRI3

ggtccggctaattacgtgccagcagccgcggaatacgtaggtggcaagcgtgtccggaatcattggcgtaaagagtacgtaggc  
ggtatgataagttaggagtaaaagcaccggctcaaccggcgttaagctttaaaactgctacttgagacattgaggggaaagtgg  
gaatttctagttagcgggtgaaatgcgtagagatcaggaagaacaccgggtggcgaaggcgccttctggctggcaactgacgctga

ggcgcgaaagcgtgggatcaaacaggattagataccctggtagtcacgctgtaaacgatgaatacttgatgtaggaggtatcgac  
cccttctgtgcgaagttaacgtattaagattccacctggggagtacggccgca

>GM2GI8201AL2BB

ggtaccggctaattacgtgccagcagccgcggaatacgtaggaccgagcgttgcggaattattgggcgtaaagggtagctagg  
cggcttctaagttgacgtgaaattccggggcttaactccggcaagcgttgaaaactggggagcttgagtgatggaagggacagtgg  
aattcctggtgtagtggtgaaatgcgagagatcaggaagaataccgggtggcgaaggcgactgtctggacattaactgacgctgagg  
tacgaaagcgtggggagcaaacaggatcagataccctggtagtcacgctgtaaacgatgagtgaagggtgtgggtgcaaaact  
cagtcccgcttaacacagtaagcactccgcctggggagtacgtacgca

>GM2GI8201AZRDJ

gccccggctaactacgtgccagcagccgcggaatacgtaggggcgagcgttgcggaattattgggcgtaaagggtagctagg  
cggactgaaagttgacgtgaaagccccggggcttaaccccgcgagcgttaaaaacttcaggccttgagtggtagaagggatcgtg  
gaattcctagtgtagcgggtaaatgctagagattaggaagaataccagtgggcgaagcgactactggcaattaactgacgctgag  
gtacgaaagcgtgggtagcaaacaggattagataccctggtagtcacgctgtaaacgatgagtgttaggtgtctgggataacctggg  
tgccatagctaacgcaataaacactccgcctggggagtacgcacgca

>GM2GI8201EC6D6

gccacggctaactacgtgccagcagccgcggaatacgtaggggcgagcgttatccggattactgggtgtaaagggcgtgtaggc  
ggtctttaagtcggaagtgaaaattcatggctcaactgtgaactgcttacgaaactggaggacttgagtaccagaggggaaggcgg  
aattcctggtgtagcggtaaatgctagagatcaggaagaacaccgggtggcgaaggcggccttctggtggcaactgacgctgag  
gcgcgaagcgtgggaagcaaacaggattagataccctggtagtcacgccgtaaacgatgagtgttagatgtccgaggtaaact  
gggtgtcacaagccaacgcgataaacactccgcctggggagtacgtacgca

>GM2GI8201CQ99P

gccccggctaactacgtgccagcagccgcggaatacgtaggggcgagcgttgcggaattattgggcgtaaagggtagctagg  
cggcttttaagttgacgtgaaagccccggggcttaactccggcaagcgttgaaactggaggccttgagtgatggaagggacagtgga  
attcctggtgtagtggtgaaatgcgagagatcaggaagaataccagtgggcgaaggcgactgtctggacattaactgacgctgaggt  
acgaaagcgtggggagcaaacaggatcagataccctggtagtcacgctgtaaacgatgagtgaagggtgtgggggtcaaacc  
cgggtcccgcttaacacagtaagtattccgcctgggaattacgatcgca

>GM2GI8201DZA3P

gccacggctactacgtgccagcagccgcggaatacgtaggggcgagcgttatccggattactgggtgtaaagggcgtgtaggcg  
gtctttaagtcggaagtgaaaattcatggctcaactgtgaactgcttacgaaactggaggccttgagtgatggaagggacagtggaa  
ttcctggtgtagtggtgaaatgcgagagatcaggaagaataccagtgggcgaaggcgactgtctggacattaactgacgctgaggt  
cgaagcgtggggagcaaacaggatcagataccctggtagtcacgctgtaaacgatgagtgaagggtgtgggggtcaaacct  
ggtgcccgcttaacacagtaagcactccgcctggggagtacgtacgca

>GM2GI8201CCHCL

gccccggctaactacgtgccagcagccgcggaatacgtaggggcgagcgttatccggattattgggcgtaaagagtgctaggt  
ggctgtgcaagcgcagtggttaagataacggcttaaccgttgatgccgggcaactggacagcttgagtacaggagaggaaagcg  
gaattcctagtgtagcgggtaaatgctagatattaggaagaacaccagagggcgaaggcggcttctggactgcaactgacgctgag

gcgcgaaagcgtggggagcaaacaggattagataccctggtagtcacgccgtaaacgatgaatactaggtgtaggggatcga  
ccccctgtgccggcgctaacacaataagtattccgctggaattacgatcgca

>GM2GI8201DOPZW

gccccggctaactacgtgccagcagccgcgtaatacgtagggggcgagcgtgtccggaattattggcgtaaagggtagctagg  
cggcttttaagttgacgtgaaagcccgggcttaactccggcaagcgtgaaaactggagggcttgagtgatggaagggacagtgg  
aattcctggtgtagtggtgaaatgcgagagatcaggaagaataaccagtggcgaaggcgactgtctggacattaactgacgctgagg  
tacgaaagcgtggggagcaaacaggatcagataccctggtagtcacgccgtaaacgatgagtgtagatgctgggtgcaaaagct  
cggatcgccttaacacattaagcactccgcctggggagtacgtacgca

>GM2GI8201DDO61

gccacggctaactacgtgccagcagccgcgtaatacgtaggtggcgagcgttatccggattactgggtgtaaagggcgttaggc  
ggtcttttaagtcggaagtgaaaattcatggctcaactgtgaactgcttacgaaaactggaggacttgagtaccagaggggaaggcg  
gaattcctggtgtagcggtaaaatgctagagatcaggaagaacaccggtggcgaaggcggcctctggctggcaactgacgctga  
ggcgcaaaagcgtggggagcaaacaggattagataccctggtagtcacgccgtaaacgatgaatactaggtgtagggggatcgc  
acccccctgtgccggcgctaacacaataagtattccgctggaattacgatcgca

>GM2GI8201CHJMQ

gccccggctaactacgtgccagcagccgcgtaatacgtagggggcgagcgtgtccggaattattggcgtaaagggtagctaggc  
ggcttttaagttgacgtgaaagcccgggcttaactccggcaagcgtgaaaactggagggcttgagtgatggaagggacagtgg  
aattcctggtgtagtggtgaaatgcgagagatcaggaagaataaccagtggcgaaggcgactgtctggacattaactgacgctgagg  
tacgaaagcatgggtagcgaacaggattagataccctggtagtcacgccgtaaacggtgggcgctaggtgtgagtcctccacgg  
ggttcgtgccgtagctaacgcattaagcggcccgctggggagtacggccgca

>GM2GI8201EDK17

gccccggctaactacgtgccacagccgcgtaatacgtagggggcgagcgtgtccggaattattggcgtaaagggtagctaggc  
cggcttttaagttgacgtgaaagcccgggcttaactccggcgagcgtgaaaactggagggcttgagtgatggaagggacagtgg  
aattcctggtgtagtggtgaaatgcgagagatcaggaagaataaccagtggcgaagcgacgatctggataccaactgacgctgag  
gtacgaaagcgtggggagcaaacaggattagataccctggtagtcacgccgtaaacgatgagtgaaggtgtgggggtcaaacc  
ccggtgccggcgttaacacagtaagcactccgcctggggagtacgtacgca

>GM2GI8201CGJ4U

gcaccggctaactacgtgccagcagccgcgtaatacgtaggggtgagcgtgtccggaattactggcgtaaagagctcgtagg  
ggtttgctgctgctgtgaaattccggggcttaactccggcgagcgtgaaaactggagggcttgagtgatggaagggacagtgg  
aattcctggtgtagcgggtgaaatgcgagatcaggaagaacaccggtggcgaaggcgggtctctgggcagtaactgacgctgag  
gagcgaagcatggggagcgaacaggattagataccctggtagtcacgccgtaaacggtgggcgctaggtgtgggttccctccac  
gggatccgtgccgtagctaacgcattaagtaccccgctggggagtacggccgca

>GM2GI8201CG7HC

gccccggctaactacgtgccagcagccgcgtaatacgtagggggcgagcgtgtccggaattattggcgtaaagggtagctaggc  
ggcttttaagttgacgtgaaagcccgggcttaactccggcgagcgtgaaaactggagggcttgagtgatggaagggacagtgg  
aattcctggtgtagtggtgaaatgcgagagatcaggaagaataaccagtggcgaaggcgactttctagcgatgatctgacgctgagg

acgaaagcgtgggaagcaaacaggattagataccctgtagtccacgccgtaaacgatgagtgtagatgtccgaggtaaacttgg  
gtgtcacaagccaacgcgataaacactccgctggggagtacgtacgca

>GM2GI8201DRBK9

gccacggctaactacgtgccagcagccgcggaatacgtaggtggcaagcgtgtccggattactgggcgtaaaggatgcgtaggc  
ggatatttaagtgggatgtgaaatacccgggctcaacttgggtgctgcattccaaactggatatctagagtgcaggagaggaaagcg  
gaattcctagtgtagcggtgaaatgcgtagagattaggaagaacaccagtggcgaaggcggcttctggactgtaactgacgctgag  
gcatgaaagcgtggggagcaaacaggattagataccctgtagtccacgccgtaaacgatgaatactaggtgtaggaggtatcgac  
tcctctgtgccgcagttaacacaataagtattccgctggggagtacgatcgca

>GM2GI8201ES7FI

gccacggctaactacgtgccagcagccgcggaatacgtaggtggcgagcgtgtccggattactgggcgtaaaggagcgtagg  
cggattcttaagtgggatgtgaaatacccgggctcaacttgggtgctgcattccaaactgggaatctagagtgcaggaggggagagt  
ggaattcctagtgtagcggtgaaatgcgtagagattaggaagaacaccagtggcgaaggcgcactctctggactgtaactgacgctga  
ggctcgaaagcgtggggagcaaacaggattagataccctgtagtccacgccgtaaacgatgaatactaggtgtaggggttcaac  
acctctgtgccgccgctaacgcattaagtattccgctggggagtacggctcgca

>GM2GI8201C7VCW

gccccggctaactacgtgccagcagccgcggaatacgtagggggcgagcgtgtccggaattattgggcgtaaagggtacgtagg  
cggcttttaagttgacgtgaaagccccgggcttaactccggcaagcgttgaaaactggaggccttgagtgatgaaaggacagctgg  
aattcctggtgtagtggtgaaatgcgcagagatcaggaagaataccagtggcgaaggcgcactgtctggacattaactgacgctgagg  
tacgaaagcgtggggagcaaacaggatcagataccctgtagtccacaccgtaaacgatggatactaggtgttgcaagcgtattgt  
cagtgccggcgctaacgcaataagtatccacactggggagtacgaccgca

>GM2GI8201DJS24

gccacggctaatacgtgccagcagccgcggaatacgtaggtggcgagcgttatccggattactgggtgtaaaggcggtgtaggc  
gtcttttaagtcggaagtgaaaattcatggctcaactgtgaacttgcttacgaaactggaggacttgatcaccagaggggaaggcgg  
attcctggtgtagcggtaaaatgcgtagagatcaggaagaacaccggtggcgaaggcggccttctggctggcaactgacgctgagg  
cgcgaaagcgtgggatcaaacaggattagataccctgtagtccacgctgtaaacgatgaatacttgatgtaggaggtatcgacc  
cttctgtgtcgaagttaacgtattaagtattccacactggggagtacggccgca

>GM2GI8201BLSVR

gccccggctaactacgtgccagcagccgcggaatacgtagggggcgagcgtgtccggaattattgggcgtaaaggcggtgtagg  
cggcttttaagtcggaagtgaaaattcatggctcaactgtgaacttgcttacgaaactggaggacttgatcaccagaggggaaggcg  
gaattcctggtgtagcggtaaaatgcgtagagatcaggaagaacaccggtggcgaaggcggccttctggctggcaactgacgctga  
ggcgcgaaagcgtgggatcaaacaggattagataccctgtagtccacgctgtaaacgatgaatacttgatgtaggaggtatcgacc  
cccttctgtgtcgaagttaacgtattaagtattccacactggggagtacggccgca

>GM2GI8201BG5JN

gccacggctaactacgtgccagcagccgcggaatacgtaggtggcgagcgttatccggattactgggtgtaaaggcggtgtaggc  
ggcttttaagtcggaagtgaaaattcatggctcaactgtgaacttgcttacgaaactggaggacttgatcaccagaggggaaggcgg  
aattcctggtgtagcggtaaaatgcgtagagatcaggaagaacaccggtggcgaaggcggccttctggctggcaactgacgctgag

gcgcgaaagcgtgggatcaaacaggattagataccctggtagtcacgctgtaaacgatgagtgtaggtgtctgggagaacctgg  
gtgccacagctaacgcaataaacactccgctggggagtagcacgca

>GM2GI8201ELOS

gccacggctaactacgtgccagcagccgcggaatacgtaggtggcgagcgttatccggattactgggtgtaaagggcgttaggc  
ggtctttaagtcggaagtgaaaattcatggctcaactgtgaactgcttacgaaactggaggacttgagtaccagaggggaaggcgg  
aattcctggtgtagcggtaaaatgcgtagagatcaggaagaacaccgggtggcgaaggcggccttctggctggcaactgacgctgag  
gcgcgaaagcgtgggatcaaacaggatcagataccctggtagtcacgctgtaaacgatgagtgcaagggtgtgggggtcaaac  
ctcggtgccgcttaacacagtaagcactccgctggggagtagcacgca

>GM2GI8201CG2XI

gcacggctaactacgtgccagcagccgcggaatacgtaggtgctagcgttatccggattactgggcgtaaagggcgttaggtg  
gtctttcaagtcggtggttaaaggctacggctcaaccgtattaagccgccgaaactggaagacttgagtgcaggagaggaaagtgg  
attctcagtgtagcggtaaatgcgtagatattgggaagaacaccagtagcgaaggcggcttctggactgcaactgacactgaggc  
acgaaagcgtggtagcaaacaggattagataccctggtagtcacgctgtaaacgatgagtactaggtgtcgggggttaccctc  
ggtgccgcagttaacgcattaagtactccgctggggagtagcacgca

>GM2GI8201DQ01C

gccccgctaactacgtgccagcagccgcggaatacgtagggggcgagcgttgcgggaattattgggcgtaaagggtagctaggc  
ggcttttaagttgacgtgaaagcccgggcttaactccggcgagcgttgaactggagggtgagtgatggaagggacagtgg  
aattcctggtgtagtggtgaaatgcgcagagatcaggaagaataaccagtgccgaaggcggactgtctggacattaactgacgctgag  
tacgaaagcgtggggagcaaacaggatcagataccctggtagtcacgctgtaaacgggtgggtactaggtgtgggatccattccac  
ggattctgtccgtagctaacgcattaagtacccccgctggggagtagcggccgca

>GM2GI8201BM0EK

gtctcggctaactacgtgccagcagccgcggaatacgtagggggcgagcgttatccggattactgggcgtaaagcgcacgcagg  
tggttcgtaagtcggacatgaaagctcccggttaactgggagaggtgttcgatactgcggggctgaggtgggagagggacgtg  
gaattcccgggtgtagtggtggaatgcgtagatcgggaggaacaccagtgccgaaggcggccttggccacacctgacgctga  
ggtgcgaaagcgtggggagcaaacaggattagataccctggtagtcacgctgtaaacgatgtcaactgggtgtcggtagtttac  
tagcgggtccgaagccaacgcgttaagtgaccgctggggactacggccgca

>GM2GI8201A7MME

gccacggctaactacgtgccagcagccgcggaatacgtaggtggcgagcgttgcggattattgggcgtaaagcatgcttaggc  
ggatacttaagtggtatgaaatcccgggctcaacccgggtgctgcattcaaactgggtatctagagtacaggagaggaaagc  
ggaattcctagtgtagcggtaaatgcgtagagattaggaagaacaccagtgccgaaggcggccttctggactgtaactgacgctga  
ggcatgaaagcgtgggtagcaaacaggattagataccctggtagtcacgctgtaaacgatgagtactaggtgtcgggggttcaata  
ctcgggtccgcagttaacacattaagtactccgctgggaagtacgatcgca

>GM2GI8201A64RC

gcaccggctaactcgtgccagcagccgcggaatacgaagggtgcaagcgttaactcgaattactgggcgtaaagcgcgcgtagg  
tggttgataagttgatgtgaaatcccgggctcaacctgggaactgcatccaaaactgtctggctagagtgtggtagagggtagtg  
aattccagtgtagcggtaaatgcgtagatattggaaggaacaccagtgccgaaggcggactacctggactaacactgacactgag



gtgcgaaagcgtggggagcaaacaggattagataccctggtagtccacgccgtaaacgatgtcaactagccgtgggatccttgag  
atcttagtggcgagcctaacgcattaagttgaccgcctggggagtagcggccgca

>GM2GI8201DOJWC

ggtccggctaattacgtgccagcagccgcgtaatacgtaggaccgagcgttgcggaatcattgggcgtaaagagtagctaggc  
ggtatgataagttaggagtaaaaggcaccggctcaaccggcgtaagctttaaaactgtcatactgagacattgaggggaaagtgg  
aatttctagttagcggtagaatgvcgagatattaggaagaataaccagaggcgaaagcgcacttctagcgatgccctgacgctgagg  
acgaaagcgtggggagcaaacaggatcagataccctggtagtccacgctgtaaacgatgaatgtaggtgtgggtgtcaaagctc  
ggtgccgaagttaacacattaagcattccgcctggggagtagcgcacgca

>GM2GI8201CPIH1

gccccggctaactacgtgccagcagccgcgtaatacgtagggggcgagcgttgcggaattattgggcgtaaagggtacgtag  
gcggaactgaaagttgacgtgaaagccccgggctaacccggcgagcgttaaaaactacagggcctgagtgtagaagggatcg  
tggattcctagttagcggtagaatgvcgtagagattaggaagaataaccagtgccgaaggcgactgtctggacattaactgacgctg  
aggtagcgaagcgtggggagcaaacaggatcagataccctggtagtccacgctgtaaacgatgagtgcaagggtgtgggggtcaa  
accccggtgcccgtaacacagtaagcactccgcctggggagtagcgtacgca

>GM2GI8201AGP2N

gctccggctaactccgtgccagcagccgcgtaatacgtagggggcaagcgttgcggaatcattgggcgtaaagcgcacgtagg  
cggctttgtaagttagaggtgaaagcctggagctcaactccagaactgccttgatactgcatggctgaatccaggagaggtgagtg  
aattccgagtgtagaggtgaaattcgtagatattcggagaacaccagtgccgaaggcggctcactggactggtattgacgctgagg  
gcaaaagcgtggggagcaaacaggattagataccctggtagtccacgccgtaaacgatgataactagctgtccgggacttggtgct  
tgggtggcgagcctaacgcattaagttatccgcctggggagtagcggccgca

>GM2GI8201D5A5V

gccccggctaactacgtgccagcagccgcgtaatacgtagggggcaagcgttgcggaatcattgggcgtaaagagcgtgtagg  
cggtcggtaagtcggctgtgaaagtcagggtcaaccctgggatgccggtcgatactgccggactagagttcggagaagggcgag  
tggattcccgggtgtagcggtagaatgvcgagatattcgggaggaacacctatggcgaaggcagctcgctgggacgttactgacgct  
gagacgcgaaagcgtggggagcaaacaggattagataccctggtagtccacgccgtaaacgatgggactaggtgtgggaggtg  
cgactcctccgtgccggagctaacgcattaagttgccccgcctggggagtagcggccgca

>GM2GI8201AYBN6

gggacggctaactacgtgccagcagccgcgtaatacgtagggtcccagcgttgcggaattattgggcgtaaagcgcagcagc  
cggttcttaagtctgaagttaaaggcagtggtcaaccattgtacgctttgaaactggagaactgagtcagaaggggagagtg  
aattccatgtgtagcggtagaatgvcgtagatattgagggaacaccggtggcgaaagcggctctctggtctgtaactgacgctgagg  
tcgaaagcgtggggagcaaacaggattagataccctggtagtccacgccgtaaacgatgagtgtaggtgtagcccttccggg  
cttagtccggagcctaacgcattaagcactccgcctggggagtagcggccgca

>GM2GI8201E3146

gcacggctaactacgtgccagcagccgcgtaatacgtaggggtgcgagcgttgcggaatcattgggcgtaaagagctcgtagg  
gtttgctgcgctggtgtgtaagtccacggcttaactgtgggactgcaggcgatacgggcataactgagtgctgtaggggagactggaa  
ttcctggtgtagcggtagaatgvcgagatattcaggaggaacaccgatggcgaaggcaggtctctgggcagtaactgacgctgagga

gcgaaagcatggtagcgaacaggattagataccctggtagtccatgctgtaaacgggtggcgctagggtgtagtccctccacggg  
gttcgtgccgtagctaacgcattaagcgccccgcctggggagtacggccgca

>GM2GI8201EEB6Z

gcaccggctaactacgtgccagcagccgcggaatacgtagggtgcgagcgtgtccggaattactgggcgtaaagagctcgtagg  
ggtttgcgctcgtttgtgaagtccacggcttaactgtgggactgcaggcgatacgggcataacttgagtgtgtaggggagactgga  
attcctggtagcggtagaaatgcgagatatcaggaggaaacaccgatggcgaaggcaggctctgggcagtaactgacgctgagg  
agcgaagcatggtagcgaacaggattagataccctggtagtccacgctgtaaacgatgaatactgtagtaggaggtatcgacc  
cttctgtgcgaagttaacgtattaagtattccacctggggagtacggccgca

>GM2GI8201AN9P6

gccccggctaactcgtgccagcagccgcggaatacgaagggggctagcgtgtccggaattactgggcgtaaagcgcacgtagg  
cggcttttaagtcggaggtgaaatcctggagctcaactccagaactgccttcgatactggaaagctcgagtcggggagaggtgagt  
gaactgcgagtgtagaggtaaattcgtagatattcgcaagaacaccagtggcgaaggcggctcactggccccggtactgacgctga  
ggtagcgaagcgtggggagcaaacaggattagataccctggtagtccacgctgtaaacgatggatgtagccggtggcgagcttgct  
cgtcagtgccgagctaacgcttaagcatcccgcctggggagtacgggtcgca

>GM2GI8201CABXR

gccccggctaactacgtgccagcagccgcggaatacgtaggggcgagcgtgtccggaattattgggcgtaaagggtagctagg  
cggcttttaagttgacgtgaaagccccgggcttaacccccggcgagcgttaaaaacttcaggccttgagtggtagaagggatcgtgg  
aattcctagtgtagcgtgaaatgctagagattaggaagaataccagtggcgaagcgcacgatcggataccaactgacgctgag  
gcgcaagcgtgggatcaaacaggattagataccctggtagtccacgctgtaaacgatgaatactgtagtaggaggtatcgacc  
ccttctgtgcgaagttaacgtattaagtattccacctggggagtacggccgca

>GM2GI8201C1CUO

gccacggctaactacgtgccagcagccgcggaatacgtaggggcgagcgtgtccggaattactgggcgtaaagagtagtagg  
gggcacttaagtcagatgtgaaatcccgggcttaacctgggagctgcattgatactgggtgtctagagtgcaggagaggaaagtg  
aattcctagtgtagcgtgaaatgctagagattaggaagaacaccagtggcgaaggcgaacttctggactgtaactgacactgagat  
acgaaagcgtggtagcaaacaggattagataccctggtagtccacgctgtaaacgatgaatactaggtgtcggggggtagccacc  
tcggtgccgagcaaacgcattaagtattccgcctggggagtacgggtcgca

>GM2GI8201BKKDN

gccccggctaactacgtgccagcagccgcggaatacgtaggggcgagcgtgtccggaattattgggcgtaaagggtagctagg  
cggcttttaagttgacgtgaaagccccgggcttaactccggcgagcgttgaactggaggccttgagtgtggaagggacagtgg  
aattcctggtagcggtagaaatgctagagatcaggaagaacaccggtggcgaaggcggccttctggtggcaactgacgctgag  
gcgcaagcgtgggatcaaacaggattagataccctggtagtccacgctgtaaacgatgaatactgtagtaggaggtatcgacc  
cttctgtgcgaagttaacgtattaagtattccacctggggagtacggccgca

>GM2GI8201DDH68

gccccggctaactacgtgccagcagccgcggaatacgtaggggcgagcgttatccggattcattgggcgtaaagcgcgtagg  
cggccttctaagtcagaagtaaatgctgggagctcaactccgtctgctttgatactgggaggctcgagtctggcaggggaaggtgg  
aattcccagtgtagcggtagaatgctgagatattgggaagaacaccggtggcgaaggcggccttctggggccacgactgacgctgag

gcgcgaaagctaggggagcgaacaggattagataccctggtagtcctagccgtaaacgatggacactagggtgtgggggaccagat  
cctccgtgccgtagccaacgcattaagtgtcccgcctgggggagtagcggtcgca

>GM2GI8201BQE90

gccacggctaactacgtgccagcagccgcggaatacgtagggtggcgagcgttatccggattactgggtgtaaagggcgtgtagac  
ggatgggtaagttggctgttaacctgggggctaaacccccagcctgcaaccgaaactgctgatcttgagtaccagaggggaaagcg  
gaattcctagtggagcggtaaaatgcatagagattaggaagaacaccggtggcgaaggcggcttctggctggcaactgacgctga  
ggcgcgaaagcgtggggagcaaacaggattagataccctggtagtcacgcagtaaacgatgaatactgtatgtaggaggtatcga  
ccccttctgtgcgaagtaacgtattaagtattccacctggggagtagcaccgca

>GM2GI8201DY2AP

gccccgctaactacgtgccagcagccgcggaatacgtagggcgagcgttgcggaattattggcgtaaaagggtagctaggcg  
gcttttaagttgacgtgaaagccccgggcttaactccggcaagcgttgaaaactggagggcttgagtgatggaagggacagtgga  
attcctggtgtagtggtgaaatgcgagagatcaggaagaataaccagtggcgaaggcgactgtctggacattaactgacgctgaggt  
acgaaagcgtggggagcaaacaggatcagataccctggtagtcacgcgctaaacgatgagcactaggtatcggggtcagaaga  
cttcggtgcccgctaacacattaagcactccgcctggggagtagcaccgca

>GM2GI8201EUJNN

gccacggctaatacgtgccagcagccgcggaatacgtaggtggcaagcgttgcggaattattggcgtaaaagggcgcgagggc  
ggtttcctaagtcctcttagaagtgcggggcttaacccccgtgaggggatggaaacggaggaactggagtgctggagagggaaagtg  
gaattcctggtgtagcggtgaaatgctagagatcaggaagaacaccggtggcgaaggcgacttctggacgacaactgacgctga  
ggcgcgaaagcgtggggagcaaacaggattagataccctggtagtcacgcgctaaacgatgaatactaggtgtaggggggtatcg  
acccccctgtgccgctaacacaataagattccgcctgggaattacgatcgca

>GM2GI8201CTIGX

gccccgctaactcgtgccagcagccgcggaatacgtagggggcgagcgttgcggaattattggcgtaaaagagctcgtagggt  
gttgtcgcgctggttgtaagtccacggcttaactgtgggactgcaggcgatacgggcataactgagtgctgtaggggagactggaa  
ttcctggtgtagcggtgaaatgctagagatcaggaggaacaccgatggcgaaggcaggtctctgggcagtaactgacgctgagga  
gcgaaagcatggtagcgaacaggattagataccctggtagtcacgcgctaaacgatgagtgtagatgctcgaggtaaactggg  
tgtcacaagccaacgcgataaacactccgcctggggagtagcaccgca

>GM2GI8201CCHDV

gccacggctaactacgtgccagcagccgcggaatacgtagggtggcgagcgttatccggattactgggtgtaaagggcgtgtagac  
ggatgggtaagttggctgttaacctgggggctaaacccccagcctgcaaccgaaactgctgatcttgagtaccagaggggaaagcg  
gaattcctagtggagcggtaaaatgcatagagattaggaagaacaccggtggcgaaggcggcttctggctggcaactgacgctgag  
gcgcgaaagatgggtagcgaacaggattagataccctggtagtcacgcgctaaacgatgaatactaggtgtaggggggtatcgac  
ccccctgtccggcgtaaacacaataagattccgcctgggaattacgatcgca

>GM2GI8201CRHFT

gccccgctaactacgtgccagcagccgcggaatacgtagggggcgagcgttgcggaatcattggcgtaaaagagtagcgtaggc  
ggtaagataagttagaagtaaaagcaccggctcaaccggcgtaagcttttaaactgtttactgagacattgagggggaagtgga  
atttctagttagcggtgaaatgctagatattaggaagaataaccagagggcgaagcgaacttctagcgatgatctgacgctgaggtg

cgaaagcgtggaagcaaacaggattagataccctgtagtccacgccgtaaacgatgagtgttagatgtccgaggtaaacttggg  
gtcgaagccaacgcgataaacactccgctggggagtacgcacgca

>GM2GI8201CWFM0

gcccggctaactacgtgccagcagccgcgtaatacgtagggcgcaagcgtgtccggaattattggcgtaaagagctttaggt  
ggcttgcgctgtccgtgaaaccaaggcttaacttggcggtgcggtgggtacgggctggctagagtgtgtaggggagactgga  
attcctggttagcgggtgaaatgcgagatatcaggaggaaacaccgatggcgaaggcaggtctctggccatgactgacactgaga  
agcgaagcatggggagcgaacaggattagataccctgtagtccatgccgtaaacggtggcactaggtgtgggggacattccac  
gtttccgcccgtagctaacgcattaagtccccgcctggggagtacggccgca

>GM2GI8201B7CB3

gccccggctaactacgtgccagcagccgcgtaatacgtagggggcgagcgtgtccggaattattggcgtaaagggtacgtagg  
cggacttgaaagttgacgtgaaagccccggggcttaaccccgcgagcgttaaaactacagggccttgagtgttagaagggtacgtg  
gaattcctagtgtagcgggtgaaatgcgtagagattaggaagaataccagtggcgaagcgacgatctggataccaactgacgctga  
ggtacgaaagcgtgggtagcaaacaggattagataccctgtagtccacgctgtaaacgatgagtgttaggtgtctgggagaacctg  
ggtgccacagctaacgcaataaacactccgctggggagtacgcacgca

>GM2GI8201BB0V9

gccctggctaataatgtgccagcagccgcgtaatacatatggggcgagcgttatccggattattgggtgtaaagggtgcgtaggcg  
ggaaaacaagtcatgttgtaaaccctcgcttaactgaggaattgcagttgaaactatctttagtatcggatgggcaagtggaatt  
tctagttagcgggtgaaatgcgagatattaggaagaacaccagtggcgaaggcgacttgctggacgaaaaactgacgctgaggca  
cgaaagtgtgggtagcaaacaggattagataccctgtagtccacactgtaaacgatggatactagttgttgggttataaatcagtaac  
gtagtaacgcattaagtatcccactgggaagtacgaccgca

>GM2GI8201C669W

gccccggctaactacgtgccagcagccgcgtaatacgtagggggcgagcgtgtccggaatgattggcgtaaagggtacgtagg  
cggtcagaagggtctgttgtaaagccccggggctcaactccgggaggcgtggaactatcggacttgagtgttagaaggacagt  
ggaattcctggttagtggtgaaatgcgagagatcaggaagaataccgggtggcgaagcgactgtctggataccaactgacgctg  
aggtagcgaagcgtggggagcaaacaggatcagataccctgtagtccacgctgtaaacgatgagtgaagggtgtgggggtcaa  
acccccggtgcccggttaacacagtaagcactccgctggggagtacgtacgca

>GM2GI8201EH31I

gccccggctaactacgtgccagcagccgcgtaatacgtagggggcgaggcgtgtccggaattattggcgtaaagggtcgttag  
gcggtcgattgcgtcgggaagtgaaaattcatggctcaactgtgaactgcttacgaaactggaggacttgagtactagaggggaaggc  
ggaattcctagttagcggtaaatgcgtagagattaggaagaacaccgggtggcgaaggcggccttctggctagcaactgacgctg  
aggcgcgaaagcgtggggagcaaacaggattagataccctgtagtccacgcagtaaacgatgaatacttgatgtaggaggtatcg  
accccttctgtgcgaagftaacgtattaagtattccactggggagtacgaccgca

>GM2GI8201BW2AS

gccacggctactacgtgccagcagccgcgtaatacgtaggtggcgagcgttatccggatttactgggtgtaaaggcggttaggcg  
gtcttcaagtcggaagtgaaaattcatggctcaactgtgaactgcttacgaaactggaggacttgagtactagaggggaaggcggga  
atttctagttagcgggtgaaatgcgagatattaggaagaataccagaggcgaagcgacttctagcgtgatctgacgctgaggtga

cgaaagcgtgggaagcaaacaggattagataccctggtagtcacgcccgtaaacgatgagtgtagatgtccgaggtaaacttgggt  
gtcggaaagccaacgcgataaacactccgctggggagtagcacgca

>GM2GI8201BU9PV

gccccggctaactacgtgccagcagccgcgtaatacgtagggggcgagcgttgcggaattattggcgtaaagggtagctagg  
cggactgaaagttgacgtgaaagcccggggcttaaccccgcgagcgttaaaaactacaggccttgagtgtagaagggatcgt  
ggaattcctagtgtagcgggtaaatgcgagatattaggaagaataccagaggcgaagcgacttctagcgtatctgacgctga  
ggtacgaaagcgtgggaagcaaacaggattagataccctggtagtcacgcccgtaaacgatgagtgtagatgtccgaggtaaact  
gggtgtcggaaagccaacgcgataaacactccgctggggagtagcacgca

>GM2GI8201D44LC

gtatcggctaactccgtgccagcagccgcgtaatacggaggatacagcgttatccggattattgggttaaagggtagcagggc  
gtctattaagttggcgtgaaagcccggggcttagctccggtaaagcgttgaaactggtagactgaaatagtggaagagatagtggaatt  
cctagtgtagcgggtaaatgctagagattaggaagaataccaatggcgaagcaactatctggacacatattgacgctgaggtacg  
aaagcgtggggagcaaacaggattagataccctggtagtcacgcccataaacgctgagtgtaggtgtgggggtcaaacctcggt  
gccgacgttaacacagtaagcactccgctggggagtagctacgca

>GM2GI8201EN4NU

gcctcggctaactacgtgccagcagccgcgtaaacgtaggaggcgagcgttatccggattactgggtgtaaagcgcgtgcagg  
cggttcgtaagttggatgtgaaagctcccggctcaactgggagaggcgtacaagactggcggactggagtggtgaaaggaaggt  
ggaattccgggtgtagtggtgaaatgctagatataccggaggaacaccagtgccgaaagcggcctctggaccacaactgacgctc  
agacgcgaaagctagggtagcaaacgggattagagacccccggtagtcctagccgtaaacgatgtgaacttggcggcgttggtg  
aaaccgatcgtgcccgaagcaaacgcgataagttcaccacctggggactacggccgca

>GM2GI8201AMRLF

gcaccggctaactacgtgccagcagccgcgtaatacgtagggtgagcgttgcggaattactggcgtaaagagctcgtagg  
ggttgtcgcgtcgtctgtgaaattccggggcttaactccggcggtgcaggcgatacgggcataactgagtactgtaggggagactgg  
aattcctggtgtagcgggtaaatgcgagatatacaggaggaacaccgggtggcgaagggcgggtctctggcagtaactgacgctgag  
gagcgaagcatgggagcgaacaggattagataccctggtagtcacgcccgtaaacgatgagtgtagatgtccgaggtaaact  
gggtgtcacaagccaacgcgataaacactccgctggggagtagctacgca

>GM2GI8201EEVVK

gccccggctaactacgtgccagcagccgcgtaatacgtagggggcgagcgttgcggaattattggcgtaaagggtagctagg  
cggcttttaagttgacgtgaaagcccggggcttaactccggcaagcgttgaaaactggagggcttgagtgatggaagggacagtgg  
aattcctggtgtagtggtgaaatgcgagagatcaggaagaataccagtgccgaagggcggcttctggctggcaactgacgctgag  
cgcgaagatgggtagcgaacaggattagataccctggtagtcacataaccgtaaacgatgaataactaggtgtaggaggtatcgact  
cttctgtgccgaaacgaacgcattaagtattccacctggggagtagctacgca

>GM2GI8201ETASU

gccacggctaactacgtgccagcagccgcgtaatacgtagggtggcgagcgttatccggattactgggtgtaaagggcgtgtaggc  
ggtcttcaagtcggaagtgaaaattcatggctcaactgtgaacttgctacgaaactggaggacttgagtactagaggggaagggcg  
aattcctagtgtagcggtaaatgctagagattaggaagaacaccgggtggcgaagcgacgatctggataccaactgacgctgag

gtacgaaagcgtggggagcaaacaggattagataccctggtagtcacgcccgtaaacgatgagtgctagatgtcgggtgtcaaagc  
tcggtatcgcggttaacacattaagcactccgctggggagtacgtacgca

>GM2GI8201BTBFR

gtctcggctaactacgtgccagcagccgcggtaaaacgtaggaggcaagcgttatccggattcactgggcgtaaagcgcgtgcagg  
tggcgcggtaaagttgggtgtgaaatctcccggctcaactgggagaggtcattcaatactaccgtgcttgagagcagaagaggaagat  
ggaattcccgggtagtagtggtgaaatgcgtagatatacgggaggaacaccagtgccgaaggcgatcttctggtctgttctgacactcaga  
cgcgacagctagggtagtaaacgggattagagaccccggtaatcctagccgtaaacgatgtgaactggcgttggtgggttaaactc  
catcagtgccgtagcaaacgcgataagttcaccgctggggactacggccgca

>GM2GI8201AHRJD

gccccggctaactacgtgccagcagccgcggtaaacgtagggggcgagcgttgcggaatgattggacgtaaagggcgcgtag  
gcgccctgcaagtcagtagtggaagtcatttcaaggggtggaagtctattgaaactcggggctgagtagggagaggtcatcg  
gaattcccgggtagcgggtgaaatgcgtagagatcgggaggaacaccagtgccgaaggcgggtgactggaccataactgacgctg  
agggcgcgaaagtgtggggagcaaacaggattagataccctggtagtcacacggtaaacgatgaatgccaggtgcagggggatc  
gacccttctgtgccggagtaacacaatgagcattccgctggggagtagcggtcgca

>GM2GI8201CPKP4

ggtccggctaattacgtgccagcagccgcggtaaacgtagggggcgagcgttgcggaatcattgggcgtaaagggtagctaggc  
ggcttttaagttgacgtgaaagcccgggcttaactccggcaagcgttgaactggagggctgagtaggaaagggacagtg  
aattcctggtgtagtggtgaaatgcgtagatcaggaagaataaccagagggcgaagcgacttctagcgtatctgacgctgagg  
tacgaaagcgtgggaagcaaacaggattagataccctggtagtcacgcccgtaaacgatgagtgttagatgtccgaggtaaactgg  
gtgtcacaagccaacgcgataaaactccgctggggagtagcgtacgca

>GM2GI8201D0REA

gccccggctaactacgtgccagcagccgcggtaaacgtagggggcgagcgttatccggaattattgggcgtaaagagtagctagg  
ggctgtgcaagcgcagtggttaagataacggcttaaccgttgcgtagcgaactggacagcttgagtagagagaggaaagcg  
gaattcctagtagcgggtgaaatgcgtagatattaggaagaataaccagagggcgaagcgacttctgacgctgag  
gtacgaaagcgtggggagcaaacaggatcagataccctggtagtcacgcccgtaaacgatgagtgaaggtgtgggggtcaaac  
ctcggtagccggttaacacagtaagcactccgctggggagtagcgtacgca

>GM2GI8201C582P

gccccggctaactacgtgccagcagccgcggtaaacgtagggggcgagcgttgcggaatcattgggcgtaaagagtagctagg  
cggtatgataagtaggagtaaaagcaccggctcaaccggcgtgaagctttaaactgtcacttgagacattgaggggaaagtg  
gaatttctagtagcgggtgaaatgcgtagatattaggaagaataaccagagggcgaagcgacttctagcgtatctgacgctgagg  
tacgaaagcgtgggaagcaaacaggattagataccctggtagtcacgcccgtaaacgatgagtgttagatgtcgggtgtcaaagct  
cggtagcgcggttaacacattaagcactccgctggggagtagcgtacgca

>GM2GI8201BK3L8

gccccggctaactccgtgccagcagccgcggtaaacgtagggggggcaagcgttgcggaattactgggcgtaaagggctcgtaggc  
ggccgttttagtccgacgtgaaatcccacggctcaaccgtggaactgcgtcgataactgaatggcttgaatccaagagagggatg  
gaattccaggttagcgggtgaaatgcgtagatatacgggaggaacaccgggtggcgaaggcggcatcctggattggcattgacgctgat

gagcgaaagccaggggagcaaacgggattagataccccggtagtcctggccctaaacgatgaatgcttggtggtgggtatcgat  
ccccgccgtgccgaagctaacgcattaagcattccgcctggggagtagcggtcgca

>GM2GI8201CR3F5

gccccggctaactacgtgccagcagccgcgtaatacgtaggggagcagcgttgcggaattattgggcgtaaagggtagcagg  
cggcttttaagttgacgtgaaagccccgggcttaactccggcaagcgttgaaaactggagggcttgagtgatggaagggacagtg  
aattcctagtgtagcggtgaaatgcgagatattaggaagaataccagaggcgaagcgcactttctagcgatgatctgacgctgagg  
acgaaagcgtgggaagcaaacaggattagataccctggtagtcacgcgtaaacgatgagtgtagatgtccgaggtaaactgg  
gtgctggaagccaacgcgataaaactccgcctggggagtagcgcacgca

>GM2GI8201AYJVT

gcaccggctaactacgtgccagcagccgcgtaatacgtaggggtgcgagcgttgcggaattactgggcgtaaagagctcgtagg  
ggtttgctgcgctggttgtaagtcacgcgcttaactgtgggactgcaggcgatacgggcataactgagtgctgtaggggagactgga  
attcctggtgtagcggtgaaatgcgagatattaggaagaataccagaggcgaagcgcactttctagcgatgatctgacgctgaggta  
cgaaagcgtgggaagcaaacaggattagataccctggtagtcacgcgtaaacgatgagtgtagatgtccgaggtaaactggg  
gtcgggaagccaatgcgataaaactccgcctggggagtagcgcacgca

>GM2GI8201BAHPE

gcaccggctaactacgtgccagcagccgcgtaatacgtaggggtgcgagcgttgcggaattattgggcgtaaagggctcgtagg  
ggtcgattgctcggaagtggaaacctgcggcttaacctgggctgctccgatacgggtgactgaggaaggtaggggagaatg  
gaattcctggtggagcggtggaatgcgagatatacaggaggaacaccagtgccgaagggcgttctctggacctttctgacgctgag  
gagcgaaagcgtggggagcaaacaggcttagataccctggtagtcacgcgtaaacgggtgggactcgaagtatgcgatatgaca  
gtatgctccaagcgaagtgataagtaatccacctgggaagtacgccggca

>GM2GI8201BKPEV

ggtccggctaattacgtgccagcagccgcgtaatacgtaggggagcagcgttgcggaatcattgggcgtaaagagtagcagg  
ggtagataagttagaagtaaaaggcaccggctcaaccggcgaagcttttaaaactgtttactgagacattgagggggaagtgga  
atttctagtgtagcggtgaaatgcgagatattaggaagaataccagaggcgaagcgcactttctagcgatgatctgacgctgaggta  
cgaaagcgtgggaagcaaacaggattagataccctggtagtcacgcgtaaacgatgaatacttgatgtaggaggtatcgacccc  
ttctgtgcgaagttaacgtattaagattccacctggggagtagcaccgca

>GM2GI8201C61XZ

gccccggctaactacgtgccagcagccgcgtaatacgtaggggagcagcgttgcggaattattgggcgtaaagggtagcagg  
cggcttttaagttgacgtgaaagccccgggcttaactccggcaagcgttgaaaactggagggcttgagtgatggaagggacagtg  
aattcctggtgtagtggtgaaatgcgagagatcaggaagaataccagtgccgaagggcactgtctggacattaactgacgctgagg  
tacgaaagcgtggggagcaaacaggatcagataccctggtagtcacgcgtaaacgatgattactcgaagtatgcgatatgacag  
tatgctccaagcgaagtgataagtaatccacctgggaagtacgccggca

>GM2GI8201AM7NX

gcgccggctaactacgtgccagcagccgcgtaatacgtagggcgaagcgttatccggaattattgggcgtaaagagctcgtagg  
cggttgtcgcgctgctgtgaaagccccgggctcaacccccgggctgcagtgggtacgggcagactagagtgtaggggagact  
ggaattcctggtgtagcggtgaaatgcgagatatacaggaggaacaccgatggcgaagggcaggtctctgggctgtaactgacgctg

aggagcgaagcatggggagcgaacaggattagataccctggtagtcacgtaaacggtggcactaggtgtgggggacattc  
cacgtttccgcccgtagctaacgcattaagtccccgcctggggagtagcggccgca

>GM2GI8201DI53J

gctccggctaactccgtgccagcagccgcggaatacggagggagctagcgttgttcggaattactgggcgtaaacgcacgtagg  
cggctttgtaagttagaggtgaaagcctggagctcaactccagaattgcctttaagactgcatcgcttgaatccaggagaggtgagtg  
aattccgagtgtagaggtgaaattcgtagatattcggagaacaccagtgggcgaaggcggctactggactggtattgacgctgaggt  
gcgaaagcgtggggagcaaacaggattagataccctggtagtcacgcccgtaacgatgataactagctgtccgggaacttggtttt  
gggtggcgagctaacgcattaagtatccgcctggggagtagcggccgca

>GM2GI8201CYADZ

gccccggctaactcgtgccagcagccgcggaatacgaagggggctagcgttctcgggaattactgggcgtaaacgggcgtagg  
cggacagtttagtagaggtgaaagcccagggtcaacctggaattgcctttgatactggctgtcttgagttcgggagaggtgagtg  
aatgccgagtgtagaggtgaaattcgtagatattcggcgaacaccagtgggcgaaggcgcactcactggccccgatactgacgctgag  
gcgcgaaagcgtggggagcaaacaggattagataccctggtagtcacgcccgtaacgatgagtgtagttgtcggcatgcatgca  
tgtcggtagcagctaacgcattaagcactccgcctggggagtagcggctcgca

>GM2GI8201AKMCE

gcacggctaactctgtgccagcagccgcggaatacagaggggtgcaagcgttaacggaattactgggcgtaaacgcgcgtaggt  
ggtttgtaagttgtagtgaatccccgggctcaacctgggaactgcatccaaaactggcaagctagatggttagaggggtggtg  
aattcctgtgtagcgggtgaaatgcgtagatattaggaaggaacaccagtgggcgaaggcgaccacctggactgatactgacactgag  
gtgcgaaagcgtggggagcaaacaggattagataccctggtagtcacgcccgtaacgatgcaactagccgttggaatcctgag  
attttagtggcgagctaacgcattaagttgaccgcctggggagtagcggccgca

>GM2GI8201D5S2I

ggtccggctaattacgtgccagcagccgcggaatacgtaggtgacaagcgttctcgggaatcattgggcgtaaacgggtacgtaggc  
ggctaattaagttaggagtgaaaagccatagctcaactatagtaagcttttaaactgattagcttgagtaattgaagggtgagtggaat  
tcctagtgtagcgggtgaaatgcgtagatattaggaagaataaccagtgggcgaaggcgactactggcaattaactgacgctgaggtac  
gaaagcgtgggtagcaaacaggattagataccctggtagtcacgcccgtaacgatgagtgtaggtgtctgggatagactgggtgcc  
atagctaacgcattaagtagccccgcctggggagtagcggccgca

>GM2GI8201B1KFC

gtcacggctaactacgtgccagcagccgcggaatacgtaggtgacaagcgttctcgggattactgggcgtaaacgagcgcgaggg  
cggctgtcaagtcgagtgtaaagccccggctcaactggggagggcattcgatactgatcgactcgaaggcaggagagggaa  
gtggaattcccgggtgtaggtgaaatgcgtagatattcgggaggaacaccagtgggcgaaggcgacttctggcctgttctgacgctg  
aggcgcgaaagctaggggagcaaacgggattagatacccccgtagtcctagccgtaaacgatggacactaggtgttggtggtatca  
accccgcagtgccgaagctaacgcattaagttccgcctggggagtagcggccgca

>GM2GI8201DCE4X

gcacggctaactcgtgccagcagccgcggaatacgaaggggtgcaagcgttactcgggaattactgggcgtaaacggtgcgtaggt  
ggtcgttaagtcggttgaaagccctgggctcaacctgggaactgcagtggtactgggcgactagagtggttagagggtagcgg  
aattcctggtgtagcagtgaaatgcgtagagatcaggaggaacatccatggcgaaggcagctacctggaccaactgacactga



ggcacgaaagcgtggggagcaaacaggattagataccctggtagtcacgcgcctaaacgatgccaactggatgttgggtgcaattt  
ggcacgcagtatcgaagctaacgcgtaagttcgccgcctggggagtacggtcgca

>GM2GI8201DC9EM

gcaccggctaactacgtgccagcagccgcggttaatacgtagggtgcgagcgttaacggaattactgggcgtaaagcgggagcag  
acggttacttaagcaggatgtgaaatccccgggtcaacctgggaactgcgttctgaactggtaactagagtgtgcagaggggggt  
agaattccacgtgtagcagtgaaatgcgtagagatgtggaggaataccgatggcgaaggcagccccctgggataaacactgacgttc  
aagccccgaaagcgtggggagcaaacaggattagataccctggtagtcacgcgcctaaacgatgtcaattagctgttggggcactga  
tgcttagtagcgtagctaacgcgtgaaattgaccgcctggggagtacggtcgca

>GM2GI8201EV3FJ

ggatcggctaactccgtgccagcagccgcggttaatacggaggatccaagcgttatccggattattgggttaaggggtgcgtaggcg  
gcttttaagtcaggggtgaaagacggtagctcaactatcgacgtgcccttgatactgaagagctgaatggactagaggtagggcga  
atgtgacaagtagcggtgaaatgcatagatatgtcacagaacaccgattgcgaaggcagcttactatggtttattgacgtgaggcac  
gaaagcgtgggatcaaacaggattagataccctggtagtcacgcgcctaaacgatgaatactcgctgttagcgatacacagttagc  
ggctaagcgaagcgttaagtattccacctggggagtacggtcgca

>GM2GI8201DDY4J

ggaccggctaactacgtgccagcagccgcggtgatacgtagggtccgagcgttgcggaattattgggcgtaaagggctttaggc  
ggttcgtcgcgtcaggagtgaaaactcggggcctaaccctgagcctgctttgatacgggaggactagaggatgcaggggagaaac  
ggaattcctggtggagcgggtgaaatgctgagatatacaggaggaacaccgggtggcgaaggcgttctctgggcatcacctgacgctg  
agaagcgaagcgtggggagcaaacaggcttagataccctggtagtcacgcgcgtaaacggtgggcactaggtgtgggggacatt  
ccacgttctccgtgccgaagctaacgcattaagtccccgcctggggagtacggccgca

>GM2GI8201AIYEM

gcaccggccaactacgtgccagcagccgcggttaatacgtagggtgcgagcgttgcggaattattgggcgtaaagggctcgtagg  
cggtttgtcgtcgggagtgaaaactcagggttaaccctgagcctgcttccgatacgggcagactgaggatgcaggggagaaac  
ggaattcctggtgtagcggtgaaatgctgagatatacaggaggaacaccgggtggcgaaggcgttctctgggcattacctgacgctg  
ggagcgaagtggtgggagcgaacaggattagataccctggtagtcacaccgtaaacggtgggcgctaggtgtgggactcattcc  
acgagttccgtgccgagctaacgcattaagcggcccgctggggagtacggccgca

>GM2GI8201A43CH

gccacggctaactacgtgccagcagccgcggttaatacgtagggtgcaagcgttatccggaattattgggcgtaaagcgcgctagg  
cggcgagattagtctgatgtgaaagccccgggtcaaccggggaaggtcattgaaactgttcgcttgagtgcagaagaggagagt  
ggaattccatgtgtagcggtgaaatgctgagagatatacaggaggaacaccgatggcgaaggcggctctctggtctgcaactgacgctg  
atgtgcgaaagcgtggggatcaaacaggattagataccctggtagtcacgcgcgtaaacgatgagtgttaaggttaggggttccgc  
cccttagtctgagcaaacgcattaagcactccgcctggggagtacggccgca

>GM2GI8201A3V3X

gcaccggctaactctgtgccagcagccgcggttaatacagagggtgcaagcgttaacggaattactgggcgtaaagcgcgctagg  
tggtttgtaagtgaatgtgaaatccccgggtcaacctgggaactgcatccaaaactggcaagctagagtgggagagggtggtg  
gaatttctgtgtagcggtgaaatgctgagatatacaggaggaacaccgatggcgaaggcggaccacctgggtcactgacactga

ggtgcgaaagcgtggggagcaaacaggattagataccctggtagtcacgcccgtaaacgatgtcaactagccgttgggagcttga  
actcttagtggcgagctaacgcattaagtgaccgcctggggagtacggccgca

>GM2GI8201DHKQV

gcaccggctaactccgtgccagcagccgcgtaatacaggggtgcaagcgttaacggaattactgggcgtaaagcgcacgcagg  
cggctcttaagtacgatgtgaaatccccgggctaactgggaactgcattgaaactggcaggcttgagctttagaggggtagaa  
ttccaggttagcgggtgaaatgctgtagagatctggaggaataaccgggtggcgaaggcggccccctggacaaagactgacgctcagg  
tgcgaaagcgtggggagcaaacaggattagataccctggtagtcacgcccgtaaacgatgtcgacttggagggtgtcccttgagga  
gtggctccggagctaacgcgttaagtcgaccgcctggggagtacggccgca

>GM2GI8201BQOBI

gcaccggctaactacgtgccagcagccgcgtaatacgtaggggtgcaagcgttgcggaattattgggcgtaaagagctcgtaggc  
ggtttctgcgctctgtgaaatcccgggctcaacctcgggctgagtggttacgggcagactagagtgccgttaggggagattgg  
aattcctggttagcgggtgaaatgctgagatatacaggaggaacaccgatggcgaaggcagatctctggccgtaactgacgctgag  
gagcgaagcatggggagcgaacaggattagataccctggtagtcacgcccgtaaacggtgggcgctagatgtagggaccttcca  
cggtttctgtctgtagtaacgcattaagcgcctggggagtacggccgca

>GM2GI8201D86XN

gccccggctaactacgtgccagcagccgcgtaatacgtagggggcgagcgttgcggaattattgggcgtaaagggtagctagg  
cggactgaaagttgacgtgaaagccccgggctaaccggcgagcgttaaaaactcaggccttgagtggtagaagggatcgtg  
gaattcctagtgtagcgggtgaaatgctgtagagattaggaagaataaccagtggcgaagcgcagatctggataccaactgacgctga  
ggtacgaaagcgtggggagcaaacaggattagataccctggtagtcacgcccgtaaacgatgagcactaggtatcggggtagaa  
gacttcggtgcccgtaacgcattaagtgctccgcctggggagtacgtacgca

>GM2GI8201EO61I

gccccggctaactacgtgccagcagccgcgtaatacgtagggggcgagcgttgcggaattattgggcgtaaagggtagctagg  
cggactgaaagttgacgtgaaagccccgggctaaccggcgagcgttaaaaactacaggccttgagtggtagaagggatcgtg  
ggaattcctagtgtagcgggtgaaatgctgtagagattaggaagaataaccagtggcgaagcgcagatctggataccaactgacgctg  
aggtagcgaagcgtgggtatcgaacaggattagataccctggtagtcacgcccgtaaacgatgattactcgaagtatgcatatgac  
agtagctccaagcgaagtgataagtaaccacctgggaagtacgcccgca

>GM2GI8201A96GY

gccacggctaactacgtgccagcagccgcgtaatacgtaggtggcgagcgttatccggattactgggtgtaaagggcgtgtagac  
ggatggtaagttggctgttaacctgggggctaaccggcagcctgcaaccgaaactgctgatctgagtaccagaggggaaagcg  
gaattcctagtgtagcgggtgaaatgctgtagagatcaggaagaataaccagtggcgaagcgcagcgtctggataccaactgacgctg  
aggtagcgaagcgtggggagcaaacaggatcagataccctggtagtcacgctgtaaacgatgagtctagatgtcgggtgtcaaa  
gccccgtatcgccgtaacacattaagcactccgcctggggagtacgtacgca

>GM2GI8201AZEC2

gccccggctaactacgtgccagcagccgcgtaatacgtagggggcgagcgttgcggaattattgggcgtaaagggtagctaggc  
ggcttttaagttgacgtgaaagccccgggctaactccggcaagcgtgaaaactggaagccttgagtgatggaagggacagtgg  
aattcctggtgtagtggtgaaatgctgtagagatcaggaagaataaccagtggcgaaggcactgtctggacattaactgacgctgagg

tacgaaagcgtggggagcaaacaggattagataccctggtagtcataaccgtaaacgatgaatactagggttaggaggtatcgactc  
cttctgtgccgaaacgaacgcattaagtattccacctggggagtagcatcgca

>GM2GI8201B64NO

gccacggctaactacgtgccagcagccgcggaatacgtaggggtgcgagcgtaatcggaattactgggcgtaaagcgtgcgcagg  
cggttttaagacaggcgtgaaatccccgggcttaacctgggaactgcgcttgtagctggaaggctagagtacggcagaggggggtg  
gaattccacgtgtagcagtgaaatgcgtagagatgtggaggaacaccaatggcgaaggcagccccctgggcccatactgacgctc  
atgcacgaaagcgtgggtagcaaacaggattagataccctggtagtcacgcctaaacgatgtcaactagggtgtgggtgggtaaa  
accatttagtaccgtagctaacgcgtgaagttgaccgcctggggagtagcggccgca

>GM2GI8201EXS9C

gccccggctaactacgtgccagcagccgcggaatacgtagggggcaagcgtgtccggaattattgggcgtaaagggtagctagg  
cggcttgacacgttagcgttaaagtggggctcaactcccatttgcgttaaaaacggtgaagcttgagtggtagaggggatcgtgga  
attcctggtgtagcgggtgaaatgcgtagagatcaggaagaataaccagtggcgaagcgcggtctggataccaactgacgctgagg  
tacgaaagcgtggggagcaaacaggatcagataccctggtagtcacgcctgaaacgatgagtgaaggtgtgggggtcaaact  
cgggtcccggtaacacagtaagcactccgcctggggagtagctacgca

>GM2GI8201BD4IX

gccccggctaactacgtgccagcagccgcggaatacgtagggggcgagcgtgtccggaattattgggcgtaaagggtagctagg  
cggcttgacacgttagcgttaaagtggggctcaactcccatttgcgttaaaaacggtgaagcttgagtggtagaggggatcgtgga  
attcctggtgtagcgggtgaaatgcgtagagatcaggaagaataaccagtggcgaagcgcggtctggataccaactgacgctgagg  
tacgaaagcgtggggagcaaacaggattagataccctggtagtcacgcctgaaacgatgagtgttagatgtccgaggtaaactgg  
gtgtcgggaagccaacgcgataaaactccgcctggggagtagcgcacgca

>GM2GI8201AWESU

gccccggctaactacgtgccagcagccgcggaatacgtagggggcgagcgttatccggaattattgggcgtaaagagtgctagg  
ggctgtgcaagcgcagtggttaagataacggcttaaccgttgatgccgagcgaactggacagcttgagtacaggagaggaaagcg  
gaattcctagtagcgggtgaaatgcgtagatattaggaagaataaccagagggcgaagcgcgactttctagcgcgatgatctgacgctgag  
gtacgaaagcgtgggaagcaaacaggattagataccctggtagtcacgcctgaaacgatgagtgttagatgtccgaggtaaactgg  
ggtgtcgggaagccaacgcgataaaactccgcctggggagtagcgcacgca

>GM2GI8201CXC6T

ggtccggctaattacgtgccagcagccgcggaatacgtagggggcgagcgtgtccggaatcattgggcgtaaagagtagctaggc  
ggtaagataagftagaagtaaaagcaccggctcaaccggcgtgaagctttaaaactgtttactgagacattgagggggaagtgga  
atttctagtagcgggtgaaatgcgcagatattaggaagaataaccagagggcgaagcgcgactttctagcgcgatgatctgacgctgaggta  
cgaagcgtgggaagcaaacaggatcagataccctggtagtcacgcctgaaacgatgagtgttagatgtccgaggtaaactgg  
ggtgccggtaacacagtaagcactccgcctggggagtagcgcacgca

>GM2GI8201EA65P

gtatcggctaactccgtgccagcagccgcggaatacggaggatacgcggttatccggattattggttaaaaggggtcggcagggcg  
gtctgtcaagtcaggggtgaaaagccgaggctcaaccttggtcttgctgaaactgggtggactggagagtacatgatgtggcggaa  
tgcgtagtagcgggtgaaatgcatagatattacgcagaactccgattgcgaagggcagctcacaaaagtatatctgacgctgaggca

cgaaagcgtgggtatcgaacaggattagataccctgtagtccacgccgtaaacgatgattactcgaagtatgcatatgacagtatg  
ctccaagcgaaagtataagtaatccacctgggaagtacgccggca

>GM2GI8201EB2B4

gggccggctaattacgtgccagcagccgcgtaatacgtaggaccgagcgttgcggaatcattggcgtaaagagtacgtaggc  
ggtaagataagttagaagtaaaaggcaccggctcaaccggcgtaagctttaaaactgtttacttgagacattgaggggaaagtgg  
atttctagttagcgggtgaaatgctgcagatattaggaagaataaccagtggcgaagcgacgatctggataccaactgacgctgaggt  
acgaaagcgtggggagcaaacaggattagataccctgtagtccacgccgtaaacgatgagtgtagatgtcgggtgcaaaagctc  
ggatcgcggtaaacacattaagcactccgcctggggagtacgtacgca

>GM2GI8201DDBIX

gccccggctaactacgtgccagcagccgcgtaatacgtagggggcgagcgttgcggaattattggcgtaaagggtagctagg  
cggcttttaagttgacgtgaaagccccgggcttaactccggcaagcgttgaaaactggagggcttgagtatggaagggacagtgg  
aattcctggtgtagtggtaaatgctgcagagatcaggaagaataaccagtggcgaaggcgactgtctggacattaactgacgctgag  
tacgaaagcgtggggagcaaacaggattagataccctgtagtccacgccgtaaacgatgagcactaggtatcggggtcagaaga  
cttcggtgcccgtaaacgcattaagtgtccgcctggggagtacgtacgca

>GM2GI8201CYGYU

gccacggctaactacgtgccagcagccgcgtaatacgtaggtggcgagcgttgcggaattattggcgtaaagggtagctagac  
ggatgggtaagttggctgttaacctgggggctaaacccccagcctgcaaccgaaactgctgatcttgagtaccagaggggaaagcg  
gaattcctagtggagcggtaaaatgcatagagattaggaagaacaccggtggcgaaggcggcttctggacgacaactgacgctga  
ggtacgaaagcgtggggagcaaacaggatcagataccctgtagtccacgctgtaaacgatgagtgaaggtgtgggggtcaaa  
cctcgggtgcccgtaaacacagtaagcactccgcctggggagtacgtacgca

>GM2GI8201EC4PA

gccccggctaactacgtgccagcagccgcgtaatacgtagggggcgagcgttgcggaattattggcgtaaagggtagctagg  
cggcttttaagttgacgtgaaagccccgggcttaactccggcaagcgttgaaaactggagggcttgagtatggaagggacagtgg  
aattcctggtggagcgggtgaaatgctgcagatcaggaggaacaccagtggcgaaggcggcttctggaccttctgacgctgag  
agcgaagcgtggggagcaaacaggcttagataccctgtagtccacgctgtaaacgatgagtgaaggtgtgggggtcaaacct  
cgggtgcccgtaaacacagtaagcactccgcctggggagtacgtacgca

>GM2GI8201CWUSH

gccccggctaactacgtgccagcagccgcgtaatacgtagggggcgagcgttgcggaattattggcgtaaagggtagctagg  
cggcttttaagttgacgtgaaagccccgggcttaactccggcaagcgttgaaaactggagggcttgagtatggaagggacagtgg  
aattcctggtgtagtggtaaatgctgcagagatcaggaagaataaccagtggcgaagcgacggtctggataccaactgacgctgag  
gtacgaaagcgtggggagcaaacaggatcagataccctgtagtccacgctgtaaacgatgagtgttagatgtcgggtgcaaaagc  
cgggtatcgcggtaaacacattaagcactccgcctggggagtacgtacgca

>GM2GI8201AX8K7

gggccggctaattacgtgccagcagccgcgtaatacgtaggaccgagcgttgcggaatcattggcgtaaagagtacgtaggc  
ggtaagataagttagaagtaaaaggcaccggctcaaccggcgtaagctttaaaactgtttacttgagacattgaggggaaagtgg  
atttctagttagcgggtgaaatgctgcagatattaggaagaataaccagagggcgaagcgacttctagcgtatgctgacgctgaggt

cgaaagcgtgggtatcgaacaggattagataccctgtagtccacgccgtaaacgatgattactcgaagatgcgatatgacagtatg  
ctccaagcgaaagtataagtaatccacctgggaagtacgccggca

>GM2GI8201D90E8

gccccggcgaactacgtgccagcagccgcggaatacgtagggggcaagcgttgcggaattattgggcgtaaagggtacgtag  
gcccgtgacacgtttagcgtttaaagtggggctcaactcccatttgcgttaaaaacggggaagccttgagtgtagaggggatcgtg  
aattcctggtgtagcggtagaatgtagatagatcaggaagaataaccagtgccgaaagcgacgatctggataccaactgacgctgag  
gtacgaaagcgtggggagcaaacaggattagataccctgtagtccacgccgtaaacgatgagtgctagatgctgggtgcaaacg  
tcggtatcgcggttaacacattaagcactccgctggggagtagctacgca

>GM2GI8201D1JDQ

gtatcgtaactccgtgccagcagccgcggaatacggaggatacagcgttatccggattattgggttaaagggtgctcagggcg  
tctgtcaagtcaggggtgaaaagccgagggctcaacctggcttgccttgaaactgagggactggagagtacatgatgtggcgga  
atgctgtagttagcggtagaatgcatagatattacgcagaactccgattgcgaaggcagctcacaaggtatgctgacgctgagggc  
acgaaagcgtgggtatcgaacaggattagataccctgtagtccacgccgtaaacgatgattactcgaagatgcgatatgacagtat  
gctccaagcgaaagtataagtaatccacctgggaagtacgccggca

>GM2GI8201ASEG9

ggtccggctaattacgtgccagcagccgcggaatacgtaggaccgagcgttgcggaatcattgggcgtaaagagtacgtaggc  
ggtaagataagttagaagtaaaaggcaccggctcaaccggcgtaagctttaaactgtttacttgagacattgaggggaaagtgga  
atttctagtagcggtagaatgtagatattaggaagaataaccagagggcgaagcgacttctagcgtatctgacgctgaggtg  
cgaaagcgtggggagcaaacaggattagataccctgtagtccacgcataaacgctgagtgctaggtgtgggggtcaaacctcg  
gtgccagcgttaacacattaagcactccacctggggagtagcacgca

>GM2GI8201ANAPP

gtatcggctaactccgtgccagcagccgcggaatacgtaggaccgagcgttgcggaatcattgggcgtaaagagtacgtaggc  
ggatgggtaagttgctgtttaaactgggggtaaacccccagcctgcaaccgaaactgctgatcttgagtaccagaggggaaagcg  
gaattcctagtagcggtagaatgtagatattaggaagaataaccagagggcgaagcgacttctagcgtatctgacgctgaggtg  
gtagcgaagatgggtagcgaacaggattagataccctgtagtccacgcataaacgctgagtgctaggtgtgggggtcaaacctcg  
ccttctgtgccgaaacgaacgattaagtattccacctggggagtagcacgca

>GM2GI8201CFR8Z

ggtccggctaattacgtgccagcagccgcggaatacgtaggaccgagcgttgcggaatcattgggcgtaaagagtacgtaggc  
ggtaagataagttagaagtaaaaggcaccggctcaaccggcgtaagctttaaactgtttacttgagacattgaggggaaagtgga  
tttctagtagcggtagaatgtagatattaggaagaataaccagagggcgaagcgacttctagcgtatctgacgctgaggtg  
gaaagcgtggggagcaaacaggattagataccctgtagtccacgccgtaaacgatgagcactaggtatcggggcagaagact  
cgggtccgcttaacgcattaagtctccgctggggagtagctacgca

>GM2GI8201E6H7X

ggtccggctaattacgtgccagcagccgcggaatacgtaggaccgagcgttgcggaatcattgggcgtaaagagtacgtaggc  
ggtcagaagggctgtgtgaaaagcccggggctcaactccgggagggcgtggaactatcggacttgagtgtagaagggacagtg  
gaattcctggtgtagtggtgaaatgtagatagatcaggaagaataaccggtagcgaagcgactgtctggataccaactgacgctga

ggtacgaaagcgtgggtagcaaacaggattagataccctggtagtcacgccgtaaacgatgagtgctagacgtcgggtgtcaaag  
cccgggtccgccgtaaacacagtaagcactccgctggggagtacgcacgca

>GM2GI8201C7TAW

ggtccggctaattacgtgccagcagccgcgtaatacgtaggaccgagcgttgcggaatcattgggcgtaaagagtacgtaggc  
ggtaagataagttaggagtaaaaggcaccggctcaaccggcgtaagctttaaaactgtttacttgagacattgagggggaagtggg  
atttctagtgtagcgggtaaatgctgagatattaggaagaataccaatggcgaagcaactatctgggcacatattgacgctgaggta  
cgaaagcgtggggagcaaacaggattagataccctggtagtcacgccataaacgctgagtgctaggtgtgggggtcaaacctg  
gtccgacgttaaacacattaagcactccacctggggagtacgcacgca

>GM2GI8201CXX7D

gccccggctaactacgtgccagcagccgcgtaatacgtagggggcgagcgttgcggaattattgggcgtaaagggtagctagg  
cggcttttaagttgacgtgaaagccccgggcttaactccggcaagcgttgaaaactggagggcttgagtgatggaagggacagtg  
aattcctggtgtagtggtgaaatgctgtagagattaggaagaataaccagtggcgaagcgacgatctggataccaactgacgctgag  
gtacgaaagcgtggggagcaaacaggattagataccctggtagtcacgccgtaaacgatgagtgctagatgtcgggtgtcaaagc  
tcggtatcggcttaaacacattaagcactccgctggggagtacgtacgca

>GM2GI8201EHHXK

gtatcggctaactccgtgccagcagccgcgtaatacggaggatacgcgcttaccggattattgggttaaaagggtagcagggc  
gtctgtcaagtcaggggtgaaaagccgaggtcaacctggcttgccttgaaactggtggactggagagtagatgtggcgga  
atcgtagtgtagcgggtaaatgctgtagagattaggaagaacaccggtggcgaagggccttctggctagcaactgacgctgagg  
cgcgaagcgtggggagcaaacaggattagataccctggtagtcacgcagtaaacgatgaatacttgatgtaggaggtatcgacc  
ccttctgtgcgaagtaacgtattaagtattccacctggggagtagcagccgca

>GM2GI8201EX4Q5

ggtccggctaattacgtgccagcagccgcgtaatacgtaggaccgagcgttgcggaatcattgggcgtaaagagtacgtaggc  
ggtatgataagttaggagtaaaaggcaccggctcaaccggcgtaagctttaaaactgtcacttgagacattgaggggaaagtgg  
aatttctagtgtagcgggtaaatgctgagatattaggaagaataaccagaggcgaagcgacttctagcgtatctgacgctgagg  
acgaaagcgtgggaagcaaacaggattagataccctggtagtcacgccgtaaacgatgagcactaggtatcggggtcagaaga  
cttcgggtccgccgtaaacgcattaagtctccgctggggagtagcagccgca

>GM2GI8201EQJ3M

gccccggctaactacgtgccagcagccgcgtaatacgtagggggcgagcgttaccggaattattgggcgtaaagagtgcgtaggt  
ggctgtgcaagcgcagtggttaagataacggcttaaccgttgcgagcgaactggacagcttgagtagcaggagaggaaagcg  
gaattcctagtgtagcgggtaaatgctgtagatattaggaagaacaccagaggcgaagggcgttctggactgcaactgacgctgag  
gagcgaagcgtggggagcaaacaggcttagataccctggtagtcacgcgtaaacgggtgggtactaggtgtgggatccattcca  
cggattctgtgccgtagtaacgcattaagtaccccgctggggagtagcggccgca

>GM2GI8201DB1TY

gccccggctaactacgtgccagcagccgcgtaatacgtagggggcgaaagcgttgcggaattattgggcgtaaagggtagctag  
gctgctgacacgcttagcgttaagtgggggctcaactcccattgctgtaaaaacgggaagcctgagtgtagaggggatcgtgg  
aattcctggtgtagcgggtaaatgctgtagagatcaggaagaataaccagtggcgaagcgacggtctggataccaactgacgctgag

gtacgaaagcgtggggagcaaacaggatcagataccctgtagtccacgctgtaaaccggtgggtactaggtgtgggatccattcca  
cggattctgtgccgtagctaacgcattaagtacccccgctggggagtacggccgca

>GM2GI8201CE2GZ

gtatcggctaactccgtgccagcagccgcggaatacggaggatacagcgttatccggattattgggtttaaagggcgcagggcg  
gtctgtcaagtcaggggtgaaaagccgaggctcaacctggcttggccttgaaactggtggactggagagatcatgatgtggcgga  
atgcgtagttagcggtgaaatgcatagatattacgcagaactccgattgcgaaggcagctcaciaaagtatactgacgctgaggta  
cgaaagcgtgggaagcaaacaggattagataccctgtagtccacgccgtaaaccgatgagtgtagatgtccgaggtaaactgggt  
gtcggaaagccaacgcgataaacactccgctggggagtacgcacgca

>GM2GI8201BDSKW

ggtagccgctaattacgtgccagcagccgcggaatacgtaggaccgagcgttgcggaatcattgggcgtaaagggtagcag  
gcggtctattaagttggcgtgaaagcccggttagctccggtaagcgttgaaactggttagactgaaatagtggaagagatagtg  
gaattcctagttagcggtgaaatgctagagattaggaagaataccaatggcgaaagcaactatctggacacatattgacgctgag  
gtacgaaagcgtggggagcaaacaggattagataccctgtagtccacgccataaacgctgagtgtaggtgtgggggtcaaacc  
tcggtgccgacgttaacacattaagcactccacctggggagtacgcacgca

>GM2GI8201DE239

ggtagccgctaattacgtgccagcagccgcggaatacgtaggaccgagcgttgcggaatcattgggcgtaaagggtagcag  
ggtaagataagttagaagtaaaaggcaccggctcaaccggcgtgaaactgtttacttgagacattgaggggaaagtggg  
atttctagttagcggtgaaatgctgagatattaggaagaataccagtgccgaaaggcactgtctggacattaactgacgctgaggta  
cgaaagcgtggggagcaaacaggatcagataccctgtagtccacgctgtaaaccgatgagtgcaaggtgtgggggtcaaacctc  
ggtagccgcttaacacagtaagcactccgctggggagtagcagca

>GM2GI8201CEMBS

gccacggctaactacgtgccagcagccgcggaatacgtaggggcagcgttatccggattactgggtgtaaagggcgtgtaggc  
ggctttcaagtcggaagtgaaaattcatggctcaactgtgaactgcttacgaaactggaggacttgagtactagaggggaaaggcg  
aattcctagttagcggtgaaatgctgagatattaggaagaataccagtgccgaaaggcggccttctggctagcaactgacgctgag  
gctgaaagcgtggggagcaaacaggattagataccctgtagtccacgccgtaaaccgatgaatactaggtgtagggggtatcga  
ccccctgtgccgctaacacaataagtattccgctgggaattacgatcgca

>GM2GI8201EPNCS

gccccggctaactacgtgccagcagccgcggaatacgtaggggcagcgttgcggaatcattgggcgtaaagggtagcagtagg  
cgtaagataagttagaagtaaaaggcaccggctcaaccggcgtgaaactgtttacttgagacattgaggggaaagtgg  
aatttctagttagcggtgaaatgctgagatattaggaagaataccagaggcgaagggcggccttctggctagcaactgacgctgag  
acgaaagcgtgggaagcaaacaggattagataccctgtagtccacgccgtaaaccgatgagtgtagatgtccgaggtaaactgg  
gtgtcacaagccaacgcgataaacactccgctggggagtagcagca

>GM2GI8201D677W

gccccggctaactacgtgccagcagccgcggaatacgtaggggcagcgttgcggaattattgggcgtaaagggtagcagtagg  
cggactgaaagttgacgtgaaagcccggttaacccggcagcgttaaaactacaggccttgagtgtagaagggatcgt  
ggaattcctagttagcggtgaaatgctgagatattaggaagaataccagtgccgaaagcagcggctggataccaactgacgctg

aggtacgaaagcgtggggagcaaacaggatcagataccctgtagtccacgctgtaaacgatgagtgctagatgtcgggtgtcaaa  
gcccggatcgcgtaaacacattaagcactccgcctggggagtagctacgca

>GM2GI8201E381L

gccccggctaactacgtgccagcagccgcgtaatacgtagggggcgagcgtgtccggaatgattgggtgtaaagggtacgcagg  
cggctattaagtttgcgtaaaagcccggggcttagctccggtaagcgttgaaaactggtagactgaaatggaagagatagtg  
aattcctagtagcggtaaatgcgtagagatcaggaagaataaccagtggcgaaggcactgtctggacattaactgacgctgagg  
tacgaaagcgtggggagcaaacaggatcagataccctgtagtccacgctgtaaacgatgagtgaagggtgtgggggtcaaac  
ccggtgccgtaaacacagtaagcactccgcctggggagtagctacgca

>GM2GI8201D4HXP

gtctcggctaactacgtgccagcagccgcgtaaacgtaggaggcgagcgttatccggattactggcgtaaagcgcacgcagg  
tgctgtgcaagtcggacatgaaagctcctggcttaactgggagaggtggttcgaaaactgcatggctgagggtgggagaggacgt  
ggaattcccggtagtggtggaatgcgtagatcgggaggaacaccagtggcgaagcggcgtcctggcccacacctgacgctg  
aggtgcgaaagcgtggggagcaaacaggattagataccctgtagtccacgctgtaaacgatgtcaactagggtgctggcagtttac  
actggcgtgccgaagccaacgcgttaagttgaccgctggggactacgcccga

>GM2GI8201DIV9G

gccccggctaactacgtgccagcagccgcgtaatacgtagggggcgagcgtgtccggaattattggcgtaaagggtacgtagg  
cggcttttaagttgacgtgaaagcccggggcttaaccccggcgagcgttaaaaactacaggccttgagtggtagaagggtacgtgga  
attcctagtagcggtaaatgcgtagagattaggaagaataaccagtggcgaagcgcacgatctggataccaactgacgctgagg  
acgaaagcgtggggagcaaacaggattagataccctgtagtccacgctgtaaacgatgagtgtagatgtcgggtgtcaaagctc  
ggtatcgcgtaaacacattaagcactccgcctggggagtagctacgca

>GM2GI8201E4NFQ

gccacggctaactacgtgccagcagccgcgtaatacgtaggtggcaagcgtgtccggaatcattggcgtaaagggtacgtagg  
cggctaattaagttaggagtgaaaagccatagctcaactatagtaagctttaaaactgattagcttgagtaattgaaggtaagtggaa  
ttcctagtagcggtaaatgcgtagatattaggaagaataaccagtggcgaagcgcacttactggcaattaactgacgctgaggtac  
gaaagcgtggtagcaaacaggattagataccctgtagtccacgctgtaaacgatgagtgttaggtgtctgggagaacctgggtgc  
cacagcaaacgcaataaacactccgcctggggagtagcacgca

>GM2GI8201EG0KW

gccccggctaactacgtgccagcagccgcgtaatacgtagggggcgagcgttatccggaattattggcgtaaagagtgctaggt  
ggctgtgcaagcgcagtggttaagataacggcttaaccgtgtatgccggcgaaactggacagcttgagtacaggagaggaaagcg  
gaattcctagtagcggtaaatgcgtagagattaggaagaacaccggtggcgaaggcggctttctggtggcaactgacgttgag  
gcgcaagatgggtagcgaacaggattagataccctgtagtccataccgtaaacgatgaatactagggttaggaggtatcgact  
ccttctgtccgaaacgaacgattaagtattccacctggggagtagctacgca

>GM2GI8201AXNPK

gccccggctaactacgtgccagcagccgcgtaatacgtagggggcgagcgtgtccggaattattggcgtaaagggtacgtagg  
cggactgaaagttgacgtgaaagcccggggcttaaccccggcgagcgttaaaaactacaggccttgagtggtagaagggtacgt  
ggaattcctagtagcggtaaatgcgtagagattaggaagaataaccagtggcgaagcgcacgatctggataccaactgacgctg



aggtagcgaagcgtggggagcaaacaggattagataccctggtagtccacgccgtaaacgatgagtgtagatgtccgaggtaaac  
ttgggtgctcgaagccaacgcgataaacactccgcctggggagtagcacgca

>GM2GI8201BNF2M

ggtccggctaattacgtgccagcagccgcggaatacgttaaggaccgagcgttgccggaatcattgggcgtaaagagtagtaggc  
ggtatgataagtaggagtaaaaggcaccggctcaaccggcgttaagctttaaaactgtcacttgagacattgaggggaaagtgg  
aatttctagtagcgggtgaaatgctcagatattaggaagaataaccagaggcgaaagcgacttctagcgtatctgacgctgaggt  
acgaaagcgtgggaagcaaacaggatcagataccctggtagtccacgcgtgtaaacgatgagtgcaagggtgggggtcaaact  
cgggtcccgctaacacagtaagcactccgcctggggagtagctacgca

>GM2GI8201AORZA

ggtaccggctaattacgtgccagcagccgcggaatacgttaaggaccgagcgttgccggaatcattgggcgtaaagagtagtag  
gcggtagaataagtagaagtaaaaggcaccggctcaaccggcgttaagctttaaaactgtttacttgagacattgaggggaaagtg  
gaatttctagtagcgggtgaaatgctcagatattaggaagaataaccagaggcgaaagcgacttctagcgtatctgacgctgag  
gtacgaaagcgtgggaagcaaacaggattagataccctggtagtccacgccgtaaacgatgagtgcttagatgtcgggtgtaaacg  
tcggtatcgcgctaacacattaagcactccgcctggggagtagctacgca

>GM2GI8201EWF4F

gccacggctaactacgtgccagcagccgcggaatacgttaggtggcgagcgttatccggattactgggtgtaaagggcgtgtagc  
ggatgggtaagttggctgttaacctgggggtaaacccccagcctgcaaccgaaactgctgatcttgagtaccagaggggaaagcg  
gaattcctagtaggagcggtaaaatgcatagagattaggaagaacaccggtggcgaaggcggccttctggctgcaactgacgttag  
gctcgaagatgggtagcgaacaggattagataccctggtagtccacgccgtaaacgatgagtgtagatgtccgaggtaaacctg  
ggtgctcgaagccaacgcgataaacactccgcctggggagtagcacgca

>GM2GI8201DIJFD

gccacggctaactacgtgccagcagccgcggaatacgttaggtggcgagcgttatccggattactgggtgtaaagggcgtgtaggc  
ggtcttcaagtcggaagtgaaaattcatggctcaactgtgaactgcttacgaaactggaggacttgagtactagaggggaaagcg  
gaattcctagtagcggtaaaatgcttagagattaggaagaacaccggtggcgaaggcggccttctggctgcaactgacgttag  
gctcgaagatgggtagcgaacaggattagataccctggtagtccataccgtaaacgatgaatactaggttaggaggtatcgact  
ccttctgtgccgaaacgaacgattaagtattccacctggggagtagctacgca

>GM2GI8201BEP11

gccacggctaactacgtgccagcagccgcggaatacgttagggggcgagcgttgccggaattattgggcgtaaagggtagtagc  
cggcttctaagttgacgtgaaatccggggctaactccggcaagcgttgaaaactgggagcttgagtatggaaggacagtgg  
aattcctggtgtaggtgaaatgctcagagatcaggaagaataaccggtggcgaaggcggccttctggctagcaactgacgctgag  
gctcgaagcgtggggagcaaacaggattagataccctggtagtccacgcagtaaacgatgaatactgtagtaggaggtatcgac  
cccttctgtcgaagttaacgtattaagtattccacctggggagtagcacgca

>GM2GI8201APMI6

ggtccggctaattacgtgccagcagccgcggaatacgttaaggaccgagcgttgccggaatcattgggcgtaaagggtagtaggc  
ggctaattaagtaggagtgaaaagccatagctcaactatagtaagctttaaaactgattagcttgagtaattgaagggttaagtgaat  
tcttagtagcggtaaaatgcttagagattaggaagaacaccggtggcgaaggcggccttctggctagcaactgacgctgagggc

cgaaagcgtggggagcaaacaggattagataccctggtagtcacgcagtaaacgatgaatacttgatgtaggaggtatcgacccc  
ttctgtgtcgaagttaacgtattaagtattccacctggggagtagcaccgca

>GM2GI8201C500Q

gccccggctaactacgtgccagcagccgcgtaatacgtagggggcgagcgttatccggaattattgggcgtaaagagtgcgtaggt  
ggctgtgcaagcgcagtttaagataacggcttaaccgttgcgagcgaactggacagcttgagtagcaggagaggaaagcg  
gaattcctagtgtagcggtgaaatgcgtagatattaggaagaacaccagaggcgaaggcggcttctggactgcaactgacactgag  
gcacgaaagcgtggggagcaaacaggattagataccctggtagtcacgcgtaaacgatgattactcgaagtatgcgatatgaca  
gtatgctccaagcgaagtgataagtaatccacctgggaagtagcaccgca

>GM2GI8201AXQX0

gccccggctaactacgtgccagcagccgcgtaatacgtagggggcgagcgtgtccggaattattgggcgtaaagggtagctagg  
cggcttttaagttgacgtgaaagccccgggcttaactccggcaagcgttgaaaactggaaggcttgagtgatggaagggacagtg  
aattcctggtgtagtggtgaaatgcgcagagatcaggaagaataaccagtggcgaaggcactgtctggacattaactgacgctgag  
tacgaaagcgtggggagcaaacaggatcagataccctggtagtcacgcgtaaacgatgagtctagacgtcgggtgtcaaagc  
ccggtgtcggcgaataaccagtaagcactccgcctggggagtagcagca

>GM2GI8201DAEB5

gccccggctaactacgtgccagcagccgcgtaatacgtagggggcaagcgtgtccggaattattgggcgtaaagggtagctagg  
cggcttgacacgtttagcgttaaagtggggctcaactcccatttgcgttaaaacgggtgaagcttgagtgtagaggggatcgtgga  
attcctggtgtagcggtgaaatgcgtagagatcaggaagaataaccagtggcgaagcgcgcttgataccaactgacgctgag  
tacgaaagcgtggggagcaaacaggattagataccctggtagtcacgcagtaaacgatgaatacttgatgtaggaggtatcgacc  
ccttctgtgtcgaagttaacgtattaagtattccacctggggagtagcaccgca

>GM2GI8201DQEB3

gccccggctaactacgtgccagcagccgcgtaatacgtagggggcgagcgtgtccggaatgattggggtgtaaagggtagctagg  
gcggttttaagttgaacgtgaaagccccgggcttaactccggcaagcgttgaaaactggaaggcttgagtgatggaagggacagt  
ggaatttctagtgtagcggtgaaatgcgcagatattaggaagaataaccagaggcgaagcgcacttctagcagatgatctgacgctga  
ggtacgaaagcgtgggaagcaaacaggattagataccctggtagtcacgcagtaaacgatgaatacttgatgtaggaggtatcg  
ccccttctgtgtcgaagttaacgtattaagtattccacctggggagtagcaccgca

>GM2GI8201DUD95

ggtccggctaattacgtgccagcagccgcgtaatacgtaggggaccgagcgtgtccggaatcattgggcgtaaagagtacgtaggc  
ggtatgataagtaggagtaaaaggcaccggctcaaccggcgaagcgtttaaactgtcacttgagacattgaggggaaagtgg  
aatttctagtgtagcggtgaaatgcgcagatattaggaagaataaccagaggcgaagcgcacttctagcagatgatctgacgctgaggt  
acgaaagcgtgggaagcaaacaggattagataccctggtagtcacgcgtaaacgatgagtctagatgtcgggtgtcaaagctc  
ggtatcggcgttaacacattaagcactccgcctggggagtagcagca

>GM2GI8201EDLQ2

gcaccggctaactacgtgccagcagccgcgtaatacgtaggggtgcgagcgtgtccgatttattgggcgtaaagggctcgtaggc  
ggtcgattgcgtcgggaagtggaaacctgcggttaaccgtggcgcttccgatacgggtgacttgaggaaggtaggggagaatg  
gaattcctggtggagcgggtgaaatgcgcagatattcaggaggaacaccagtggcgaaggcgggttctctggaccttctgacgctgag

gagcgaaagcgtggggagcaaacaggattagataccctgtagtccacgccgtaaacgatgagtgtagatgtccgaggtaaact  
gggtgctggaagccaacgcgataaacactccgcctggggagtagcacgca

>GM2GI8201C6OQV

gtcgctaatacgtgccagcagccgcggaataacgtaaggaccgagcgtgtccggaatcattgggcgtaaagggtagtagggcgt  
aattaagttaggagtgaaaagccatagctcaactatagtaagcttttaaaactgattagcttgagtaattgaagggtaagtggaattcct  
agtgtagcgggtgaaatgctgcagatattaggaagaataaccagtggcgaagcgcacttactggcaattaactgacgctgaggtacgaa  
agcgtggtagcaaacaggattagataccctgtagtccacgcgtgtaaacgatgagtgtaggtgtctgggagaacctgggtgccac  
agcaaacgcaataaacactccgcctggggagtagcacgca

>GM2GI8201DM296

gggccgctaatacgtgccagcagccgcggaataacgtagggcgagcgtgtccggaattattgggcgtaaagggtagtagggcgt  
gcttttaagttgacgtgaaagcccggggcttaactccggcaagcgttgaaaactggagggcttgagtgatggaagggacagtgga  
attcctggtgtagtggtgaaatgctgcagagatcaggaagaataaccagtggcgaagggcactgtctggacattaactgacgctgaggt  
acgaaagcgtggggagcaaacaggatcagataccctgtagtccacgcgtgtaaacgatgagtgcaaggtgtgggggtcaaact  
cgggtcccgcgtaaacacagtaagcactccgcctggggagtagcacgca

>GM2GI8201ATWBA

gccccggctaactacgtgccagcagccgcggaataacgtaaggaccgagcgtgtccggaatcattgggcgtaaagagtagcgtag  
gcggtaaaataagttagaagtaaaaggcaccggctcaaccggtgtaagcttttaaaactgtttacttgagacattgaggggaaagtg  
aattctagtgtagcgggtgaaatgctgcagatattaggaagaataaccggtggcgaagggcacttctagcgtggttctgacgctgaggt  
cgaaagcgtgggaagcaaacaggattagataccctgtagtccacgccgtaaacgatgagtgtagatgtccgaggtaaactgggt  
gtcccaagcaaacgcgataaacactccgcctggggagtagcacgca

>GM2GI8201BYWG1

gggccgctaatacgtgccagcagccgcggaataacgtaaggaccgagcgttatccggatttactgggtgtaaagggcgtgtaggc  
ggtcttcaagtcggaagtgaaaattcatggctcaactgtgaactgcttacgaaactggaggacttgagtactagaggggaaggcgg  
aattcctagtgtagcgggtgaaatgctgtagagattaggaagaacaccggtggcgaagggcgccttctggctagcaactgacgctgag  
gctgcgaaagcgtggggagcaaacaggattagataccctgtagtccacgcagtaaacgatgaatacttgatgtaggaggtatcgac  
cccttctgtgcaagftaacgtattaagtattccacctggggagtagcacgca

>GM2GI8201C90UY

gtatcggctaactccgtgccagcagccgcggaataacggaggatacgagcgttatccggatttattgggttaaaagggtagcagggc  
gtctgtcaagtcaggggtgaaaagccgaggctcaacctggcttgccttgaaactgaggactggagagtacatgatgtggcg  
aatgcgtagtgtagcgggtgaaatgcatagatattacgcgaaactccgattgcgaaggcagctcacaaggtatgtctgacgctgag  
cacgaaagcgtggggagcaaacaggattagataccctgtagtccacgccgtaaacgatgaatactaggtgtagggggatcgac  
ccccctgtgccgctaacacaataagtattccgcctgggaattacgatcgca

>GM2GI8201ASEWO

gcaccggctaactacgtgccagcagccgcggaataacgtaggggtgagcgtgtccgatttattgggcgtaaagggctcgtaggc  
ggctgattgctggaagtgaaacctgaggcttaaccgtggcgcttccgatacgggtgactgaggaaggtaggggagaatg  
gaattcctggtgtagtggtgaaatgctgcagagatcaggaagaataaccagtggcgaagggcactgtctggacattaactgacgctgag

gtacgaaagcgtggggagcaaacaggatcagataccctgtagtccacgctgtaaacgatgagtgaagggtgtgggggtcaaac  
ctcggtgccgccgtaacacagtaagcactccgcctggggagtacgtacgca

>GM2GI8201BH90Q

gccacggctaactacgtgccagcagccgcggaatacgtagggtggcgagcgttatccggattactgggtgtaaagggcgttaggc  
ggtctttaagtcggaagtgaaaattcatggctcaactgtgaactgcttacgaaaactggaggactgagtaccagaggggaaggcgg  
aattcctggtgtagcggtaaaatgcgtagagatcaggaagaataaccagtggcgaaggcactgtctggacattaactgacgctgagg  
tacgaaagcgtggggagcaaacaggatcagataccctgtagtccacgctgtaaacgatgagtgaagggtgtgggggtcaaacctc  
ggtgccgccgtaacacagtaagcactccgcctggggagtacgtacgca

>GM2GI8201BFYZP

ggaccggctaatacctgcccagcagccgcggaatacgggaagggtccggcggttatccggattattgggttaaaaggagcgtaggcc  
gtggattaagtgtgttgaaatgtggacgctcaacgtctgagttgcagcgcatactggtcactgagtccgtgcagcgtggcggaact  
cgctgtagcgggtgaaatgcttagatgacgaagaactccgatcgcgaaggcagccaacgggatcgtcactgacgcttaagctcg  
agagtgcgggtatcgaaaggattagataccctgtagtccgcacggtaaacgatggatgctcgtatcggcgcttggcgctggtggc  
aacgcgaaagcttaagcatcccacctggggagtacgccgca

>GM2GI8201DMSVT

ggtccggctaatacctgcccagcagccgcggaatacgtaggaccgagcgttgcgggaatcattgggcgtaaagagtacgtaggc  
ggtatgataagtaggagtaaaaggcaccggctcaaccggcgtaagctttaaaactgtcatactgagacattgaggggaaagtgg  
aatttctagttagcgggtgaaatgctgagatattaggaagaataaccagaggcgaaagcgactttctagcgtatgacgctgaggt  
acgaaagcgtgggaagcaaacaggattagataccctgtagtccacgcccgtaaacgggtggcgctaggtgtgggttctcctccacgg  
gatccgtgccgtagctaacgcattaagcgccccgcctggggagtacgccgca

>GM2GI8201DMU7W

gccccggctaactacgtgccagcagccgcggaatacgtaggggcgagcgttatccggaattattgggcgtaaagagtatgtaggt  
ggtttctaagcgcagggtttaaggcaatggctcaaccattgtccctgcgaactgagtaactgagtgcaggaggggaaagcggga  
attcctagttagcgggtgaaatgcgtagatattaggaggaacaccagtggcgaaggcggcttctggactgtaactgacactgagata  
cgaaagcgtggggagcaaacaggattagataccctgtagtccacgcccgtaaacgatgagcactaggtgtcgggggtcgaagact  
tcggtgccgagtaacgcattaagtctccgcctggggagtacgcacgca

>GM2GI8201EOO6X

gctccgtaatacctgcccagcagccgcggaatacgtatggagcagcgttgcgggaattattgggcgtaaaggtacgcagggc  
gtttaaagtgaatgttaaagatcggggctcaaccccgtaaagcattggaaactgataaactgagttagtgagaggaaagtga  
attcctagttagtgggtgaaatcgttagatattaggaggaataaccagttagcgaaggcactttctggacacaaactgacgctgagga  
cgaaagcgtggggagcaaacaggattagataccctgtagtccacgcccgtaaacgatgaatgctaggtgtgggtgtcaaagctcg  
gtgccgaagtaacacattaagcattccgcctggggagtacgcacgca

>GM2GI8201BSAPO

gcaccggctactacgtgccagcagccgcggaatacgtagggtgcgagcgttgcgggaatcattgggcgtaaagagtacgtaggc  
ggtatgataagtaggagtaaaaggcaccggctcaaccggcgtaagctttaaaactgtcatactgagacattgaggggaaagtgg  
aatttctagttagcgggtgaaatgctgagatattaggaagaataaccagaggcgaaagcgactttctagcgtatgacgctgaggt

acgaaagcgtgggtagcaaacaggattagataccctggtagtccacgctgtaaacgatgagtgttaggtgctgggagaacctgggt  
gccacagcaaacgcaataaacactccgcctggggagtagcacgca

>GM2GI8201DIBI4

gctccggctactccgtgccagcagccgcggtataacggggggagcaagcgtgttcggattactgggcgtaaagggcgcgaggc  
ggccaccgcaagtcgactgtgaaatctccgggcttaactcgaaaaggtcagccgatactgcggggctagagtgcagaaggggcaa  
ctggaattctcgggtgtagcgggtgaaatgctgtagatcgcgaggaacacctgcggcgaaggcgggtgctgggctgacactgacgct  
gagtgtgcgaaagctaggggagcgaacgggattagatccccggtagtctagccttaaacgatgaatgcttgggtgctggggtttat  
agtccccgggtgccgtcgcctaacgcttaagcattccgcctggggagtagcggtcgca

>GM2GI8201EA6L4

ggtccggctaattacgtgccagcagccgcggtataacgtaaggaccgagcgttgcggaatcattgggcgtaaagggtagctaggc  
ggctaattaagtaggagtgaaaagccatagctcaactatagtaagcttttaaaactgattagcttgagtgcagaaggggacagtgga  
ttcctggtgtagtggtgaaatgctgcagagatcaggaagaataaccagtggcgaaggcgactgtctggacattaactgacgctgagga  
cgaaagcgtggggagcaaacaggatcagataccctggtagtccacgctgtaaacgatgagtgcgaaggtgtgggggtcaaacctc  
ggtgccgccgtaaacacagtaagcactccgcctggggagtagctacgca

>GM2GI8201C4PMJ

gccacggctaactacgtgccagcagccgcggtataacgtaggtggcaagcgttatccggaattattgggcgtaaagggtagcagc  
cgggtggtaagtttaaggtgaaagcgtggggctcaacccatatagccttagaaactggtcaactagagtgcagaagagggtagt  
gaattcatgtgtagcggtaaaatgctgtagatatagaaggaacaccagtggcgaaggcggctacctggtctgtaactgacgctcat  
cacgaaagcgtggggagcaaataaggattagataccctagtagtccacgctgtaaacgatgaataactaagtgtggggaaactcag  
gctgcagtaaacgcaataagtattccgcctggggagtagcagca

>GM2GI8201CHTF8

ggtccggctaattacgtgccagcagccgcggtataacgtaaggaccgagcgttgcggaatcattgggcgtaaagagtagctaggc  
ggtaaaataagtagaagtaaaaggcaccggctcaaccggtgtaagcttttaaaactgtttacttgagacattgaggggaaagtgga  
atttctagtagcgggtgaaatgctgcagatattaggaagaataaccggtggcgaagcgactttctagcagatgttctgacgctgaggtac  
gaaagcgtgggaagcaaacaggattagataccctggtagtccacgctgtaaacgatgagtgcgaaggtgtgggggtcaaacctcgg  
tgccgccgtaaacacagtaagcactccgcctggggagtagcagca

>GM2GI8201C4U99

gacacccggctaactacgtgccagcagccgcggtataacgtaggggtgcaagcgttatccggatttactgggtgtaaagggcgagtag  
acgggagattaagtcagatgtgaaaacttagggctcaaccttaagactgcatctgaaactggttcttgagtctggagaggtgaaagc  
gaattcctagtagcgggtgaaatgtgtagatattaggaagaacaccagtggcgaaggcggcttactggacagtaactgacgttag  
gagcgaaggtgtggggagcaaacaggattagataccctggtagtccacactgtaaacgatggatactaggtgttggcaagcgattg  
cagtccggcgctaacgcaataagtatccacactggggagtagcagcga

>GM2GI8201EEE61

gcaccggccaactacgtgccagcagccgcggtataacgtaggggtgcaagcgttgcggaattattgggcgtaaagagctcgtaggc  
ggtctgtcgcgtcggctgtgaaaacccgaggctcaacctcgggcctgcagtcgatacgggcaaactagagtactgcaggggagact  
ggaattcctggtgtagcgggtgaaatgctgcagatatacaggaggaacaccggtggcgaaggcgggtctctgggcagtaactgacgctg

aggagcgaaagcgtggggagcgaacaggattagataccctgtagtccacgccgtaaacgtggggcgctagatgtggggctcattc  
cacgagttccgtgtcgcagctaacgcattaagcgcctggggagtagcggccgca

>GM2GI8201DXPGR

gcccggctaactacgtgccagcagccgcgtaatacgtagggggcgagcgttgcggaattattgggcgtaaagggtacgtaggc  
ggcttttaagttgacgtgaaagacccgggcttaactccggcgagcgttgaaaactggaggccttgagtgatggaaggacagtg  
gaattcctggtgtagtggtgaaatgcgagagatcaggaagaataaccagtggcgaaggcgactgtctggacattaactgacgtgag  
gtacgaaagcgtggggagcaaacaggatcagataccctgtagtccacgctgtaaacgatgagtgaagggtgggggtcaaac  
ctcgtgcccggtaacacagtaagcactccgcctggggagtagcgtacgca

>GM2GI8201DPR3F

gcaccggctaactacgtgccagcagccgcgtaatacgtaggggtcaagcgtaatcggaattactgggcgtaaagcgtgcbagg  
cggttttgtaagtctgtcgtgaaatccccgggctcaacctgggaattgcgatggagactgcaaggctagaatctggcagaggggggta  
gaattccacgtgtagcagtgaaatgcbtagagatgtggaggaacaccgatggcgaaggcagccccctgggtcaagattgacgctc  
atgcacgaaagcgtggggagcaaacaggattagataccctgtagtccacgccctaaacgatgtctactagttgtcgggttttaattaa  
cttgtaacgcagctaacgcgtgaagtagaccgcctggggagtagcgtcgcga

>GM2GI8201A5G3W

gcaccggccaactacgtgccagcagccgcgtaagacgtaggggtgcbtagcgttgcggaattattgggcgtaaagagctcgtagg  
cggctcgtcgcgtcaccgtgaaaaccacagcttaactgtgggcttgcggtgatacgggcgggctagagttcggtaggggagact  
ggaattcctggtgtagcgtgaaatgcbtagatatacaggaggaacaccggtggcgaaggcgggtctctgggccgatactgacgctg  
aggagcgaaagcgtggggagcgaacaggattagataccctgtagtccacgctgtaaacgtgggcgctaggtgtggggggcctct  
ccggttctctgtccgcagctaacgcattaagcgcctggggagtagcggccgca

>GM2GI8201DHF5J

gccccggctaactatgtgccagcagccgcgtaaaaacatagggggcaagcgttgcggaatcactgggcgtaaagggtgcbtagg  
gcbgtctgtaagtcggatgtgaaatgtaagggtcaaccctaactgcatctgatactggcagacttgagtgcggaagaggcaagt  
ggaattcctagtgtagcgtgaaatgcbtagatattaggaggaacaccagtggcgaaggcgactgtctggccgtaactgacgctga  
ggcgcgaaagcgtggggagcaaacaggattagataccctgtagtccacgccgtaaacgatgagtactaggtgtgggggttcgat  
acctcgggtccgcagtaacacaataagtactccgcctggggagtagcgtcgcga

>GM2GI8201BF97J

gccccggctaactacgtgccagcagccgcgtaatacgtaggggctagcgttatccggattactgggcgtaaagggtgcbtagg  
gtcttcaagtcaggagttaaaggctacggctcaaccgtagtaagctcctgatactgtctgacttgagtgcaggagaggaaagcggaa  
ttcccagtgtagcgtgaaatgcbtagatattgggaggaacaccagttagcgaaggcggcttctggactgtaactgacgctgaggca  
cgaagcgtggggagcaaacaggattagataccctgtagtccacgctgtaaacgatgagtactaggtgtcggaggttacccttc  
ggtgccgcagctaacgcattaagtagtactccgcctggggagtagcgcacgca

>GM2GI8201CIPXC

gtaccggctaactacgtgccagcagccgcgtaatacgtaggggtactagcgttgcggaattattgggcgtaaagggtgcbtagg  
ttgtcgcgtctgtcgtgaaatcctgtgcttaaccatgggcttgcggtggtacgggcaggcttgagtgcggtaggggagactggaattc  
ctggtgtagcgtggaatgcbtagatatacaggaggaacaccggtggcgaaggcgggtctctggccgtaactgacactgaggagc

gaaagcgtggggagcgaacaggattagataccctggtagtcctatgctgtaaactgtgggcactagggtgtggggatcgttgtggttctg  
cgccgtagctaaccgattaagtgtcccgcctggggagtagcggtcgca

>GM2GI8201E2HFL

gcacggctaaatacgtgccagcagccgcggtaatacgtatggtgcaagcgttatccggattactgggtgtaaagggagcgtagacg  
gatgggcaagtctgatgtgaaaacccgggctcaacccgggactgcattggaaactgtcatctagagtgctggagaggttaagtg  
aatcctagtgtagcggtgaaatgcgtagatattaggaggaacaccagtgggcgaaggcggcttactggacagtaactgacgttgagg  
ctcgaagcgtggggagcaaacaggattagataccctggtagtcacgcgctaaacgatgactactagggtgtcgggtagcaaagct  
attcgggtccgcagctaacgcaataagtagtccacctggggagtagcgttcgca

>GM2GI8201B07JT

ggtccggctaatacgtgccagcagccgcggtaatacgtatggtgcaagcgttatccggaatcattgggcgtaaagggtagctaggc  
ggctaattaagtaggagtgaaaaggccatagctcaactatagtaagctttaaaactgattagcttgagtaattgaagggtaagtggat  
tcttagtgtagcggtgaaatgcgcagatattaggaagaataaccagtgggcgaagcgcacttactggcaattaactgacgctgaggtac  
gaaagcgtggggagcaaacaggatcagataccctggtagtcacgcgctgtaaacgatgagtgcagggtgtgggtgtcaaaactgag  
tgccgccgttaacacagtaagcactccgcctggggagtagcgttcgca

>GM2GI8201C4UXV

gccacggctaactacgtgccagcagccgcggtaatacgtatggtggcaagcgttatccggaattattgggcgtaaagcgcgcgtagg  
cgttcttaagtctgatgtgaaagccccggctcaaccggggagggcattggaaactgggaaactgagtgcagaagaggagagt  
ggaattccatgtgtagcggtgaaatgcgcagagatattgaggaacaccagtgggcgaagggcgtctctggtctgtaactgacgctga  
ggtgcgaaagcgtggggatcaaacaggattagataccctggtagtcacgcgctgtaaacgatgagtgcagggtgtgggggttccg  
cccctcagtgctgcagctaacgcaataagcactccgcctggggagtagcgttcgca

>GM2GI8201DDIGV

gccacggctaactacgtgccagcagccgcggtaatacgtatggtggcaagcgttggcgaataactgggcgtaaaggatgctgtagg  
cgttagataagtaatgtgtcaaatatataggctaacctgtagaaggcatataaaactgtgtaactagagtgcaggagaggttaagt  
gaattcctagtgtagcggtgaaatgcgtagagattaggaagaacaccagtgggcgaagggcacttactggactgtaactgacgctgag  
gcatgagagcatggggagcaaacaggattagataccctggtagtcacgcgctgtaaacgatgggtactagggtgtgggctgtaagaa  
cagttcgtccgtgcgcaaacgcaataagtaacccgcctgaggagtagcgttcgca

>GM2GI8201BSM3X

gcgacggctaaatacgtgccagcagccgcggtaatacgtatgtcgcaagcgttatccggattattgggcgtaaagcgcgcttagggc  
gtctggttaagtctgatgtgaaatgcggggctcaactccgtattgcgttgaaactgccagactagagtattggagaggtggcgga  
ctacaagttagaggtgaaatcgtagatattgttaggaatgccgatagagaagtcagctcactggacagatactgacgctgaagcgc  
gaaagcatggggagcaaacaggattagataccctggtagtcacgcgctgtaaacgatgattactaagcgtcgggggtcgaacctcgg  
cactcaagctaaccgcgataagtaatccgcctggggagtagcgttcgca

>GM2GI8201CM7TV

ggtccggctaatacgtgccagcagccgcggtaatacgtatggtgcaagcgttatccggaatcattgggcgtaaagggtagctaggc  
ggctaattaagtaggagtgaaaaagccatagctcaactatagtaagctttaaaactgattagcttgagtaattgaagggtaagtgga  
attcctagtgtagcggtgaaatgcgcagatattaggaagaataaccagtgggcgaagcgcacttactggcaattaactgacgctgaggtg

cgaaagcgtggtagcaaacaggattagataccctggtagtcacgcccgtaaacgatgggtactaggtgtagggggatcaactcc  
ccctgtgccgtcgtaacgcagtaagtaccccgctggggagtacggtcgca

>GM2GI8201CDM3Y

gccccggctaactctgtgccagcagccgcgtaatacagagggggcgagcgttgcggaattactgggcgtaaagggcgctagg  
cggcctgctaagtcggacgtgaaatccctcggtcaaccggggaacggcgctccgatactgggtggctgaaatccgggagagggatg  
cgaattccaggttagcggtaaatgctgtagatctggaggaacaccgggtggcgaaggcggcatcctggaccggattgacgct  
gatgcgcgaaagccaggggagcaaacgggattagatacccggtagtcctggccctaaacgatgagtcttgggtggcgggtatc  
gatccctgccgtgccgaagctaacgcattaagcactccgctggggagtacggtcgca

>GM2GI8201BCPGY

gccccggctaactacgtgccagcagccgcgtaatacgtagggcgagcgttgcggaattattgggcgtaaagggtagctaggc  
ggcttctaagttgacgtgaaatccggggctaactccggcaagcgttgaactggggagcttgagtgatggaagggacagtgga  
attcctggtgtagtggtgaaatgctgagagatcaggaagaataccgggtggcgaaggcactgtctggacattaactgacgtgaggt  
acgaaagcgtggggagcaaacaggatcagataccctggtagtcacgctgtaaacgatgagtgcagggttgggtgtcaaaactc  
agtgccgccgtaaacacagtaagcactccgctggggagtacgtacgca

>GM2GI8201CS03K

gcaccggctaactacgtgccagcagccgcgtaatacgtaggggtgcaagcgttaacggaattactgggcgtaaagcgtgctcagg  
cgttctgtaagacagatgtgaaatcccggtcaacctgggaattgcattgtgactgcaggactagagttcatcagaggggggtg  
gaattccaagttagcagtgaaatgctgtagatattggaagaacaccaatggcgaaggcagccccctgggatgctgactgacgctca  
tgacgaaagcgtggggagcaaacaggattagataccctggtagtcacgcccctaaacgatgtctactgggttggggattatatac  
ttgtaacgaagctaacgcgtgaagtagaccgctggggagtacggtcgca

>GM2GI8201DA3X4

gtcacggcttactacgtgccagcagccgcgtaatacgtaggtggcaagcgttatccggattattgggcgtaaaggggtgctcaggc  
gtctattaagttgggtgaaagcgtgaagctcaacttcattagcctcaaaaactggtagactagagtgcaagaagggtagtggaat  
tccatgtgtagcggtaaaatgctgtagatataggaggaacaccagtgccgaaggcggctacctggtctgtaactgacgctcaggcac  
gaaagcgtggggagcaaataggattagataccctagtagtcacgcccctaaacgatgagaactaagtgtggagtaattcagtgctg  
cagtaacgcaataagttctccgctgaggagtatgcacgca

>GM2GI8201ANGOF

gcaccggctaactacgtgccagcagccgcgtaatacgtaggggtgagcgttgcggaattactgggcgtaaagagctcgtagg  
ggttgtcgcgtcgtctgtgaaatccggggctaactccgggctgagggcagatacgggcataactgagtactgtaggggagactgg  
aattcctggtgtagcggtaaatgctgagatatacaggaggaacaccgggtggcgaaggcgggtctctgggcagtaactgacgctgag  
gagcgaagcatggtagcgaacaggattagataccctggtagtcacgcccctaaacgatgaacttgatgtaggaggtatcgcac  
cccttctgtgcaagttaacgtattaagtattccacctggggagtacgaccgca

>GM2GI8201CMZRX

gcaccggctaactacgtgccagcagccgcgtaatacgtaggggtgcaagcgttgcggaattactgggcgtaaagagctcgtagg  
ggttgtcgcgtcgttagtgaaagcccggggctaactccgggtctgctggcgatacgggcataactgagtctgtaggggagactgg  
aattcctggtgtagcggtggaatgctgagatatacaggaggaacaccgatggcgaaggcaggtctctgggcagtaactgacgctgag



gagcgaaagcatgggtagcgaacaggattagataccctggtagtcctatgccgtaaacgggtggcgctaggtgtgggggttttcacg  
acttccgtgccgtagctaacgcattaagcgccccgcctggggagtagcggccgca

>GM2GI8201CB0KG

ggaccggctaattccgtgccagcagccgcggaatacgggaaggtccgggcttaccggattattgggttaaaaggagcgcaggc  
ggacttttaagtcagttgtgaaatacggcggctcaaccgtcggactgcagttgatactggaggcttgagtgcacacagggatactgga  
attcatggtgtagcgggtgaaatgctcagatatcatgaagaactccgatcgcgaaggcaggtatccgggggtgctactgacgctgaggct  
cgaaagtgcgggtatcaaacaggattagataccctggtagtcacgacagtaaactgaatactcggggtggcgatacacagtca  
gccgcccagcgaagcgtaagtattccacctggggagtagcggccgca

>GM2GI8201D1AEY

gccacggctaactacgtgccagcagccgcggaatacgtaggtggcaagcgttgcggattattgggcgtaaaggagcgcagg  
cggtagcttaagtctgatgtgaaagcccacggctcaaccgtggagggtcattggaaactgggtcacttgagtgtagaaggaaagt  
ggaattccatgtgtagcgggtgaaatgcttagatataatggaggaacaccagtggcgaaggcgactttctggtctacaactgacgctgag  
gctcgaaagcgtggggagcaaacaggattagataccctggtagtcacgcccgtaaactgatgagtgctaagtgtggagggttccac  
ccttcagtctggagtaacgcaataagcactccgcctggggagtagcggctcgca

>GM2GI8201CACRH

ggatcggctaactccgcgccagcagccgcggaatacggaggatccaagcgttaccggattattgggttaaaagggtgcgtagggc  
gtctattaagtcagtggtgaaagttgcagctcaactgtaaaattgccattgaaactggtagacttgatgtagaggaagcggaaat  
gcggtgtgtagcgggtgaaatgcttagatataacgcagaaccccaattgcaaggcagcttgctggaccattactgacgctgaggcagc  
aaagcgtgggatcaaacaggattagataccctggtagtcacgcccgtaaactatgaatgtagctattggcgatatacagtcagtg  
cacagagaaatcgtaagcattccacctggggagtagcggccgca

>GM2GI8201CK2O7

ggtccggctaattacgtgccagcagccgcggaatacgtaggggtgcgagcgttgcgggaattactgggcgtaaagagctcgtaggt  
ggttgtcgcgctggttgtaagtcacggcttaactgtgggactgcaggcgatacgggcataacttgagtgtgtaggggagactgga  
attcctggtgtagcgggtgaaatgctcagatatcaggaggaacaccgatggcgaaggcaggtctctgggcagtaactgacgctgagg  
agcgaagcagcgtggtagcgaacaggattagataccctggtagtcacgctgtaaactgggtggcgctaggtgtgagtccttccacg  
ggttcgtgccgtagctaacgcattaagcggccccgcctggggagtagcggccgca

>GM2GI8201A1FS1

gcacggctaactacgtgccagcagccgcggaatacgtaggggtgcgagcgttgcggattattgggcgtaaagagctcgtagggc  
ggtgatcgcgctggaagtgaaaactggggcttaaccctgggcgtgcttcgatacgggtgacttgaggaaggtaggggagaatgg  
aattcctggtggagcgggtgaaatgctcagatatcaggaggaacaccagtggcgaaggcgggttctctggaccttctgacgctgagg  
agcgaagcagcgtggggagcaaacaggcttagataccctggtagtcacgctgtaaactgggtgggtactaggtgtgggggtccattccac  
ggactccgtgccgtagctaacgcattaagtaccccgctggggagtagcggccgca

>GM2GI8201B8MI1

gccccggctaactacgtgccagcagccgcggaatacgtagggggcgagcgttgcgggaattattgggcgtaaagggtacgtagg  
cggcttctaagttgacgtgaaatccggggcttaaccctggcgaagcgttgaaaactaggagcttgagtatggaaggacagtg  
aattcctggtgtagtggtgaaatgctcagagatcaggaagaataccggtggcgaaggcagctgtcggacattaactgacgctgagg

tacgaaagcgtggggagcaaacaggattagataccctggtagtcacgcgtgtaaacgatgagtgtaggtgtctgggagaacctggg  
tgccacagcaaacgcaataaacactccgctggggagtagcacgca

>GM2GI8201ELXK3

gccccggctaactacgtgccagcagccgcggaatacgtagggggcgagcgtgtccggaattattgggcgtaaagggtagctagg  
cggcttttaagttgacgtgaaagccccgggcttaactccggcaagcgtgaaaactggaaggcttgagtgatggaagggacagctgg  
aattcctggtgtagtggtgaaatgcgagagatcaggaagaataaccagtggcgaaggcgactgtctggacattaactgacgctgagg  
tacgaaagcgtggggagcaaacaggattagataccctggtagtcacgcgtgtaaacgatggatactagggtgtaggggtatcgacc  
ccttctgtgccggagtaacacaataagatcccacctggggagtagctacgca

>GM2GI8201D2HAV

ggtccggctaatacgtgccagcagccgcggaatacgtaggaccgagcgtgtccggaatcattgggcgtaaagggtagctaggc  
ggctaattaagtaggagtgaaaagccatagctcaactatagtaagcttttaaaactgattagcttgagtaattgaagggtaagtggat  
tcttagttagcgggtgaaatgcgagatattaggaagaataaccagtggcgaagcgactactggcaattaactgacgctgaggtagc  
gaaagcgtgggtagcaaacaggattagataccctggtagtcacgcgtgtaaacgatgagtgtaggtgtctgggatagactgggtgcc  
atagctaacgcaataaacactccgctggggagtagcacgca

>GM2GI8201DXADH

gccccggctaactacgtgccagcagccgcggaatacgtaggggcaagcgtgtccggattactgggcgtaaagcgctgtagg  
cggccacgcaggtccgtgtgaaaactggaggctcaactccagacgtcgacggaaccgtgtggctagagtcgggaagaggaga  
gtggaattcctggttagcgggtgaaatgcgagatattaggaagaacaccaatggcgaaggcagctctctgggacggtagctgacgc  
tgagacgcgaaagcgtggggagcgaacaggattagataccctggtagtcacgcctgaaacgatgggtgctaggtgtgggaggtgt  
cgactcctccgtgccgtagctaacgcattaagcaccgccctggggagtagcggccgca

>GM2GI8201DRJ4H

ggatcggctaactccgtgccagcagccgcggaatacgtaggagatccgagcgttatccggattattgggttaaaagggtagcagggc  
ggagattaagtcggcggtgaaatgtcagctcaactgtaaaagtgccttcgaaactggttccttgagtaggatgaagtaggcggaat  
ttgtggtgtagcgggtgaaatgcatagatattcagaggaactccgattgcgagcagcttactaagccataactgacgctcagggcacg  
aaggcgtgggatcaaacaggattagataccctggtagtcacgcagtaaacgatgattactcgtgttgcgatacaatgtaagcgg  
ctaagcgaagcattaagtaatccacctggggagtagctcgca

>GM2GI8201D8296

gcaccggctaactacgtgccagcagccgcggaatacgtaggaccgagcgtgtccggaatcattgggcgtaaagagtagctagg  
cgtaagataagtagaagtaaagggcaccggctcaaccggcgtaagcttttaaaactgtttacttgagacattgaggggaaagtgg  
aatttctagtagcgggtgaaatgcgagatattaggaagaataaccagtggcgaagcgactactggcaattaactgacgctgagg  
acgaaagcgtggggagcaaacaggatcagataccctggtagtcacgcgtgtaaacgatgagtgcaagggttgggggtcaaacct  
cgggtcccggttaacacagtaagcactccgctggggagtagctacgca

>GM2GI8201DGH1S

gcaccggctaactacgtgccagcagccgcggaatacgtagggtgagcgtgtccggattattgggcgtaaagggctcgtaggc  
ggtcgattgcgtcggaagtggaaacctgcggttaaccgtggcggtgctccgatacgggtgacttgaggaaggtaggggagaatg  
gaattcctggtggagcgggtgaaatgcgagatattcagaggaacaccagtggcgaaggcgggttctctggaccttctgacgctgag

gagcgaaagcgtggggagcaaacaggcttagataccctgtagtccacgctgtaaacgggtgggtactaggtgtggggccattcca  
cggactccgtgccgtagctaacgcattaagtaaccccgctggggagtagcggccgca

>GM2GI8201DT9LR

gccacggctaactacgtgccagcagccgcggaatacgtaggtggcgagcgttatccggattactgggtgtaaagggtacgtaggc  
ggcttttaagttgacgtgaaagcccgggcttaactccggcaagcgtgaaactggaggccttgagtgatggaaggacagtgga  
attcctggtgtagtgggtaaagtcgcagagatcaggaagaataaccagtggcgaaggcactgtctggacattaactgacgctgaggt  
acgaaagcgtggggagcaaacaggatcagataccctgtagtccacgctgtaaacgatgagtgcaagggtgggggtcaaacc  
cggtgcccggttaacacagtaagcactccgcctggggagtagcgtacgca

>GM2GI8201AQ5TD

gcccggctaactacgtgccagcagccgcggaatacgtagggcgcaagcgtgtccggaattattggcgtaaagagctttaggt  
ggctgtcgcgtctccgtgaaaatccagggcttaaccctggacgtgcggtgggtacgggcaggctagagtggttaggggagactg  
gaactcctggttagcgggtaaagtcgcagatattaggaagaacaccgatggcgaaggcaggtctctggccattactgacactga  
gaagcgaagcatggtagcgaacaggattagataccctgtagtccatgccgtaaacgtgggcactaggtgtgggggacattcc  
acgtttccgcgccgtagctaacgcattaagtccccgcctggggagtagcggccgca

>GM2GI8201ARW0E

ggtccggctaattacgtgccagcagccgcggaatacgtaggaccgagcgttgcggaatcattggcgtaaagagtagctaggc  
ggtaagataagttagaagtaaaaggcaccggctcaaccggcgtaagctttaaactgtttacttgagacattgagggggaagtga  
atttctagtagcgggtgaaatgvcagatattaggaagaataaccagagggcgaagcgacttctggacgacaactgacgctgaggg  
gcaagcgtggggagcaaacaggattagataccctgtagtccacggcgaacgatgaatactaggtgtaggggtatcgacc  
cccctgtccggcgctaacacaataagtattccgcctgggaattacgatcgca

>GM2GI8201DSG4T

gcgacggctaatacgtgccagcagccgcggaatacgtatgtcgcaagcgttatccggattattggcgtaaagcgcgcttagggc  
gaaagataagtctgatgtgaaaatgcggggctcaactccgtattgcttgaaactgtcttctagagtactggagaggtggcgga  
ctacaagttagaggtgaaatcgtagatattttaggaatgccgatggagaagtcagctcactggacagatactgacgctgaagcgc  
gaaagcgtggggagcaaacaggattagataccctgtagtccacggcgaacgatgatcactaggtgtgggggtcgaacctcag  
cgccaagctaacgcgataagtgatccgcctggggagtagcacgca

>GM2GI8201A8C8A

ggaccggctatccgtgcagcagccgcggaatacgggaaggtccagcgcttatccggattattgggttaaaggagcgttagggcga  
ccgtaagtcagttgtgaaagttcggggctcaacccggaattgcagttgatactgtcgttctgagtcacacaggggtgctggaatt  
catggttagcgggtgaaatgcttagatcatgaagaactccgatcgcgaaggcatgtgccggagtgcaactgacgctgagggctc  
aaagtgcgggtatcaaacaggattagataccctgtagtccgcacagtaaacgatggatactcgcgggttgcgatacaatgtaagcc  
gccaagcgaagcgttaagtatcccacctggggagtagcggcga

>GM2GI8201ATMFP

ggtccggctaattacgtgccagcagccgcggaatacgtaggaccgagcgttgcggaatcattggcgtaaagagtagctaggc  
ggtaagataagttagaagtaaaaggcaccggctcaaccggcgtaagctttaaactgtttacttgagacattgaggggaaagtga  
atttctagtagcgggtgaaatgvcagatattaggaagaataaccagagggcgaagcgacttctagcgatgatctgacgctgaggtg

cgaaagcgtggggagcaaacaggcttagataccctgtagtccacgctgtaaaccggtgggtactaggtggtgggatccattccacgg  
attctgtgccgtagctaacgcattaagtaccccgctggggagtacggccgca

>GM2GI8201DR2QV

gccacggctaactacgtgccagcagccgcggaatacgtaggtggcgagcgttatccggattactgggtgtaaagggcgttaggc  
ggtcttcaagtcggaagtgaataatcatggctcaactgtgaactgcttacgaaaactggaggacttgagtactagaggggaagggc  
gaattcctagtgtagcggtaaaatgcgtagagattaggaagaacaccgggtggcgaaggcggccttctggctagcaactgacgctga  
ggcgcgaaagcgtggggagcaaacaggattagataccctgtagtccatgccgtaaaccggtgggcgctaggtggtgggttcttcca  
cgggatccgtgccgtagctaacgcattaagcgccccgctggggagtacggccgca

>GM2GI8201EJGYV

gcaccggctaactacgtgccagcagccgcggaatacgtaggggtgcgagcgttgcggaattactgggcgtaaagagctcgtagg  
cggttgtcacgctcgtctgtgaaatcctagggcttaaccctggacgtgcagggcgtacgggctgacttgagtactacaggggagactg  
aattctggtgtagcgggtggaatgcacagatatcaggaagaacaccgatggcgaaggcaggctctctgggtagtaactgacgctgagg  
agcgaagcatgggtagcgaacaggattagataccctgtagtccatgccgtaaaccggtgggcgctaggtggtgggttcttccacg  
ggctccgtgccgtagctaacgcattaagcgccccgctggggagtacggccgca

>GM2GI8201DVE6C

gccccggctaactacgtgccagcagccgcggaatacgtagggcgcaagcgttgcggaattattgggcgtaaagagctcgtagg  
cggctgtcgcgtctgccgtgaaaacctgcagcttaactgtgggcttgcggtgggtacgggctggcttgagtgcagtaggggagactg  
gaattcctggtgtagcgggtggaatgcgcagatatcaggaggaacaccgggtggcgaaggcgggctctctgggctgttactgacgctgag  
gagcgaagcatggggagcgaacaggattagataccctgtagtccatgccgtaaaccggtgggcactaggtggtgggggcccagttcc  
atggttctgtgccgtagctaacgcattaagtccccgctggggagtacggccgca

>GM2GI8201DCAMH

ggtaccggctaattacgtgccagcagccgcggaatacgtaggaccgagcgttgcggaatcattgggcgtaaagagtagctag  
gcggtaaagataagttagaagtaaaaggcaccggctcaaccggcgtaaagctttaaaactgtttacttgagacattgggggaaagtgg  
aattctagtgtagcgggtgaaatgcgcagatattaggaagaataccagaggcgaaagcgacttctagcgtgatctgacgctgaggt  
acgaaagcgtgggaagcaaacaggattagataccctgtagtccacgccgtaaaccgatgagtgttagatgtccaggttaaactgg  
gtgtcggaagccaacgcgataaaactccgctggggagtacgcacgca

>GM2GI8201EWXWS

gccccggctaactacgtgccagcagccgcggaatacgtagggggctagcgttatccggattactgggcgtaaaggggtcgttaggt  
ggtcttcaagtcagtggttaaagcctacggctcaaccgtagtcagcctctgaaactggaagacttgagtgcaggagaggaaagtgg  
aattcccagtgtagcgggtgaaatgcgtagatattgggaggaacaccagtagcgaaggcggccttctggactgcaactgacactgagg  
cacgaaagcgtgggtagcaaacaggattagataccctgtagtccacgccgtaaaccgatgagtactaggtgtcgggggttaccctc  
cgggtccgcagctaacgcattaagtactccgctggggagtacgcacgca

>GM2GI8201A54TO

gccccggctaactacgtgccagcagccgcggaatacgtagggggctagcgttgcggaatcactgggcgtaaaggggtcgcagg  
cggaaatgcaagtcagatgtaaaggcagtagcttaactactgtaagcatttgaaactgtatatcttgagaagtgtagaggtaagtgg  
attttagttagcgggtgaaatgcgtagatattaaaagaataccgggtggcgaaggcgacttactgggcacattctgacgctgaggaa

cgaaagcgtggtagcaaacaggattagataccctggtagtcacgctgtaaacgatgagtgctaggtgctcgcaaaagtcgggtgc  
cgcagtaacacattaagcactccgcctggggagtagctgcgca

>GM2GI8201BUV42

gcctcggctaactacgtgccagcagccgcggtaaaacgtaggaggcgagcgttatccggattactgggtgtaaagcgcgtgcagg  
cggtttgctaagttggatgtgaaagctcctggctcaactgggagaggctgtcaagactggcagactggagagcagtaggggaaggt  
ggaattccgggtgtagtgggaaatgctagatataccggaggaacaccagtgccgaaagcggccttctggactgcatctgacgctca  
gacgcgaaagctaggggagcaaacgggattagagaccccggtagcttagccgtaaacaatgtgaactggcgtggacgggta  
aaaccgatcagtgccgaagcaaacgcgataagttcaccacctggggactacggccgca

>GM2GI8201CQ1HD

gccacggctactacgtgccagcagccgcagtaatacgtagggtcccgagcgtgtccggattattggcgtaaagcgcgagcagggc  
ggtttaataagctgaagftaaaggcagtggttaaccattgttcgcttggaaactgttaaactgagtgacagaaggggagagtggaatt  
ccatgtgtagcgggtgaaatgctagatataatggaggaacaccgggtggcgaagcggctctctggtctgtaactgacgctgaggctcg  
aaagcgtggggagcaaacaggattagataccctggtagtcacgcccgtaaacgatgagtgctaggtgttaggcccttccggggctt  
agtgccgcagctaacgcattaagcactccgcctggggagtagcaccgca

>GM2GI8201BX8FA

gccacggctaactctgtgccagcagccgcggtaaacagaggtggcaagcgtgttcggaattactggcgtaaagggcgctaggg  
cggctgccaagtcctggtgaaagccctcggtcaaccgaggaacggcgcgggaaactagcaggcttgagttcgggagagggga  
agcggaaattccgggtgtagcgggtgaaatgctgagatataccggaggaacaccgggtggcgaagcggccttctggaccgacactgac  
gctgaggcgcgaaagctaggggagcaaacgggattagataccccggtagcttagccctaaacgatgagcactgggtgtagagg  
gtatgaacccttctgtgccgaagctaacgcattaagtgtccgcctggggagtagcggctgca

>GM2GI8201AJ8FL

gcaccggctaactccgtgccagcagccgcggtaaacagaggtgcaagcgttatccggattactgggttaaaggggtgctaggtg  
gggcagttaagtcagtggtgaaatcctgggctcaaccggaactgccattgatactatctgtctgaaatcgttgaggtaaagcggga  
atatgtcatgtagcgggtgaaatgcttagatatacagaacaccaattgcaagggcagcttgtaaccgaatattgacactgaggca  
cgaaagcgtgggatcaaacaggattagataccctggtagtcacgcccctaaacgatggatactgcacatacgcgatacagtggtg  
tgtctgagcgaagcattaagtatcccacctgggaagtagcaccgca

>GM2GI8201B8GJO

gcaccggctaatacgtgccagcagccgcggtaaacagtaggtgtagcagcgttatccggattactggcgtaaagagctcgtaggtg  
gttgtcgcgtcgtctgtgaaatcctggggcttaactccgggctgagggcagatacgggcataactgagtagtaggggagactgga  
attcctggtgtagcgggtgaaatgctgagatatacaggaggaacaccgggtggcgaagggcggctctgggcagtaactgacgctgagg  
agcgaagcagtaggggagcgaacaggattagataccctggtagtcacgcccctaaacgatggatactgcacatacgcgatacagtggtg  
ggatccgtgccgtagtaacgcattaagcgcctggggagtagcggccgca

>GM2GI8201DZ2I5

gccacggctaactacgtgccagcagccgcggtaaacagtaggtggcagcgttatccggattactgggtgtaaagggcgtgtagac  
ggattcgtagttggctgttaacctgggggctaaacccccggactgcagccgaaactgaggatcttgagtaccagaggggaaagcg  
gaattcctagtgaggcggtaaaatgcatagagattaggaagaacaccgggtggcgaagggcggcttctggctggcaactgacgttagg

gcgcgaaagtatgggtagcgaacaggattagataccctggtagtcataccgtaaacgatgaatactaggtgtaggaggtatcgact  
ccttctgtgccgaaacgaacgcattaagtattccacctggggagtagcgcga

>GM2GI8201A4RU1

gccccggctaactacgtgccagcagccgcggaatacgtagggggcgagcgttgcggaattattggcgtaaagggtagcagg  
cggcttttaagttgacgtgaaagcccgggcttaactccggcgagcgttgaactggaggccttgagtgatggaagggacagtg  
aattcctggtgtagtggtgaaatgcgagagatcaggaagaataaccagtgccgaaggcgactgtctggacattaactgacgctgag  
tacgaaagcgtggggagcaaacaggattagataccctggtagtcacgcccgtaaacgatgaatactaggtgtaggggtagcacc  
ccccctgtccggcgtaacacaataagtattccgcctgggaattacgtagcga

>GM2GI8201DGM1Q

gccacggctaactacgtgccagcagccgcggaatacgtaggtggcgagcgttaccggattactgggtgtaaagggcgttaggc  
ggtctttcaagtcggaagtgaattcatggctcaactgtgaactgcttacgaaactggaggacttgagtactagaggggaaggcgg  
aattcctagtgtagcggtaaaatgctagagattaggaagaacaccgggtggcgaaggcggccttctggctagcaactgacgctgag  
gcgcgaaagcgtggggagcaaacaggcttagataccctggtagtcacgctgtaaaccggtgggtactaggtgtgggatccattccac  
ggattctgtccgtagtaacgcattaagtacccccgcctggggagtagcggccgca

>GM2GI8201EH5RS

gcaccggctaactacgtgccagcagccgcggaatacgtagggggcgagcgttgcgggattattggcgtaaagggtagcagg  
cggcttttaagttgacgtgaaagcccgggcttaactccggcgagcgttgaactggaggccttgagtgatggaagggacagtg  
aattcctggtgtagtggtgaaatgcgagagatcaggaagaataaccagtgccgaaggcgactgtctggacattaactgacgctgag  
tacgaaagcgtggggagcaaacaggattagataccctggtagtcacgcccgtaaacgatgaatactaggtgtcgggttcaaagca  
attcgggtcccagcaaacgcaataaacactccgcctggggagtagcgcagca

>GM2GI8201DF482

gccacggctaactacgtgccagcagccgcggaatacgtaggtggcgagcgttaccggattactggcgtaaagggagcgtagg  
cggatgattaagtgggatgtgaaatacccgggctcaactgggtgctgattccaaactggtatctagagtgcaggagaggagagt  
gaattcctagtgtagcggtaaatgctagagattaggaagaacaccagtgccgaaggcgactctctggactgtaactgacgctgag  
gctcgaagcgtggggagcaaacaggattagataccctggtagtcacgcccgtaaacgatgaatactaggtgtgggggttcaaca  
cctccgtgccgccaacgcattaagtattccgcctggggagtagcggtagcga

>GM2GI8201ECO96

ggtccggctaattacgtgccgagccgcggaatacgtagggaccgagcgttgcggaatcattggcgtaaagggtagcaggc  
ggctaattaagtaggagtgaaagccatagctcaactatagtaagctttaaaactgattagcttgagtaattgaaggtaagtggaat  
tcctagttagcggtaaatgcgagatattaggaagaataccagaggcgaaagcgactttctagcgtgctctgacgctgaggtag  
gaaagcgtgggtagcaaacaggattagataccctggtagtcacgcccgtaaacgatgagtgtaggtgtctgggagaacctgggtg  
cacagcaaacgcaataaacactccgcctggggagtagcgcagca

>GM2GI8201EDA0L

ggtccggctaattacgtgccagcagccgcggaatacgtagggaccgagcgttgcggaatcattggcgtaaagggtagcaggc  
ggactgaaagttgatgtgaaagcccgggcttaaccccggcgagcgttaaaaactacaggccttgagtgtagaaggatcgtgg  
aattcctagtgtagcggtaaatgctagagattaggaagaataaccagtgccgaaggcgactctggataccaactgacgctgag

gtacgaaagcgtggggagcaaacaggatcagataccctgtagtccacgctgtaaacgatgagtgaagggtgtgggggtcaaac  
cccgggtccgccgtaaacacagtaagcactccgcctggggagtagctacgca

>GM2GI8201BG5X9

gcaccggctaactacgtgccagcagccgcggaatacgtaggggtgcgagcgtgtccggaattactgggcgtaaagggctcgtaggt  
ggttgtcgcgctcgtctgtgaaattccggggcctaactccgggcgtgcaggcgatacgggcataactgagtacttaggggtaactgg  
aattcctggtgtagcgggtgaaatgcgagatatacaggaggaacaccgatggcgaaggcaggttactggcagttactgacgctgag  
gagcgaagcatggtagcgaacaggattagataccctgtagtccatgccgtaaacggtgggcgctaggtgtgagggcttttcac  
gacttctgtccgtagtaacgcattaagcgcctggggagtagcggccgca

>GM2GI8201E27FT

gccccggctaactacgtgccagcagccgcggaatacgtagggggcgagcgtgtccggaattattgggcgtaaagggctcgtaggt  
cggcttttaagttgacgtgaaagccccgggctaactccggcaagcgttgaaaactggagagcttgagtgatggaagggacagtggt  
aattcctggtgtagtggtgaaatgcgagatattaggaagaataaccagtggcgaagcgactactggcaattaactgacgctgaggt  
acgaaagcgtggggagcaaacaggatcagataccctgtagtccacgctgtaaacgatgagtgaagggtgtgggggtcaaacc  
cgggtccgccgtaaacacagtaagcactccgcctggggagtagcggccgca

>GM2GI8201DLIU2

gccccggctaactacgtgccagcagccgcggaatacgtaggggtgcgagcgtgtccggaattattgggcgtaaagggctcgtaggt  
gtcgattgcgtcgggaagtggaaacctgcccgttaaccgtgggcgtgctccgatacgggtgacttgaggaaggtaggggagaatg  
aattcctggtggagcgggtggaatgcgagatatacaggaggaacaccagtggcgaagcggttctctggaccttctgacgctgag  
agcgaagcgtggggagcaaacaggcttagataccctgtagtccacgctgtaaacggtgggtactaggtgtgggatccattccac  
ggattctgtccgtagtaacgcattaagtagccccgcctggggagtagcggccgca

>GM2GI8201DPFUW

gcaccggctaactacgtgccagcagccgcggaatacgtaggggtgcgagcgtgtccggaattattgggcgtaaagggctcgtaggt  
ggtcgattgcgtcgggaagtggaaacctgcccgttaaccgtgggcgtgctccgatacgggtgacttgaggaaggtaggggagaatg  
gaattcctggtggagcgggtggaatgcgagatatacaggaggaacaccagtggcgaagcggttctctggaccttctgacgctgag  
gagcgaagcgtggggagcaaacaggcttagataccctgtagtccacgctgtaaacgatgagtctagatgtcgggtgtcaaagc  
ccggtatcgcgtaaacacattaagcactccgcctggggagtagcggccgca

>GM2GI8201CSLZF

gccacggctaactacgtgccagcagccgcggaatacgtaggtggcgagcgttatccggattactgggtgtaaagggcgtgtaggc  
ggtcttcaagtcggaagtgaaaattcatggctcaactgtgaactgcttacgaaactggaggacttgagtactagaggggaaggcgg  
aattcctagtgtagcggtaaatgctagagattaggaagaacaccggtggcgaagggcgccttctggctagcaactgacgctgag  
gcgcgaagcgtggggagcaaacaggatcagataccctgtagtccacgctgtaaacgatgagtgaagggtgtgggggtcaaac  
ctcgggtccgccgtaaacacagtaagcactccgcctggggagtagcggccgca

>GM2GI8201D3LZ3

ggtccggctaattacgtgccagcagccgcggaatacgtagggaccgagcgtgtccggaattattgggcgtaaagggctcgtaggt  
ggtcgattgcgtcgggaagtggaaacctgcccgttaaccgtgggcgtgctccgatacgggtgacttgaggaaggtaggggagaatg  
gaattcctggtggagcgggtggaatgcgagatatacaggaggaacaccagtggcgaagcggttctctggaccttctgacgctgag

gagcgaaagcgtggggagcaaacaggcttagataccctgtagtccacgctgtaaacgggtgggtactaggtgtgggatccattcca  
cggattctgtgccgtagctaacgcattaagtacccccgctggggagtacggccgca

>GM2GI8201EZ0EW

ggtccggctaattacgtgccagcagccgcgtaatacgttaaggaccgagcgttgcggaattattgggcgtaaaggtacgtaggc  
ggcttttaagttgacgtgaaagcccgggcttaactccggcaagcgtgaaaactggagagcttgagtgtggaagggacagtgg  
aattcctggtgtagtggtaaatgcgagagatcaggaagaataaccagtggcgaaggcgactgtctggacattaactgacgctggg  
tacgaaagcgtggggagcaaacaggattagataccctgtagtccacgctgtaaacgatgagtgttaggtgtctgggagaacctggg  
tgccacagcaaacgcaataaacactccgcctggggagtacgcacgca

>GM2GI8201BMZIH

ggtccggctaattacgtgccagcagccgcgtaatacgttaaggaccgagcgttgcggaatcattgggcgtaaagagtacgtaggc  
ggtaaaataagttagaagtaaaaggcaccggctcaaccggtgaagctttaaaactgtttacttgagacattgaggggaaagtga  
atttctagtagcgggtgaaatgcgagatattaggaagaataaccggtggcgaagcgactttctagcgtatgtctgacgctgaggtac  
gaaagcgtgggaagcaaacaggattagataccctgtagtccacgcccgtaaacgatgagtgttagatgtccgaggtaaactgggtg  
tccaagcaaacgcgataaacactccgcctggggagtacgtacgca

>GM2GI8201ERK6Q

ggtccgctaatacgtgccagcagccgcgtaatacgttaaggaccgagcgttgcggaatcattgggcgtaaagagtacgtaggc  
gtatgataagtaggagtaaaaggcaccggctcaaccggtgaagctttaaaactgtcatacttgagacattgaggggaaagtga  
atttctagtagcgggtgaaatgcgagatattaggaagaataaccagagggcgaagcgactttctagcgtatgtctgacgctgaggt  
cgaaagcgtgggaagcaaacaggattagataccctgtagtccacgcccgtaaacgatgagtgttagatgtccgaggtaaactgggt  
gtcacaagccaacgcgataaacactccgcctggggagtacgtacgca

>GM2GI8201CQYBD

gccccggctaactacgtgccagcagccgcgtaatacgttagggggcgagcgttgcggaattattgggcgtaaaggtacgtagg  
cggcttttaagttgacgtgaaagcccgggcttaactccggcaagcgtgaaaactggagggcttgagtgtggaagggacagtgg  
aattcctggtgtagtggtaaatgcgagagatcaggaagaataaccagtggcgaaggcgactgtctggacattaactgacgctgagg  
tacgaaagcgtggggagcaaacaggatcagataccctgtagtccacgctgtaaacgatgagtgtcaaggtgtgggggtcaaact  
cgggtcccggtaaacacagtaagcactccgcctggggagtacgtacgca

>GM2GI8201AECWQ

gccccggctaactacgtgccagcagccgcgtaatacgttagggggcgagcgttgcggaattattgggcgtaaaggtacgtagg  
cggcttttaagttgacgtgaaagcccgggcttaactccggcaagcgtgaaaactggagggcttgagtgtggaagggacagtgg  
aattcctggtgtagtggtaaatgcgagatattaggaagaataaccagagggcgaagcgactttctagcgtatgtctgacgctgaggt  
acgaaagcgtgggaagcaaacaggattagataccctgtagtccacgcccgtaaacgatgagtgttagatgtccgaggtaaactgg  
gtgtcgggaagccaacgcgataaacactccgcctggggagtacgcacgca

>GM2GI8201CJA2T

gccccggctaactacgtgccagcagccgcgtaatacgttagggggcgagcgttgcggaatcattgggcgtaaaggtacgtagg  
gctgctaattaagttaggagtgaaaagccatagctcaactatagtaagctttaaaactgtcatacttgagacattgaggggaaagtgg  
aatttctagtagcgggtgaaatgcgagatattaggaagaataaccagagggcgaagcgactttctagcgtatgtctgacgctgaggt



acgaaagcgtgggaagcaaacaggattagataccctggtagtcacgcccgtaaacgatgagtgtagatgtccgaggtaaacttgg  
gtgcacaagccaacgcgataaacactccgctggggagtagtacgca

>GM2GI8201BPOWS

gcaccggctaactacgtgccagcagccgcgtaatacgtagggtgcgagcgtgtccggattattgggcgtaaagggctcgtaggc  
ggtcgattgcgtcggaagtggaaacctgcccgttaacctgggctgtccgatacgggtgacttgaggaaggtaggggagaatg  
gaattcctggtggagcgggtggaatgcgagatatacaggaggaacaccagtgccgaaggcggttctctggaccttctgacgctgag  
gagcgaagcgtggggagcaaacaggcttagataccctggtagtcacgctgtaaaccggtgggtactaggtgtgggatccattcca  
cggattctgtgccagcaaacgcaataaacactccgctggggagtagcacgca

>GM2GI8201D40A5

gccccggctaactacgtgccagcagccgcgtaatacgtagggggcgagcgtgtccggaattattgggcgtaaagggtagcagg  
cggcttttaagttgacgtgaaagccccgggcttaactccggcaagcgttgaaaactggagggcttgagtgatggaagggacagtg  
aattcctggtgtagtggtgaaatgcgagagatcaggaagaataaccagtgccgaaggcactgtctggacattaactgacgctgag  
tacgaaagcgtggggagcaaacaggatcagataccctggtagtcctgcccgtaaaccggtgggcgctaggtgtgggttctccacg  
ggatccgtgccgtagtaacgcattaagcggccccgctggggagtagcggccgca

>GM2GI8201C4F96

gccccggctaactacgtgccagcagccgcgtaatacgtagggggcgagcgtgtccggaatgattgggtgtaaagggtagcagg  
cggctattaagttggcgtgaaagccccgggcttagctccggaagcgttgaaaactggtagacttgaatggaagagatagtg  
aattcctagtgtagcggtgaaatgcgtagagattaggaagaataccaatggcgaaagcaactatctggacacattgacgctcagg  
acgaaagcgtggggagcaaacaggattagataccctggtagtcacgctgtaaaccgatgagtgtaggtgtctgggagaacctgggt  
gccacagcaaacgcaataaacactccgctggggagtagcacgca

>GM2GI8201CFEBE

ggtccggctaattacgtgccagcagccgcgtaatacgtaggggtgcgagcgtgtccggaatcattgggcgtaaagagtagcaggc  
ggtagataagttaggagtaaaaggcaccggctcaaccggcgtgaagctttaaaactgtttacttgagacattgaggggaagtggaa  
ttctagtgtagcggtgaaatgcgagatattaggaagaataaccagtgccgaagcgaacttactggcaattaactgacgctgaggta  
gaaagcgtgggtagcaaacaggattagataccctggtagtcacgctgtaaaccgatgagtgtaggtgtctgggagaacctgggtg  
cacagcaaacgcaataaacactccgctggggagtagcacgca

>GM2GI8201DDCSF

gcaccggctaactacgtgccagcagccgcgtaatacgtaggggtgcgagcgtgtccggattattgggcgtaaagggctcgtaggc  
ggtcgattgcgtcggaagtggaaacctgcccgttaacctgggctgtccgatacgggtgacttgaggaaggtaggggagaatg  
gaattcctggtggagcgggtggaatgcgagatatacaggaggaacaccagtgccgaaggcggttctctggaccttctgacgctgag  
gagcgaagcgtggggagcaaacaggcttagataccctggtagtcacgctgtaaaccggtgggtactaggtgtgggatccattcac  
ggattctgtgccgtagtaacgcattaataccccgctggggagtagcggcga

>GM2GI8201AHX3E

gcacggctaactccgtgccagcagccgcgtaatacggaggatgcgagcgttatccggattattgggttaaaagggctcgtagggt  
ttttgtaagtcagtggtgaaaccccggtcaacccggcgtgacattgaaactgcagaactgagaatggacgagggcaggcggga  
atgtgtggtgtagcgggtgaaatgcatagatatacacagaaacaccgattgccaagggcagctgccagaccatctgacactgaagc

acgaaagcgtgggtatcgaacaggattagataccctggtagtcacgcagtaaacgatgattactgggagttgtctgcttaataggat  
aagcttctgagcgaagattaagtaatccacctggggagtagcgcgca

>GM2GI8201D3EJB

gcaccggctaactacgtgccagcagccgcggaatacgtagggtgcgaacgtgtccggaattactgggtgtaaaggggtgcacagg  
cggcttggcgtcaggggtaaataccactgtcaacagtgagggtgcccttgatacggctgggctgaatttaagagaggatgatag  
aatcctggtgtagcggtgaaatgcgtagatatacaggaggaataaccagtggcgaaggcggatccggcttaattattgacgctaagc  
acgaaagcgtgggtagcgaacaggattagataccctggtagtcacgcacctaaacgatgatgcttgggtgtgggtttgacctca  
gtgccgtaggtaacccgtaagcataccacctggggagtagcgcgca

>GM2GI8201A4EW0

gccccggctaactacgtgccagcagccgcggaatacgtagggggcgagcgtgtccggaattactgggcgtaaaggggtcgcagg  
cggcatggcaagtccgatgtaaaggcgaaggctcaacctcgtgaagcatcggaaactgtcaagcttgaggaaggagaggcaag  
tggattcctagtagcgggtggaatgcgtagatattaggaggaataaccggtggcgaaggcgaactgtgactcaactgacgctga  
ggaacgaaagcgtgggtagcaaacaggattagataccctggtagtcacgcctgaaacgatgagtgctaggtgctgggggtcaaa  
cctcgggtgccgccgtaacacaataagcactccgctggggagtagcgcgca

>GM2GI8201D6UXV

gtatcggctaactccgtgccagcagccgcggaatacggaggatacgcggtatccggatttattgggttaaaaggggtcgtaggtgg  
cgaattaagtcagtggtgaaaagctacagctcaactgtagtcgtgccgtgaaactgggttgcttgagagaagacgaggtatcggaa  
tgtgtagtagcggtgaaatgcatagatattacacagaacgccgattgcgaaggcagcgtaccaggctttatctgacactgaggcac  
gaaagcgtgggtatcaaacaggattagataccctggtagtcacgcctgaaacgatgaatactagattttgcgatatacagtaagagt  
ctaagcgaagcagataagattccacctggggagtagcgcgca

>GM2GI8201CX613

gccccggctaattacgtgccagcagccgcggaatacgtaggggcgagcgtgtccggaattattgggcgtaaagagtgctaggg  
ggcaattaagtcagatgtgaaaactgtgggctcaaccctagattgcatctgaaactgatatgcttgagtcagggagaggaaagtg  
gaattcctagtagcgggtggaatgcgtagatattaggaggaataaccggtggcgaaggcgaactttctggactgtactgacgctgaggc  
acgaaagcgtggggagcaaacaggattagataccctggtagtcacgcctgaaacgatgagtgctaggtgctgacgtaaatgtag  
gtgccgtaggtaacacaataagcactccgctggggagtagcgcgca

>GM2GI8201CHGJ1

ggtccggctaatacgtgccagcagccgcggaatacgtaggaccgagcgtgtccggaatcattgggcgtaaaggggtacgtaggg  
ggctaattaagtaggagtgaaaagccatagctcaactatagtaagcttttaaactgattagcttgagtaattgaagggttaagtgaat  
tcctagtagcgggtgaaatgcgcagatattaggaagaataaccagtgccgaaagcgaactactggcaattaactgacgctgaggtag  
gaaagcgtgggtagcaaacaggattagataccctggtagtcacgcctgaaacgatgaatacttgatgtaggaggtatcgaccctt  
ctgtgtcgaagtaacgtattaagattccacctggggagtagcgcgca

>GM2GI8201C5YAQ

gtctcggctaactacgtgccagcagccgcggaatacgtaggagacgagcgttatccggatttactgggcgtaaagcgcgtgcagg  
cggctcagcaagttggatgtgaaagctcctggcctaactgggagaggtcgttcaaaactactggacttgagtggttagaggagggtg  
gaattccgggtgtagtggtgaaatgcgtagatataccggaggaacaccagtgccgaaagcggcctcctggaccattactgacgctcag

acgcgaaagctagggtagcaaacgggattagagacccccggtagtcctagctgtaaactatgtagacttggcgttgggtggttttaaatcc  
atcagtcccgaagcaaacgcgataagtctaccgcctggggactacggccgca

>GM2GI8201A21T2

gcaccggctaactacgtgccagcagccgcggaatacgtaggggtgcgagcgttgcggaattactgggcgtaaagagctcgtaggt  
ggtttgcgctcgtttgtgaagtccacggcttaactgtgggactgcaggcgatacgggcataacttgagtgtctgtaggggagactgga  
attcctggtagcggtgaaatgcgagatatcaggaggaacaccgatggcgaaggcaggctctctgggcagtaactgacgctgagg  
agcgaagcatggtagcgaacaggattagataccctggtagtcacgcgtgtaaacgatgagtgcaagggttgggggtcaaact  
cggtgcccggttaacacagtaagcactccgcctggggagtacgtacgca

>GM2GI8201CI6QJ

gccacggctactacgtgccagcagccgcggaatacgtaggtggcaagcgttatccggaattattgggcgtaaagcgcgctagggc  
ggtttctaagtctgatgtgaaagccccggctcaaccggggagggcattggaaactgggaaactgagtgacagaaggagagagtg  
gaattccatgttagcggtgaaatgcgagagatatggaggaacaccagtggcgaaggcggctctctggtctgtaactgacgctgag  
gtgcgaaagcgtggggatcaaacaggattagataccctggtagtcacgcctgaaacgatgagtgtagatgtccgaggtaaactg  
ggtgtcacaagccaacgcgataaaactccgcctggggagtacgtacgca

>GM2GI8201EDNEK

gccacggctaactacgtgccagcagccgcggaatacgtaggtggcaagcgttgcggaattattgggcgtaaagcgcgctagggc  
cggctcttaagtctgatgtgaaagcccacggctcaaccgtggagggcattggaaactggggacttgagtgacaggagagaagagt  
ggaattccacgttagcggtgaaatgcgtagagatgtggaggaacaccagtggcgaaggcggactcttggcctgtaactgacgctga  
ggcgcgaaagcgtggggagcaaacaggattagataccctggtagtcacgcctgaaacgatgagtgtaagtgttagagggttcc  
gccctttagtctgcagtaaacgcattaagcactccgcctggggagtacggccgca

>GM2GI8201CL404

gcaccggctaactacgtgccagcagccgcggaatacgtagggggcgagcgttgcggaattattgggcgtaaagggtacgtagggc  
ggcttttaagttgacgtgaaagcccgggcttaactccggcaagcgtgaaaactggagggcttgagtgatggaaggacagtgga  
aattcctggttagtggtgaaatgcgagagatcaggaagaataaccagtggcgaaggcggactgtctggacattaactgacgctgagg  
tacgaaagcgtggggagcaaacaggatcagataccctggtagtcacgcctgtaaacgatgagtgcaagggttgggggtcaaact  
cggtgcccggttaacacagtaagcactccgcctggggagtacgtacgca

>GM2GI8201EVFBL

gccccggctaactacgtgccagcagccgcggaatacgtagggggcgagcgttgcggaattattgggcgtaaagggtacgtagggc  
cggcttttaagttgacgtgaaagcccgggcttaactccggcaagcgtgaaaactggagggcttgagtgatggaaggacagtgga  
aattcctggttagtggtgaaatgcgagagatcaggaagaataaccagtggcgaaggcggactgtctggacattaactgacgctgagg  
tacgaaagcgtggggagcaaacaggcttagataccctggtagtcacgcctgtaaacgggtgggtactaggtgtgggatccattccacg  
gattctgtccgtagctaacgcattaagtacccgcctggggagtacggccgca

>GM2GI8201CDN6I

gccccggctaactacgtgccagcagccgcggaatacgtagggggcaagcgttatccggatttactgggtgtaaaggagcgtaggt  
ggttcggtaagtcagatgtgaaagcccgggctcaaccccgggactgcattgaaactatcgaactagagtgtaggagaggttaagtg  
gaattcctagtagcggtgaaatgcgtagatattaggaggaacaccagtggcgaaggcggcttactggactataactgacactgag

gctcgaaagcgtggggagcaaacaggattagataccctggtagtcacgccgtaaacgatgaatactaggtgtcggggcttaattg  
acctcggtgcccgagctaacgcaataagtattccacctggggagtagctcgca

>GM2GI8201D17S6

gccacggctaactacgtgccagcagccgcggaatacgtaggtggcgagcgttatccggattactgggtgtaaagggcgttaggc  
ggtcttcaagtcggaagtgaaaattcatggctcaactgtgaactgcttacgaaactggaggacttgagtactagaggggaaggcgg  
aattcctagtgtagcggtaaaatgcgtagagattaggaagaacaccgggtggcgaaggcggccttctggctagcaactgacgctgag  
gcgcgaaagcgtggggagcaaacaggattagataccctggtagtcacgccgtaaacgatgagtgttagatgtccgaggtaaact  
gggtgtcgggaagccaacgcgataaacactccgcctggggagtagcgacgca

>GM2GI8201EQZV2

gcaccggctaactacgtgccagcagccgcggaatacgtaggggtgcgagcgttgcggattattgggcgtaaagagctcgtaggg  
ggtgatcgcgtcggaagtgaaaacctggggcttaacctggcggtcttgcgatacgggtgacttgaggaaggtaggggagaatg  
gaattcctggtggagcgggtggaatgcgcagatatcaggaggaacaccagtgccgaaggcgggttctctggaccttctgacgctgag  
gagcgaaagcgtggggagcaaacaggcttagataccctggtagtcacgcgtgtaaacgatgagtgaagggtgtgggggtcaaac  
ctcgtgtccgccgtaacacagtaagcactccgcctggggagtagctacgca

>GM2GI8201EV6VM

gccccggctaactacgtgccagcagccgcggaatacgtagggggcgagcgttatccggaattattgggcgtaaagagtgctaggtg  
gctgtgcaagcgcattgtaagataacggcttaaccggtgtatccgagcgaactggacagcttgagtacaggagaggaaagcgg  
aattcctagtgtagcggtgaaatgcgtagatattaggaagaacaccagaggcgaaggcggccttctggactgcaactgacactgagg  
cacgaaagcgtggggagcaaacaggattagataccctggtagtcacgccgtaaacgatgagcactaggtatcggggtcagaag  
acttcggtgccgccgtaacgcattaagtgtccgcctggggagtagctacgca

>GM2GI8201CX4VQ

gcaccggctaactacgtgccagcagccgcggaatacgtaggggtgcgagcgttgcgggaattattgggcgtaaagagctttaggc  
ggttctcgcgtctgccgtgaaaatccgaggctcaacctcggacttgcggtgggtacgggcagactagagtgtgtaggggagactg  
gaattcctggtgtagcggtgaaatgcgcagatatcaggaggaacaccgatggcgaaggcagggtctctggccactactgacgctga  
gaagcgaagcatggggagcgaacaggattagataccctggtagtcacgcgtgtaaacggtgggaactaggtgtgggtctcattcca  
cgagatccgtgcccgagctaacgcattaagttccccgcctggggagtagcgccgca

>GM2GI8201A76FJ

gccccggctaactacgtgccagcagccgcggaatacgtagggggcgagcgttgcgggaattattgggcgtaaagggtagctagg  
cggcttttaagttgacgtgaaagcccggggcttaactccggcaagcgttgaaaactggagggttgagtgtggaagggacagtgg  
aattcctggtgtagtggtgaaatgcgcagagatcaggaagaataaccagtgccgaaggcactgtctggacattaactgacgctgag  
tacgaaagcgtggggagcaaacaggatcagataccctggtagtcacgcgtgtaaacgatgagtgaagggtgtgggggtcaaacct  
cgggtgccgccgtaacacagtaagcactccgcctggggagtagcaccgca

>GM2GI8201BVUW9

gccccggctaactacgtgccagcagccgcggaatacgtagggggcgagcgttgcgggaatgattgggtgtaaagggtagcgagg  
cggcttattaagttggcgtgaaagcccggggcttaactccggcaagcgttgaaaactggagggttgagtgtggaagggacagtg  
gaattcctggtgtagtggtgaaatgcgcagagatcaggaagaataaccagtgccgaaggcactgtctggacattaactgacgctgag

gtacgaaagcgtggggagcaaacaggatcagataccctgtagtccacgctgtaaacgatgagtgaagggtgtgggggtcaaac  
ctcggtgccgccgtaacacagtaagcactccgcctggggagtacgtacgca

>GM2GI8201D64J1

gccccggctaactacgtgccagcagccgcggaatacgtagggggcgagcgtgtccggaattattgggcgtaaagggtacgtagg  
cggcttttaagttgacgtgaaagccccggggcttaactccggcaagcgtgaaaactggagggcttgagtgatggaagggacagtg  
aattcctggtgtagtggtgaaatgcgagagatcaggaagaataaccagtggcgaaggcgactgtctggacattaactgacgctgagg  
tacgaaagcgtgggtagcaaacaggattagataccctgtagtccacgctgtaaacgatgagtgttaggtgtctggggtagcctgggt  
gccgccgtaacacagtaagcactccgcctggggagtacgtacgca

>GM2GI8201DKIUO

gccccggctaactacgtgccagcagccgcggaatacgtagggggcaagcgtgtccggaattattgggcgtaaagggtacgtagg  
cggacttgaaagttgacgtgaaagccccggggcttaacccccggcgagcgttaaaaactacaggccttgagtggtagaagggatcgt  
ggaattcctagtgtagcggtgaaatgcgtagagattaggaagaataaccagtggcgaagcgacgatctggataccaactgacgctg  
aggtacgaaagcgtggggagcaaacaggattagataccctgtagtccacgctgtaaacgatgagtgttaggtgtgggggtcaa  
cctcgggtgccgacgttaacacattaagcactccacctggggagtacgcacgca

>GM2GI8201DHEW3

gccccggctaactacgtgccagcagccgcggaatacgtagggggcgagcgtgtccggaattattgggcgtaaagggtacgtaggc  
ggtcgattgctcggaagtggaaacctgcccgttaacctgggctgtccgatacgggtgacttgaggaaggtaggggagaatg  
gaattcctggtggagcgggtgaaatgcgagatacaggaggaacaccagtggcgaagggcgttctctggacctttctgacgctgag  
gagcgaagcgtggggagcaaacaggcttagataccctgtagtccacgctgtaaacgggtgggtactaggtgtgggatccattcca  
cggattctgtgccgtagctaacgcattaagtacccccgcctggggagtacggccgca

>GM2GI8201DCAG6

gccccggcctaactacgtgccagcagccgcggaatacgtagggggcgagcgtgtccggaattattgggcgtaaagggtacgtagg  
gcgacttgaaagttgacgtgaaagccccggggcttaacccccggcgagcgttaaaaactacaggccttgagtggtagaagggatc  
gtggaattcctggtgtagtggtgaaatgcgagagatcaggaagaataaccagtggcgaaggcgactgtctggacattaactgacgct  
gaggtagcgaagcgtggggagcaaacaggatcagataccctgtagtccacgctgtaaacgatgagtgaagggtgtgggggtca  
aacctcgggtgccgccgtaacacagtaagcactccgcctggggagtacgtacgca

>GM2GI8201ATHST

ggtccggctaattacgtgccagcagccgcggaatacgtagggggcgagcgtgtccggaatcattgggcgtaaagagtacgtaggc  
ggtagataagftagaagtaaaaggcaccggctcaaccggcgttaagcttttaaaaactgtttactgagacattgagggggaagtgg  
aatttctagttagcggtaaaatgcgtagagattaggaagaacaccggtggcgaaggcggccttctggctagcaactgacgctgagg  
cgcgaagcgtggggagcaaacaggattagataccctgtagtccacgagtaaacgatgaatacttgatgtaggaggtatcgacc  
ccttctgtgcaagftaacgtattaagtattccacctggggagtacgaccgca

>GM2GI8201ANBNR

gccccggctaactacgtgccagcagccgcggaatacgtagggggcgagcgtgtccggaattattgggcgtaaagggtacgtagg  
cggcttttaagttgacgtgaaagccccggggcttaactccggcaagcgtgaaaactggagggcttgagtgatggaagggacagtg  
aattcctggtgtagtggtgaaatgcgagagatcaggaagaataaccagtggcgaaggcgactgtctggacattaactgacgctgagg

tacgaaagcgtggggagcaaacaggattagataccctggtagtcacgcccgtaaacgatgagtgtagatgtccgaggtaaactgg  
gtgtcacaagccaacgcgataaacactccgctggggagtagctacgca

>GM2GI8201AJY37

gcaccggctaactctgtgccagcagccgcggtataacagaggggtgcgagcgtaacggttactgggcgtaaagcgcgcgtaggt  
ggtaattaagtcaaatgtgaaatccccgagcttaactgggaattgcattcgatactggtagctagagtagatgggagaggatggtagaa  
ttccagggtagcgggtgaaatgcgtagagatctggaggaataccgatggcgaaggcagccatctggcctaactgacactgaggtg  
cgaaagcatggggagcaaacaggattagataccctggtagtcacgcccgtaaacgatgtctactagccgttgggggattgatcctta  
gtggcgagctaacgcgataagtagaccgctggggagtagcggtcgca

>GM2GI8201B07Z7

gcgccggccaactacgtgccagcagccgcggtaaacgtagggcgcgagcgttgcggattattgggcgtaaagagctcgtagg  
cggcttgtgcgtcggctgtgaaatccccggttaactgcgggcttcagctgatacggcgggctagagttcggtaggggagactg  
gaattcctggtgtagcgggtgaaatgcgagatatacaggaggaacaccggtggcgaaggcgggtcctctggccgatactgacgctga  
ggagcgaagcgtggggagcgaacaggattagataccctggtagtcacgctgtaaacggtggcgctaggtgtggggggcctctc  
cggttccctgtgccgagctaacgcattaagcgcctggggagtagcggccgca

>GM2GI8201B0JWB

gccacggctaactacgtgccagcagccgcggtataacgtaggtggcgagcgttatccggattactgggtgtaaagggcgtgtagc  
ggattcgttaagttggctgttaacctgggggctaaccgggactgcagccgaaactgcggatcttgagtaccagaggggaaagcg  
gaattcctagtgagcggtaaaatgcatagagattaggaagaacaccggtggcgaaggcggcttctggctggaactgacgttag  
gcgcgaaagtagggtagcgaacaggattagataccctggtagtcacgcgagtaaacgatgaatactgatgtaggaggtatcgacc  
ccttctgtgcgaagtaacgtattaagtattccacctggggagtagcagccgca

>GM2GI8201AQHJS

ggtcggctaattacgtgccagcagccgcggtataacgtagggggcgagcgttgcgggaattattgggcgtaaagggtagctagggc  
gcttttaagttgacgtgaaagcccgggcttaactccggcaagcgttgaaaactggagggcttgagtgatggaagggacagtgg  
attcctggtgtagtggtgaaatgcgagagatcaggaagaataccagtggcgaaggcactgtctggacattaactgacgctgaggt  
acgaaagcgtggggagcaaacaggatcagataccctggtagtcacgctgtaaacgatgagtgaaggttgggggtcaaact  
cgggtcccggttaacacagtaagcactccgctggggagtagctacgca

>GM2GI8201AWLJG

gccccggctaactacgtgccagcagccgcggtataacgtagggggcgagcgttgcgggaattattgggcgtaaagggtagctagg  
cggcttctaagttgacgtgaaatccggggcttaactccggcaagcgttgaaaactgggagcttgagtgatggaagggacagtgg  
aattcctggtgtagtggtgaaatgcgagagatcaggaagaataccggtggcgaaggcactgtctggacattaactgacgctgagg  
tacgaaagcgtggggagcaaacaggatcagataccctggtagtcacgctgtaaacgatgagtgtctagatgtcgggtgtaaagct  
cggtatcggcgttaacacattaagcactccgctggggagtagctacgca

>GM2GI8201EXWSD

gccccggccaattacgtgccagcagcgcggtataacgtaagggcaagcgttgcgggaattattgggcgtaaagggcgtgtaggcg  
gttatgtaagactgatgtaaaatacattggctcaaccaatgaattgcgttgtaactgcatagctagagttcaggagagggaaactggaa  
ttccagggtgtaggggtgaaatctgtagatctggaagaacgcaaacggaaggttaagttcctggccatggactgacgctgagggc

cgaaagcgtggggagcgaacaggattagataccctgtagtccacgctgtaaacgatgtgcactaggcgtaggggtggtttaccgct  
ctgtgccgtagctaaccgtgataagtcaccgcctggggagtatgctcgca

>GM2GI8201AZC52

gccccggctaactacgtgccagcagccgcggaatacgtagggggctagcgttatccggaattactgggcgtaaaggggtcgtagg  
cggctttcaagccagaagtgaaagcctacggctcaaccgtagtaagcttttgaactgtaggacttgagtgacaggagaggagagt  
gaattcctagtgtagcggtgaaatgcgtagatattaggaggaacaccagtagcgaaggcggctctctggactgtaactgacgctgag  
gcacgaaagcgtggggagcaaacaggattagataccctgtagtccacgcccgtaaacgatgagtactaggtgtcgggggttacc  
cctcgggtgccgagctaacgcattaagtactccgcctgggaagtacgctcgca

>GM2GI8201DRFL4

ggtccggctaattacgtgccagcagccgcggaatacgtaggaccgagcgttgcggaatcattgggcgtaaagagtacgtaggc  
ggtaagataagttaggagtgaaagccatagctcaactatagtaagcttttaaaactgattagcttgagtaattgaaaggtaagtggaa  
ttcctagtgtagcggtgaaatgcgtagatattaggaagaataccagtgggcgaagcgcactactggcaattaactgacgctgaggtac  
gaaagcgtgggtagcaaacaggattagataccctgtagtccacgctgtaaacgatgagtgttaggtctgggagaacctgggtgc  
cacagcaaacgcaataaacactccgcctggggagtacgcacgca

>GM2GI8201B1B7W

gccccggctaactacgtgccagcagccgcggaatacgtaggggcgagcgttgcggaattattgggcgtaaaggggtacgtaggc  
ggactgaaagttgacgtgaaagcccgggcttaacccggcgagcgttaaaaactacaggccttgagtggtagaaggggatcgtgg  
aattcctagtgtagcggtgaaatgcgtagagattaggaagaataccagtgggcgaagcgcgatcggataccaactgacgctgag  
gtacgaaagcgtggggagcaaacaggattagataccctgtagtccacgcccgtaaacgatgagtgttagatgtcgggtgtcaaagc  
tcggtatcgggttaacacattaagcactccgcctggggagtacgtacgca

>GM2GI8201ETTHS

gccccggctaactcgtgccagcagccgcggaatacagagggggcaagcgttattcgggaattattgggcgtaaaggggcgctagg  
cggcttcgcaagtggaaagtgaaatccctcggcttaaccgaggaactgccctccaaactgcgttgcttgaggccgggagaggtgagt  
ggaattcccagtgtagcggtgaaatgcgtagatattgggaggaacaccagtgccgaaggcggctcactggaccgggtctgacgctg  
aggcgcgaaagcgtggggagcaaacgggattagatacccccgtagtcctggccctaaacgatgagtgttggtgtagcgggtatc  
gaccctgctgtgccgaagtcaacacattaagcactccgcctggggagtacggtcgca

>GM2GI8201D713I

gccccggctaactcgtgccagcagccgcggaatacagagggggcaagcgttgcggaattactgggcgtaaaggggcgctagg  
cggcctgctaagtcgaacgtgaaatccctcggctcaaccaggaactgcgtccgatactggttgcttgaatccgggagagggatgt  
ggaattccaggtgtagcggtgaaatgcgtagatattgggaggaacaccgggtggcgaaggcgcacatcctggaccggcattgacgctg  
aggcgcgaaagccaggggagcaaacgggattagatacccccgtagtcctggccctaaacgatgaatgcttggtgtggtgggtatcg  
atccctaccgtgccgaagctaacgcattaagcattccgcctggggagtacggtcgca

>GM2GI8201BS408

gccacggctaactacgtgccagcagccgcggaatacgtaggggcagcgttgcggaattactgggcgtaaagagcgcgcagg  
cggctgtgcaagtcgctgtgaaagccccggctcaactggggaggggtcacgcgatactgctgactcgaaggcaggagagggga  
agcggaaattcccgggtgtagtggtgaaatgcgtagatattgggaggaacaccagtgccgaaggcggcttctggcctgttctgacgct

gaggcgcgaaagctagggtagcaaacgggattagataccccggtagtctagccgtaaacgatggacactaggtgttgggtatc  
aaccccgccagtgccgaagctaacgcattaagtgtcccgcctggggagtacggccgca

>GM2GI8201DYYXN

ggtccggctaattacgtgccagcagccgcggaataacgtaaggaccgagcgttgcggattattgggcgtaaagggctcgtagggc  
gtcgattcgtcgggaagtggaaacctgcccgttaaccgtggcggtctccgatacgggttgacttgaggaagtaggggagaatgga  
attcctggtggagcgggtggaatgcgtagatatacaggaggaacaccagtggcgaaggcgggtctctggaccttctgacgctgaggt  
acgaaagcgtggggagcaaacaggatcagataccctggtagtccacgctgtaaacgatgagtgcagggttgggggtcaaact  
cgggtcccggttaacacagtaagcactccgcctggggagtacgtacgca

>GM2GI8201EWQ4E

gccacggctaactacgtgccagcagccgcggaataacgtaggtggcaagcgttgcggattattgggcgtaaagggagcgcagg  
cggtgacttaagtctgatgtgaaagcccacggctcaaccgtggagggtcattgaaactgggtcacttgagtgtagaagaggaaat  
ggaattccatgtgtagcggtgaaatgcttagatatacagggaacaccagtggcgaaggcgaacttctggtctacaactgacgctgag  
gctcgaagcgtggggagcaaacaggattagataccctggtagtccacgccgtaaacgatgagtgttagatgtccgaggtaaactg  
ggtgtcgggaagccaacgcgataaaactccgcctggggagtacgcacgca

>GM2GI8201A5437

ggtccggctaatacgtgccagcagccgcggaataacgtaaggaccgagcgttgcggaatcattgggcgtaaagggtagctagggc  
ggctaattaagtaggagtgaaaagccatagctcaactatagtaagcttttaaactgattagcttgagtaattgaagggtaagtggat  
tcctagtgtagcggtgaaatgcgtagatattaggaagaataaccagtggcgaagcgaacttctggcaattaactgacgctgaggtac  
gaaagcgtgggaagcaaacaggattagataccctggtagtccacgccgtaaacgatgagtgttagatgtccgaggtaaactgggtg  
tcggaagccaacgcgataaaactccgcctggggagtacgcacgca

>GM2GI8201A08OI

ggtccggctaatacgtgccagcagccgcggaataacgtaaggaccgagcgttgcggaatcattgggcgtaaagggtagctagggc  
ggctaattaagtaggagtgaaaagccatagctcaactatagtaagcttttaaactgattagcttgagtaattgaagggtaagtggat  
tcctagtgtagcggtgaaatgcgtagatatacagggaagaataaccagtggcgaagcgaacttctggacattaactgacgctgaggtac  
gaaagcgtggggagcaaacaggatcagataccctggtagtccacgctgtaaacgatgagtgcagggttgggggtcaaacctgc  
gtgcccggttaacacagtaagcactccgcctggggagtacgtacgca

>GM2GI8201DBUIO

gtctcggctaactacgtgccagcagccgcggaataacgtagggaggcagcgttatccggattcactgggcgtaaagcgcgtgcagg  
cggttcggtaagttggcgtgaaatcctggcttaactaggagaggccgttaactaccggactagagaacagtagaggaagat  
ggaattcccgggtgtagtggtgaaatgcttagatatacgggaggaacaccagtggcgaaggcgaacttctggactgttctgacgctcag  
acgcgaaagctagggtagtaaaggattagagaccccggaatcctagccgtaaacgatgtgaactggcgtcgggtggcttaaac  
actatcgggtccgaagcaaacgcgataagttaccgcctggggactacgattgca

>GM2GI8201DKNKN

gccccgctaactacgtgccagcagccgcggaataacgtagggggcaagcgttgcgggaattattgggcgtaaagggtagctagggc  
ggctgacacgtttagcgtttaaagtgggggtcaactcccatttgcgttaaaaacggtgaagcttgagtggtagaggggatcgtggaa  
ttcctggtgtagcggtgaaatgcttagagatcaggaagaataaccagtggcgaagcgcaggtctggataccaactgacgctgaggt



acgaaagcgtggggagcaaacaggatcagataccctggtagtccacgctgtaaacgatgagtgctagatgtcgggtgtcaaagcc  
cggatcgcggttaacacattaagcactccgcctggggagtacgtacgca

>GM2GI8201ARHK2

ggtccggctaattacgtgccagcagccgcgtaatacgtaggaccgagcgttgcggaatcattggcgtaaagagtacgtaggc  
ggtatgataagttaggagtaaaaggcaccggctcaaccggcgttaagctttaaaactgtcatactgagacattgaggggaaagtgg  
aatttctagttagcggtagaatgvcagatattaggaagaataccagaggcgaaagcgactttctagcgatgatctgacgctgaggt  
acgaaagcgtgggaagcaaacaggattagataccctggtagtccacgctgtaaacgggtgggtactaggtgtgggatccattccacg  
gattctgtccgtagctaacgcattaagtaccccgctggggagtacggccgca

>GM2GI8201DKFTR

ggtccggctaattacgtgccagcagccgcgtaatacgtaggaccgagcgttgcggaatcattggcgtaaagggtagctaggc  
ggctaattaagttaggagtgaaaagccatagctcaactatagtaagctttaaaactgattagcttgagtaattgaagggtaagtggat  
tcttagttagcggtagaatgvcagatattaggaagaataccagaggcgaaagcgactttctagcgatgatctgacgctgaggtac  
gaaagcgtgggaagcaaacaggattagataccctggtagtccacgctgtaaacgatgagtgtagatgtccgaggtaaactgggtg  
tcacaagccaacgcgataaacactccgcctggggagtacgtacgca

>GM2GI8201EP22Y

gccccggctaactacgtgccagcagccgcgtaatacgtaggggcaagcgttatccggaatcactggcgtaaaggggtcgtag  
gtgcttatcaagccagaggtgaaaggcagtggtcaaccattgtaagcctttgaaactgattagcttgagtgacaggagaggttaagt  
gaattcctagttagaggtgaaattcgtagatattaggaggaacaccagtggtgcaaggcgacttactggactgtaactgacactgag  
gcacgaaagcgtggtagcgaacaggattagataccctggtagtccacgctgtaaacgatgaatactaggtgtcggcgctcaaaa  
ctcgggtccgcagcaaacgcattaagtattccgcctggggagtacgcacgca

>GM2GI8201A1AE0

gccccggctaactacgtgccagcagccgcgtaatacgtaggggcaagcgttgcggaattattggcgtaaagggtagctagg  
cggcttgacacgttagcgtttaaagtggggctcaactcccatttgcgttaaaagcgtgaaagcttgagtgtagaggggatcgtgga  
attcctggttagcggtagaatgvcagatattaggaagaataccagtggtgcaaggcgacttactggataccaactgacgctgagg  
tacgaaagcgtggggagcaaacaggatcagataccctggtagtccacgctgtaaacgatgagtgtaggtgtctgggatagactggg  
tgccatagctaacgcaataaacactccgcctggggagtacgcacgca

>GM2GI8201ATG8K

gccccggctaactacgtgccagcagccgcgtaatacgtaggggcgtagcgttgcggaatcactggcgtaaaggggttcgagg  
cggaaattcaagtcaggtgtaaaggcagtagcttaactactgtaagcatttgaactggatatttgagaagttagaggttaagtgga  
attttagttagcggtagaatgvcagatattaaaagaatacctgtggcgaagcgacttactggcacattctgacgctgaggaac  
gaaagcgtggtagcaaacaggattagataccctggtagtccacgctgtaaacgatgagtgtaggtattggcagaagttagtccg  
cagttaacacattaagcactccgcctggggagtacgtgcgca

>GM2GI8201A9C88

gccccggctaactacgtgccagcagccgcgtaatacgtaggggcagcgttgcggaattattggcgtaaagggtagctaggc  
ggcttttaagttgacgtgaaagccggggcttaactccggcaagcgttgaactggaaggttgagtgatggaagggacagtgg  
aattcctggttagtggtagaatgvcagagatcaggaagaataccagtggtgcaaggcgactgtctggacattaactgacgctgagg

tacgaaagcgtgggtagcaaacaggattagataccctgtagtccacgctgtaaacgatgagtgttaggtgtctgggatagactgggt  
gccatagctaacgcaataaacactccgctggggagtagcacgca

>GM2GI8201CG27W

ggatcggctaactccgtgccagcagccgcgtaatacggaggatccaagcgttatccggattattgggttaaaggggtcgttaggcg  
ggccctaagtcagtggtgaaagttgcagcttaactgaaaattgccattgaaactgagggctctgagtgaaataaggtaggcggaat  
gtgtgtgtagcggtgaaatgcttagatataacacagaacaccaattgcgaaggcagcttactgggatacaactgacgctgaggcac  
gaaagcgtgggatcaaacaggattagataccctgtagtccacgcagtaaacgatgaatactagctgtatcgatatactgtatgtg  
gcacagcgaagcgttaagtattccacctggggagtagcgttcgca

>GM2GI8201DBBQ1

gctccggctactccgtgccagcagccgcgtaatacggaggagctagcgttctcgaattactgggcgtaaagcgcacgtaggc  
ggcgactcaagtcagaggtgaaagcccgggctcaaccccgaactgcctttgaaactaggtgctagaatctggagaggtcagtg  
gaattccgagtagaggtgaaatcttagatattcgaagaacaccagtgggcgaaggcgactgactggacaagtattgacgctga  
ggtgcgaaagcgtggggagcaaacaggattagataccctgtagtccacgccgtaaacgatgataactagctgtccgggcacttgg  
tgctgggtggcgagctaacgcattaagtattccgctggggagtagcgttcgca

>GM2GI8201AYBUR

gccccggctaactacgtgccagcagccgcgtaatacgtagggcgagcgttctcgaattattgggcgtaaaggggtacgtaggc  
ggactgaaagttgacgtgaaagcccgggctcaaccccggcgagcgttaaaaactcaggccttgagtgtagaagggatcgtgg  
aattcctagtgtagcgtgaaatgcgtagagattaggaagaataccagtgggcgaagcgcacgatctggataccaactgacgctgag  
gtacgaaagcgtggggagcaaacaggattagataccctgtagtccacgccgtaaacgatgagtgttagatgtcgggtgtcaaagc  
tcggtatcggcttaacacattaagcactccgctggggagtagcgttcgca

>GM2GI8201BUH5D

gtctcggctaactacgtgccagcagccgcgtaaacgtaggagggcgagcgttatccggattcactgggcgtaaagcgtgtgcagg  
cgttcggttaagttggcgtaaatctcccggcttaactgggagaggtcgtcaataactaccggacttgagagcagtagaggaaggtg  
gaattcccgggtgtagtggtgaaatgcgtagatcgggaggaacaccagtgggcgaaggcgatcttctggactgttctgacgctcatac  
acgaaagctagggtagtaaacgggattagagaccccggtaactctagctgtaaacgatgtcaactggcgtcgggtggttaaacact  
atcgtgcccgaagcaaacgcgataagttgaccgctggggactacgatcga

>GM2GI8201C2S5S

gccccggctaactacgtgccagcagccgcgtaatacgtagggggcgagcgttatccggattcattgggcgtaaagcgtcgttagg  
cggcctgtaaggtcgggagttaaaggcggaggctaacctccgatgctcccataccggcaggcttgagtttggtatgggaaggcg  
gaattcccgggtgtagcgggtgaaatgcgtagatcgggaagaacaccggtggcgaaggcgccttctgggccataactgacgctga  
ggagcgaagctgggggagcgaacaggattagataccctgtagtcccagccgtaaacgatggacactaggtgtggggggatcat  
cctccgtgccgcagccaacgcattaagttcccgcctggggagtagcggccgca

>GM2GI8201A1KK0

gccacggctaactacgtgccagcagccgcgtaatacgtaggtggcgagcgttctcggatttactgggcgtaaaggatgcgtaggt  
ggaaacttaagtgggatgtgaaatccctgggctcaaccaggaactgcattccaaactgggtatctagagtgaggagaggaaagc  
ggaattcctagtgtagcgtgaaatgcgtagatattaggaagaacatcagtgggcgaaggcggcttctggactgtaactgacactgag

gcatgaaagcgtggggagcaaacaggattagataccctggtagtccacgccgtaaacgatgggtactaggtgtagggggatcaac  
tccccctgtgccgtcctaacgcagtaagtacccccgctggggagtagcggctgca

>GM2GI8201D0LPC

gcccggctaactacgtgccagcagccgcggaatacgtagggcgcaagcgtgtccggaattattggcgtaaagagctttaggt  
ggcttgcgcgtctgccgtgaaatccccgggcttaaccctggcggtgcggtgggtacgggcaggctagagtggttaggggagactg  
gaactcctggttagcggtggaatgcgagatatcaggaagaacaccgatggcgaaggcaggctctggccattactgacactga  
gaagcgaagcatggggagcgaacaggattagataccctggtagtccatgccgtaaacggtgggcactagatgtagggggacattcc  
acgtttccgctcgtagctaacgcattaagtccccgctggggagtagcggccgca

>GM2GI8201BM975

gccccggctaactacgtgccagcagccgcggaatacgtagggggcgagcgtgtccggaattattggcgtaaagagtagctagg  
cggtagataagtaggagtaaaaggcaccggctcaaccggcgtaagcttttaaaactgtcatacttgagacattgaggggaaagt  
gaattctagtagcggtgaaatgcgagatattaggaagaataccagagggcgaagcgaacttctagcgtatctgacgctgag  
gtacgaaagcgtgggaagcaaacaggattagataccctggtagtccacgccgtaaacgatgagtgttagatgtaggggtaaactg  
ggtgtcacaagccaacgcgataaaactccgctggggagtagcgtacgca

>GM2GI8201ESY6A

gcaccggctaactacgtgccagcagccgcggaatacgtaggggtgagcgtgtccggaattattggcgtaaagggtcgtaggg  
ggtcgattgctcggaagtggaaacctgcccgttaaccgtggcggttccgatacgggtgacttgaggaaggtaggggagaatg  
gaattcctggtggagcggtggaatgcgagatatcaggaagaataccagtggcgaaggcgacttctggacattaactgacgctga  
ggtacgaaagcgtggggagcaaacaggatcagataccctggtagtccacgctgtaaacgatgagtgaaggtgtgggggtcaaa  
cctcgggtgccgcttaacacagtaagcactccgctggggagtagcgtacgca

>GM2GI8201C2SJP

gtctcggctaactacgtgccagcagccgcgtaaacgtaggaggcaagcgttatccggattactggcgtaaagcgcgtgcagg  
cgggtcggttaagttggcggtgaaatctcccggctcaactgggagaggtcgctcaatactaccgtacttgagagcagaagaggaaa  
tggaattcccgggtgtagtggtgaaatgcttagatatcgggaggaacaccagtggcgaaggcgattttctggtctgtttctgacgctcaga  
cgcgacagtagggtagtaaacgggattagagaccccggtaacctagccgtaaacgatgtgaacttggcggttggtgggttaaactc  
catcagtgccgtagcaaacgcgataagttaccgctggggactacggccgca

>GM2GI8201C2PS6

gcctcggctaactacgtgccagcagccgcgtaaacgtaggaggcgagcgttatccggattactgggtgtaaagcgcgtgcagg  
cggttggctaagttgggtgtgaaagctcctggctcaactgggagaggtcgctcaagactggccgactggagagcaggatgggaagg  
tggaattcccgggtgtagtggtgaaatgcttagatatcgggaggaacaccagtggcgaagcggccttctggactgcatctgacgctc  
agacgcgaaagctaggggagcaaacgggattagagaccccggtagtctagctgtaaacgatgtgaacttggcgcggggtgggta  
aaaccgttccgtgccggagcaaacgcgataagttaccacctgaggactacggccgca

>GM2GI8201CQN9D

gccccggctaactacgtgccagcagccgcggaatacgtagggggcgagcgtgtccggaattattggcgtaaagggttcgcaggc  
ggcctttaagttagatgtgaaagatcacggctcaaccgtggaagcattgaaactggaaggcttgagtaaggagaggaaagtgg  
aattcctagtagcggtgaaatgcttagatattaggaggaataccagtggcgaaggcgacttctggacttatactgacgctgagga

acgaaagcgtggggagcaaacaggattagataccctgtagtccacgccgtaaacgatgagtgctaggtgctgggggtcaaacct  
cggtgccggagctaacgcattaagcactccgctggggagtacgtacgca

>GM2GI8201C1MIW

gtctcggctaactacgtgccagcagccgcggtaaaacgtaggagggcagcgttatccggattcactgggcgtaaagcgcgtgcagg  
tggcttgtaagttaggcgtgaaatctcccggctcaactgggagaggtcgtctaatactaccgggcttgagagcagaagaggaagat  
ggaattcccgggtgtagtggtgaaatgctgtagatatacgggaggaacaccagtgccgaaggcgatcttctggtctgttctgacactcaga  
cgcgacagctagggtagtaaacgggattagagaccccggtaatcctagccgtaaacgatgtaaactggcgttggtgggttaaactc  
catcagtgccgcagcaaacgcgataagttaccgctggggactacggccgca

>GM2GI8201AQAFO

gcctcggctaactacgtgccagcagccgcggtaaaacgtaggagggcagcgttatccggattcactgggtgtaaagcgcgtgcagg  
cggctgttaagttggatgtgaaagctcccggctcacctgggagaggtcgttaagactggcagactggagagcagtaggggaaggt  
ggaattcccgggtgtagtggtgaaatgctgtagatatacgggaggaacaccagtgccgaaggcggcctctggactgcatctgacgctca  
gacgcgaaagctaggggagcaaacgggattagagaccccggtagcttagccgtaaacgatgtgaactggcgcgggtgggtaa  
aacgatcggtgccgaagcaaacgcgataagttaccacctggggactacggccgca

>GM2GI8201B5EZ7

gcaccggctaactacgtgccagcagccgcggtaaacgtagggtgcaagcgttaacggaattactgggcgtaaagcgtgcgcagg  
cggttttgtaagacagtggtgaaatccccgggctcaacctgggaactgccattgtgactgcaaggctggagtgcggcagagggggat  
ggaattcccgcgtgtagcagtgaaatgctgtagatatacgggaggaacaccgatggcgaaggcaatcccctgggctgcactgacgctc  
atgacgaaagcgtggggagcaaacaggattagataccctgtagtccacgccctaaacgatgtcaactggttggtgggaatttattt  
ctcagtaacgaagctaacgcgtgaagtgaccgctggggagtacggccgca

>GM2GI8201CSLGU

gccccggctaactcgtgccagcagccgcggtaaacagaggggtagcgttgctcggaaactcactgggcgtaaaggggtgcgtagg  
cgggtcttaagtcaggggtgaaatcctggagctcaactccagaactgccttgatactgaagatcttgagtccgggagaggtgagtgg  
aactgcgagtgtagaggtgaaatcgttagatatacgaagaacaccagtgccgaaggcggctcactggccccgtactgacgctgag  
gcacgaaagcgtggggagcaaacaggattagataccctgtagtccacgccgtaaacgatgaatgccagccgttagtgggttactc  
actagtggcgcagctaacgcgttaagcattccgctggggagtacggctcga

>GM2GI8201A0WUV

gcaccggctaactcgtgccagcagccgcggtaaacagaggggtgcgagcgttggtcggaaattattgggcgtaaagcgcgtgtagg  
cggccttgcaagttgggtgtgaaagccctcggcttaaccgaggaagtgcgccaaaactacgaggcttgagtccgggagaggggtgg  
cggaaattcccgggtgtagaggtgaaatcgttagatatacgggaggaacaccagtgccgaaggcggccacctggacggtaactgacgc  
tgagacgcgaaagcgtggggagcaaacaggattagataccctgtagtccacgcgtgtaaacgatgagcgcgtaggtggtggtggtt  
gacccccgcagtgccgcagctaacgcattaagcgtccgctgggaagtacggccgca

>GM2GI8201CQZUZ

ggtccggctaattacgtgccagcagccgcggtaaacgtaaggaccgagcccggttgcggaaactcattgggcgtaaaggggtacgtag  
gctgtaattaagttaggagtgaaaagccatagctcaactatagtaagcttttaaactgattagcttgagtaattgaagggttaagtgga  
attcctagtgtagcgggtgaaatgctgagatattaggaagaataccagtgccgaaagcgcacttactggcaattaactgacgctgaggtg

cgaaagcgtggtagcaaacaggattagataccctggtagtcacgcccgtaaacgatgagtgtagatgccgaggtaaactgggt  
gtcacaagccaacgcgataaacactccgctggggagtagctacgca

>GM2GI8201CTFSO

ggatcggctaactccgtgccagcagccgcgtaatacaggatccgagcgttatccggattattgggttaaagggtgctcagccg  
gatgtaagtcggcgggtgaaatfttcagctcaactgtaaaagtgccttcgatactggcttctgagtggtggaagtaggagggaattg  
tggtgtagcggtgaaatgcttagatatacagaggaactccgattgctcagcagcagctactaaaccactactgacgctcatgcacgaag  
gcgtgggatcaaacaggattagataccctggtagtcacgagtaaacgatgattactagttggttcgatacaatgtaagcactga  
gcgaaagcgttaagtaatccacctggggagtagcttcgca

>GM2GI8201C65H1

gccctggctaatacgtgccagcagccgcgtaatacgtatggggcaagcgttgcggaattattgggcgtaagggtatgtaggcg  
gttaattaagtctgaattaaaggctgtggctcaaccacgggttcggttagaaactggtaactgagtagaggggaaagtggaattc  
catgtgtagcggtgaaatgcttagatatacagaggaacaccagtgggcaaggcagcttctagaatctaactgacgctgagatacga  
aggcgtggtagcaaacaggattagataccctggtagtcacgagtaaacgatgagtgctagttggtgggagtaaatctcagtgac  
gcagctaacgcattaagcactccgctggggagtagcttcgca

>GM2GI8201DFG41

gccacggctaactacgtgccagcagccgcgtaatacgtaggtggcaagcgttgcggaattattgggcgtaaggagcgcagggc  
ggtgacttaagtctgatgtgaaagcccacggctcaaccgtggaaggctattggaaactgggtcacttgagtacagaagaggaaagc  
ggaattccatgtgtagcggtgaaatgcttagatatacagaggaacaccagtgggcaaggcggcttctggtctgtgactgacgctgag  
gctcgaagcgtggggagcaaacaggattagataccctggtagtcacgcccgtaaacgatgagtgctaagtgtggagggttccac  
cctcagtgctggagtaacgcattaagcactccgctggggagtagcttcgca

>GM2GI8201BDQBQ

gccccggctaactacgtgccagcagccgcgtaatacgtagggggcgaagcgttatccggattcattgggcgtaaggagcgcgtagg  
cggctgttaagcgagatgtgaaatccggggctcaaccgcggttgcactcgaactggcaggcttgagtctggtagaggagtgtg  
gaattcccagtgtagcggtgaaatgctcagatattgggaggaacaccagtgggcaaggcggcactctgggccacgactgacgctg  
aggcgcgaaagctaggggagcgaacaggattagataccctggtagtcctagccgtaaacgatgggcactaggtgtgggggtttac  
ccctccgtgccgagctaacgcattaagtccccgcctggggagtagcggccgca

>GM2GI8201AVIOF

gccccggctaactacgtgccagcagccgcgtaatacgtagggggcgaagcgttgcggaattattgggcgtaagggttcgtaggc  
ggtttttaagtcagatgtgaaaggcgcaggctcaacctgtgtaagcattgaaactgaaagacttgagtaaggagaggaaagtgga  
attcctagtgtagcggtgaaatgcttagatattaggaggaataccagtggcgaaggcagcttctggacttatactgacgctgaggaac  
gaaagcgtggggagcaaacaggattagataccctggtagtcacgcccgtaaacgatgagtgctaggtgtgggggtcaaacctcgg  
tgccgagctaacgcattaagcactccgctggggagtagcttcgca

>GM2GI8201AQQ3K

gcaccggctaactacgtgccagcagccgcgtaatacgtaggggtgcgagcgttgcggaattattgggcgtaagggtcgttaggc  
ggtcgattgcgtcggaaagtggaaacctgcccgttaaccgtggcgcttccgatacgggtgacttgaggaaggtaggggagaatg  
gaattcctggtggagcgggtgaaatgctcagatatacaggaggaacaccagtgggcaaggcgggttctctggaccttctgacgctgag

gagcgaaagcgtgggaagcaaacaggattagataccctgtagtccacgccgtaaacgatgagtgtagatgtccgaggtaaact  
gggtgcacaagccaacgcgataaacactccgctggggagtagctacgca

>GM2GI8201B4HDO

gcaccggccaactacgtgccagcagccgcggaataacgtaggggtgcaagcgtgtccggaattattggcgtaaagagctcgtagg  
cggtttgtgctgctgtaaactcccgaggctcaacctcgggtctgcagtcgatacagcaaacactagagtgtaggggagactg  
gaattcctggtgtagcgggtgaaatgcgagatatacaggaggaacaccggtggcgaaggcgggtctctgggcaacaactgacgctg  
aggagcgaaagcgtggggagcgaacaggattagataccctgtagtccacgccgtaaacgttggcgctaggtgtggggctcattc  
cacgagttccgtgccgagctaacgcattaagcgcctggggagtagcggccgca

>GM2GI8201BM73V

gcaccggctaactacgtgccagcagccgcggaataacgtaggggtgcgagcgtgtccggaattattggcgtaaagagctttaggc  
ggtttgcgctgctgtgaaaactccgggggctcaaccccgacttgcagtggttacgggcagactagagtggttaggggagact  
ggaattcctggtgtagcgggtgaaatgcgagatatacaggaggaacaccgatggcgaaggcaggtctctgggccactactgacgctg  
agaagcgaaagcatggggagcgaacaggattagataccctgtagtccatgccgtaaacgttggcgctaggtgtggggctcattc  
cacgagttccgtgccgagctaacgcattaagcgcctggggagtagcggccgca

>GM2GI8201DOW77

gcaccggctaactccgtgccagcagccgcggaataacgtaggggtgcaagcgttatccggattcactgggttaaagggtgcgtagga  
gggcaggtaagtcagtggtgaaatctccaagcttaacttggaaactgccgttgatactatctgttgaataccgtggaggtgagcgga  
atatgtcatgtagcgggtgaaatgcttagatatacagaacaccaattgccaaggcagctcgtacacgaatattgactctgaggca  
cgaaagcgtgggatcaaacaggattagataccctgtagtccacgccctaaacgatggatactgcacatacgcgatacacagtg  
gtgtctgagcgaagcattaagtatcccacctgggaagtagcaccgca

>GM2GI8201CLUE0

ccggctaattacgtgccagcagccgcggaataacgtaaggaccgagcgtgtccggaatcattggcgtaaagggtacgtaggcg  
ctaattaagtaggagtgaaaagccatagctcaactatagtaagctttaaaactgattagcttgagtaattgaagggttaagtgaattcc  
tagttagcgggtgaaatgcgagatattaggaagaataccagtgggcgaagcgcacttactggcaattaactgacgctgaggtagca  
aagcgtggtagcaaacaggattagataccctgtagtccacgctgtaaacgatgagtgtaggtgtctgggagaacctgggtgcca  
cagcaaacgcaataaacactccgctggggagtagcacgca

>GM2GI8201BHXTD

ggtccggctaattacgtgccagcagccgcggaataacgtaaggaccgagcgtgtccggaatcattggcgtaaagggtacgtaggc  
ggctaattaagtaggagtgaaaagccatagctcaactatagtaagctttaaaactgattagcttgagtaattgaagggttaagtga  
attcctagtgtagcgggtgaaatgcgagatattaggaagaataccagtgggcgaagcgcacttactggcaattaactgacgctgaggta  
cgaaagcgtggtagcaaacaggattagataccctgtagtccacgctgtaaacgatgagtgtaggtgtctgggggcaaacctcg  
gtgcccggttaacacagtaagcactccgctggggagtagctacgca

>GM2GI8201EONFA

ggtccggctaattacgtgccagcagccgcggaataacgtaaggaccgagcgtgtccggaatcattggcgtaaagggtacgtaggc  
ggcttttaagttgacgtgaaagcccgggcttaactccggcgagcgtgaaaactggaaggcttgagtgatggaaggacagtg  
aattcctggtgtagcgggtgaaatgcgagatattaggaagaataccagtgggcgaagcgcacttactggcaattaactgacgctgagg

acgaaagcgtgggtagcaaacaggattagataccctggtagtccacgctgtaaacgatgagtgtaggtgtctgggagaacctgggt  
gccacagcaaacgcaataaacactccgctggggagtagcacgca

>GM2GI8201B1KG5

gcgccggccaactacgtgccagcagccgcggaatacagtagggcgagcgtgtccggatttattgggcgtaaagagctcgtagg  
cggctgtcgcgtcgaccgtgaaaactggggctcaacccaagcctgcggtcgatacgggcaggctagagttcggtaggggagac  
tggattcctggttagcgggtgaaatgcgagatcaggaggaacaccggtggcgaaggcgggtctctgggccgatactgacgct  
gaggagcgaagcgtggggagcgaacaggattagataccctggtagtccacgctgtaaacggtggcgctaggtggtgggggct  
ctccggttctctgtgccgagctaacgcattaagcgccccgctggggagtagcggccgca

>GM2GI8201A15XN

gcaccggctaactctgtgccagcagccgcggaatacagaggggtgcgagcgttaacggttactgggcgtaaagcgtcgtaggc  
ggcttttaagtcggatgtgaaatccccgagcttaactgggaattgcattcgatactgggaagctagagtatgggagaggatggtaga  
attccaggttagcgggtgaaatgcgtagagatctggaggaataccgatggcgaaggcagccatctggcctaatactgacgctgaggt  
acgaaagcatggggagcaaacaggattagataccctggtagtccatgccgtaaacgatgtctactagccgttggggccttgaggctt  
tagtggcgagctaacgcgataagtagaccgctggggagtagcggctcgca

>GM2GI8201DQCBN

gcaccggctaactacgtgccagcagccgcggaatacagtaggggtgcaagcgtgtccggaattattgggcgtaaagagctcgtaggc  
ggtctgtcgcgtctgtgtgaaaactcggggcttaactccgggctgcagtgggtacgggcagactagagtgcggtaggggagactg  
gaattcctggttagcgggtgaaatgcgagatcaggaggaacaccggtggcgaaggcgggtctctgggccgtaactgacgctga  
ggagcgaagcatggggagcgaacaggattagataccctggtagtccatgccgtaaacggtggcgctaggtggtggggcttgttcc  
acgagttccgtgccgagctaacgcattaagcgccccgctggggagtagcggccgca

>GM2GI8201CUYIZ

ggtccggctaattacgtgccagcagccgcggaatacagtaaggaccgagcgtgtccggaatcattgggcgtaaagagtagcgtaggc  
ggtaagataagttaggagtaaaaggcaccggctcaaccggcgaagctttaaaactgttacttgagacattgaggggaaagtgga  
atttctagttagcgggtgaaatgcgagatattaggaagaataccagagggcgaagcgaacttctagcgtatctgacgctgaggtg  
cgaagcgtgggaagcaaacaggattagataccctggtagtccacgcccgaacgatgaatactaggtgtagggggatcgaccc  
cccctgtgccggcctaacacaataagtattccgctgggaattacgatcgca

>GM2GI8201DWP96

gcgccggctaactacgtgccagcagccgcggaatacagtagggcgcaagcgtgtccggaattattgggcgtaaagagctcgtagg  
cggttgtcgcgtctgtgtgaaaacctcaggctcaacctggggctgcagtgggtacgggcagactagagtgcggtaggggtgactg  
gaattcctggttagcgggtgaaatgcgagatcaggaggaacaccgatggcgaaggcaggtcactgggccgcaactgacgctg  
aggagcgaagcatggggagcgaacaggattagataccctggtagtccatgccgtaaacggtggcactaggtggtggggctcattc  
cacggttccgtgccgagcaaacgcattaagtccccgctggggagtagcggccgca

>GM2GI8201BWU56

gccccggctaactacgtgccagcagccgcggaatacagtagggggcgagcgtgtccggaattattgggcgtaaagggtagcgtagg  
cggactgaaagttgacgtgaaagccccggggcttaacccccgagcgttaaaaactcaggccttagtggtagaagggatcgtg  
gaattcctagttagcgggtgaaatgcgtagagattaggaagaataccagtgggcgaagcgaacgatctggataccaactgacgctga

ggtacgaaagcgtggggagcaaacaggccttagataccctggtagtccacgctgtaaacgggtgggtactaggtgtgggatccattcca  
cggattctgtgccgtagctaacgcattaagtacccccgctggggagtacggccgca

>GM2GI8201APIV4

gcaccggctaactacgtgccagcagccgcggaatacgtaggggtgcaagcgttaacggaattactgggcgtaaagcgtgcgagg  
cggttgtgcaagacagatgtgaaatccccgggctaacctgggaattgcatftgtgactgcacggctagagtggtcagaggggggta  
gaattccacgtgtagcagtgaaatgcgtagatatgtggaggaataccgatggcgaaggcagccccctgggataaactgacgctca  
tgcacgaaagcgtggggagcaaacaggattagataccctggtagtccacgcccataacgatgtctactagttgtcgggtcttaattgac  
ttgtaacgcagctaacgcgtgaagtagaccgctggggagtacggctgca

>GM2GI8201DNRN3

ggtccggctaattacgtgccagcagccgcggaatacgtaggaccgagcgttgcggaatcattgggcgtaaagagtacgtaggc  
ggtaagataagttagaagtaaaaggcaccggctcaaccggcgtaacttttaaaactgttttacttgagacattgagggggaagtggaa  
tttctagttagcggtgaaatgcgtagatattaggaagaataccagaggcgaaagcgactttctagcagatgatctgacgctgaggtac  
gaaagcgtgggaagcaaacaggattagataccctggtagtccacgcccgaacgatgagtgtagatgtccgaggtaaactgggtg  
tcggaagccaacgcgataaactccgcctggggagtacgcacgca

>GM2GI8201BT66X

ggtccggctaattacgtgccagcagccgcggaatacgtaggaccgagcgttgcggaatcattgggcgtaaagggtagctaggc  
ggctaattaagttaggagtgaaaagccatagctcaactatagtaagcttttaaaactgattagcttgagtaattgaagggtaaagtggaa  
tctagttagcggtgaaatgcgtagatattaggaagaataccagtgccgaaggcgactgtctggacattaactgacgctgaggtac  
gaaagcgtggggagcaaacaggatcagataccctggtagtccacgcccgaacgatgagtgtagatgtccgaggtaaactgggtg  
gtcgggaagccaacgcgataaactccgcctggggagtacgcacgca

>GM2GI8201C0X1Y

gccccggctaactacgtgccagcagccgcggaatacgtagggggcgagcgttgcggaattattgggcgtaaagagcgtgtagg  
cggttcggtaagtctgccgtgaaaacctggggctcaaccggcggtgagctgactgccgggctagaggggtgtagagggcgag  
tggaaatcccgggtgtagcggtgaaatgcgtagatattcgggaggaacaccagtagcgaaggcggctcgtgggccattcctgacgct  
gagacgcgaaagctaggggagcgaacaggattagataccctggtagtccagcggtaaacgatgaactaggtgtggggggaggt  
cgaatccctctgtgccgagccaacgcgttaagtgtccgctggggagtacggccgca

>GM2GI8201C3BVK

gccccggctaactacgtgccagcagccgcggaatacgtagggggcgagcgttgcggaattattgggcgtaaagggtagctagg  
cggactgaaagttgacgtgaaagcccggggctaacccggcgagcgttaaaaactacaggcctgagtgtagaagggatcgt  
ggaattcctagttagcggtgaaatgcgtagagattaggaagaataccagtgggcgaagcgacgatctggataccaactgacgctg  
aggtacgaaagcgtggggagcaaacaggattagataccctggtagtccacgcccgaacgatgagtgtagatgtcgggtgtcaaa  
cctcgggtgccggcttaacacagtaagcactccgcctggggagtacgtacgca

>GM2GI8201AP9NL

gcaccggctaactcgtgccagcagccgcggaatacgaagggtgcaagcgttaacggaattactgggcgtaaagcgcgctagg  
tggttcgttaagtggatgtgaaagccccgggctaacctgggaactgcatccaaaactggcgagctagagtatggcagaggggtgtg  
ggaatttcctgtgtagcggtgaaatgcgtagatattaggaaggaacaccagtgggcgaaggcgaccacctgggctaatactgacactg



agggtcgcgaaagcgtggggagcaaacaggattagataccctggtagtccacgccgtaaacgatgtcgactagccgttgggatccttg  
agatcttagtggcgcagctaacgcattaagtcgaccgctggggagtagcggccgca

>GM2GI8201DAY5C

gcaccggctaactacgtgccagcagccgcggaatacgtagggtgcaagcgtaatcggaattactgggcgtaaacggtgcgcagg  
cggttttgtaagtctgtcgtgaaatccccgggctaacctgggaatggcgatggagactgcaaggctagagttggcagaggggggta  
gaattccacgttagcagtgaaatgctgagatgtggaggaacaccgatggcgaaggcagccccctgggtcaagactgacgctc  
atgcacgaaagcgtggggagcaaacaggattagataccctggtagtccacgccctaaacgatgtctactagttgttgggtcttaattga  
cttagtaacgcagctaacgcgtgaagtagaccgctggggagtagcggtcgca

>GM2GI8201EE559

gtatcggctaactccgtgccagcagccgcggaatacggaggatacagcgttatccggatttattgggttaaaaggggtgcgcaggcg  
gtctgtcaagtcaggggtgaaaagccgaggtcaacctgtcttgccttgaaactggtggactggagagtagatgtggtggcgga  
atgcgtagtgtagcggtgaaatgcatagatattacgcagaactccgattgcgaaggcagctcaciaaagtatactgacgctgaggc  
acgaaagcgtgggtatcgaacaggattagataccctggtagtccacgccgtaaacgatgagtgtagatgtcgggtgtcaaagctcg  
gtatcgccttaacacattaagcactccgctggggagtagcgtacgca

>GM2GI8201CQG7G

gccccggctaactacgtgccagcagccgcggaatacgtagggggcgagcgttgcggaattattgggcgtaaacgggtacgtagg  
cggacttgaaagttgacgtgaaagccccgggctaacccccggcgagcgttaaaaactacaggccttgagtgttagaagggatcgt  
ggaattcctagtgtagcggtgaaatgctgtagagattaggaagaataccagtgggcgaagcagcagctcggataccaactgacgctg  
aggtagcgaagcgtggggagcaaacaggattagataccctggtagtccacgccgtaaacgatgaatactaggtgtagggggtatcg  
acccccctgtgccggcgctaacacaataagtattccgctgggaattacgatcgcga

>GM2GI8201C2IQE

gccccggctaactacgtgccagcagccgcggaatacgtagggggcgagcgttgcggaattattgggcgtaaacgggctgtag  
gcggtcttcaagtcggaagtgaaaattcatggctcaactgtgaactgcttacgaaactggaggacttgagtactagaggggaaggc  
ggaattcctagtgtagcggtgaaatgctgtagagattaggaagaacaccgggtggcgaaggcggccttctggctagcaactgacgctg  
aggcgcgaaagcgtggggagcaaacaggattagataccctggtagtccacgcagtaaacgatgaatacttgatgtaggaggtatcg  
accccttctgtgcaagftaacgtattaagtattccacctggggagtagcaccgca

>GM2GI8201BJNPC

ggtccggctaattacgtgccagcagccgcggaatacgtagggggcgagcgttgcggaattattgggttaaaaggggtgcgcaggcg  
gtctgtcaagtcaggggtgaaaagccgaggtcaacctgttgccttgaaactggtggactggagagtagatgtggtggcgga  
atgcgtagtgtagcggtgaaatgcatagatattacgcagaactccgattgcgaaggcagctcaciaaagtatactgacgctgaggc  
acgaaagcgtgggtatcgaacaggattagataccctggtagtccacgccgtaaacgatgattactcgaagtagcgtatgacagtag  
gctccaagcgaagtgataagtaatccacctgggaagtagcggcgca

>GM2GI8201E5DTE

gccccggctaactacgtgccagcagccgcggaatacgtagggggcgagcgttgcggaattattgggcgtaaacgggtacgtagg  
cggtaagataagtagaagtaaaaggcaccggctcaaccggcgtaagcttttaaaactgtttacttgagacattgagggggaagtg  
aatttctagtgtagcggtgaaatgctgagatattaggaagaataccagaggcgaagcagcttctagcagtagatctgacgctgagg

acgaaagcgtgggaagcaaacaggattagataccctgtagtccacgccgtaaacgatgagtgcaaggtgttgggggtcaaacc  
cggtgccgccgtaaacacagtaagcactccgcctggggagtagctacgca

>GM2GI8201CRBCE

gccacggcctaactacgtgccagcagccgcgtaatacgtaggtggcgagcgttatccggattactgggtgtaaagggcgttagg  
cggctttcaagtcggaagtgaaaattcatggctcaactgtgaactgcttacgaaactggaggacttgagtactagaggggaaggcg  
gaattcctagtgtagcggtaaaatgcgtagagattaggaagaacaccgggtggcgaaggcggccttctggctagcaactgacgctga  
ggcgcgaaagcgtggggagcaaacaggattagataccctgtagtccacgcagtaaacgatgaatactgtatgtaggaggtatcga  
ccccttctgtgcgaagtaacgtattaagtattccacctggggagtagcggca

>GM2GI8201DASMD

ggatcggctaactccgtgccagcagccgcgtaatacggaggatccgagcgttatccggattattgggttaaagggagcgttagtg  
gaagattaagtcagttgtgaaagttgcggtcaaccgtaaaattgcagttgatactggtttcttgagtgacgtagaggtgggcggaattc  
gtggtgtagcggtgaaatgcttagatcacgaagaactccgattgcaaggcagctcactggactgtaactgacactgatgctcgaa  
agtgtgggtataaacaggattagataccctgtagtccacacagtaaacgatgaatactcgtgttgcgatacagtaagcggcc  
aagcgaagcgttaagtattccacctggggagtagcggca

>GM2GI8201A8RTD

gccacggctaactacgtgccagcagccgcgtaatacgtaggtggcgagcgttgcgggaattattgggcgtaaagagcatgtaggc  
ggtttcttaagctgagtgaaaatgcggggctcaaccctgatggctctggatactgggagacttgagtgacaggagaggaaagggg  
aattcccagtgtagcggtgaaatgcgtagatattgggaggaacaccagtgccgaaggcgccttctggactgtgtctgacgctgagat  
gcgaaagccagggtagcgaacgggattagataccctgtagtccctggcgttaaacgatgggtactaggtgtaggaggtatcgacc  
cctcctgtgccggagtaacgcaataagtaccccgctggggagtagcggca

>GM2GI8201EDE2F

gccccggctaactacgtgccagcagccgcgtaatacgtagggcgagcgttgcgggaattattgggcgtaaagggtagctaggg  
cggcttttaagttgacgtgaaagcccggggcttaactccggcaagcgttgaaaactggaaggcttgagtgatggaagggacagtgg  
aattcctggtgtagtggtgaaatgcgcagagatcaggaagaataaccagtgccgaaggcgcactgtctggacattaactgacgctgagg  
tacgaaagcgtggggagcaaacaggatcagataccctgtagtccacgcgtgtaaacgatgagtgcaaggtgttgggggtcaaacc  
ccggtgccgccgtaaacacagtaagcactccgcctggggagtagcggca

>GM2GI8201B561P

gccccggctaactacgtgccagcagccgcgtaatacgtagggcgagcgttgcgggaattattgggcgtaaagggtagctagggc  
gcttttaagttgacgtgaaagcccggggcttaactccggcaagcgttgaaaactggaggccttgagtgatggaagggacagtgga  
attcctggtgtagtggtgaaatgcgcagagatcaggaagaataaccagtgccgaaggcgcactgtctggacattaactgacgctgagg  
acgaaagcgtggggagcaaacaggattagataccctgtagtccacgccgtaaacgatgagtgtagatgtccaggttaaactgg  
gtgtcggaaagccaacgcgataaaactccgcctggggagtagcggca

>GM2GI8201BK1FF

gccacggctaactacgtgccagcagccgcgtaatacgtaggtggcgagcgttatccggagttactgggtgtaaagggcgttagg  
cggctttcaagtcggaagtgaaaattcatggctcaactgtgaactgcttacgaaactggaggacttgagtactagaggggaaggcg  
gaattcctagtgtagcggtaaaatgcgtagagattaggaagaacaccgggtggcgaaggcggccttctggctagcaactgacgctga

ggcgcgaaagcgtggggagcaaacaggattagataccctggtagtcacgcagtaaacgatgaatactgggtgtaggaggtatcga  
ctccttctgtgccgaaacgaacgcattaagtattccacctggggagtagcatcgca

>GM2GI8201A1KNX

ggtccggctaattacgtgccagcagccgcgtaatacgttaaggaccgagcgttgcggaatcattgggcgtaaagggtacgtaggc  
ggctaattaagtaggagtgaaaagccatagctcaactatagtaagctttaaaactgattagcttgagtaattgaagggttaagtggaat  
tcctagtgtagcggtgaaatgcgagatattaggaagaataaccagtggcgaaggcgactgtctggacattaactgacgctgaggtac  
gaaagcgtggggagcaaacaggattagataccctggtagtcacgcgtgtaaacgatgagtgtaggtgtctgggatagactgggtgc  
catagctaacgcaataaacactccgctggggagtagcgacgca

>GM2GI8201CSN0Z

ggtccggctaattacgtgccagcagccgcgtaatacgttaaggaccgagcgttgcggaatcattgggcgtaaagagtagctaggc  
ggtaagataagttagaagtaaaaggcaccggctcaaccggcgtaagctttaaaactgtttacttgagacattgagggggaagtgga  
atttctagtgtagcggtgaaatgcgtagagatcaggaagaacaccgggtggcgaaggcgacttctggacgacaactgacgctgagg  
cgcgaaagcgtggggagcaaacaggattagataccctggtagtcacgcgtaaacgatgaatactaggtgtagggggtatcgac  
ccccctgtgccgcgctaacacaataagtattccgctgggaattacgatcgca

>GM2GI8201ETZ1A

gccccggctaactacgtgccagcagccgcgtaatacgttagggggcgagcgttgcggaattattgggcgtaaagggtacgtagg  
cggacttgaaagttgacgtgaaagccccggggcttaacccggcgagcgttaaaaactacaggccttgagtggtagaagggtatcgt  
ggaattcctagtgtagcggtgaaatgcgtagagattaggaagaacaccgggtggcgaaggcgcttctggctagcaactgacgctg  
aggcgcgaaagcgtggggagcaaacaggattagataccctggtagtcacgcagtaaacgatgaatacttgatgtaggaggtatcg  
acccttctgtgcaagttaacgtattaagtattccacctggggagtagcaccgca

>GM2GI8201DBLPC

gccccgctaactacgtgccagcagccgcgtaatacgttagggggcgagcgttgcggaattattgggcgtaaagggtacgtaggc  
ggctaattaagtaggagtgaaaagccatagctcaactatagtaagctttaaaactgattagcttgagtaattgaagggttaagtggaat  
tcctagtgtagcggtgaaatgcgagatattaggaagaataaccagtggcgaaggcgacttactggcaattaactgacgctgaggtac  
gaaagcgtggggagcaaacaggatcagataccctggtagtcacgcgtgtaaacgatgagtgcaagggttgggggtcaaacctg  
gtgcccggttaacacagtaagcactccgctggggagtagcgtacgca

>GM2GI8201D7WWN

gtatcggctaactccgtgccagcagccgcgtaatacggaggatacgcgcttaccggatttattgggtttaaagggtgcgagggc  
gtctgtcaagtcaggggtgaaaagccgaggctcaaccttggcttgccttgaaactggtggactggagagtagatgatgtgggcgga  
atcgtagttagcggtgaaatgcatagatattacgcagaactccgattgcgaaggcagctcaciaaagtatactgacgctgagggc  
acgaaagcgtgggtatcgaacaggatcagataccctggtagtcacgcgtgtaaacgatgagtgcaagggttgggggtcaaacctg  
ggtgcccggttaacacagtaagcactccgctggggagtagcgtacgca

>GM2GI8201D6EHD

gccccggctaactacgtgccagcagccgcgtaatacgttagggggcgagcgttgcggaatgattgggtgtaaagggtacgcagg  
cggctctattaagttggcgtgaaagccccggggcttagctccggttaagcgttgaaaactggtgacttgaatagtgaagagatagtg  
aattcctagtgtagcggtgaaatgcgtagagattaggaagaataccaatggcgaaagcaactatctggacacatattgacgctgagg

tacgaaagcgtggggagcaaacaggattagataccctggtagtcacgcagtaaacgatgaatacttgatgtaggaggtatcgacc  
ccttctgtgtcgaagtaacgtattaagattccacctggggagtagcaccgca

>GM2GI8201D1OT9

gcatcggctaattccgtgccagcagccgcggaatacgggaagatgcgagcgttatccggattattgggttaaagggagcgtaggcg  
ggatgtaagtcagcggtaaatgtcgatgcccaacatcgtaagccgttgatactgggtccttgaatgcacacaagggagatggaat  
tcgtcgttagcggtgaaatgcttagatatgacgaagaactccgattgcgaaggcagctcctgggggtgaattgacgctgaggctcga  
aagtgcgggtatcaaacaggattagataccctggtagtcgcacagtaaacgatgaatgctgggtttggcgatatacagtcaggaact  
gagggaaaccattaagcattccacctggggagtagcaccgca

>GM2GI8201ELV0M

gccacggctaactacgtgccagcagccgcggaatacgtagggtggcagcgttatccggaatcattgggcgtaagagggagcag  
gcgccattgcaggtctgcggtgaaagcccgaagctaaactcggtaagccgtggaaaccgcaaagctagagtcagtagaggatc  
gtggaattccatgtgtagcggtgaaatgcttagatatatggaggaacaccagtgggcgaaggcgacgatctgggctgtaactgacgct  
cagtcggaaagcgtggggagcaaataaggattagataccctagtagtcacgcggtaaacgatgagtagtaagtgtgggggtcaa  
acctcagtgctcagttaacgcaataagtagtccgctgagtagtacgttcgca

>GM2GI8201AQZMR

gtatcggctaactccgtgccagcagccgcggaatacggaggatacgcggttatccggattattgggttaaagggcgcgagggcg  
gtctgtcaagtcaggggtgaaagccgaggtcaacctggcttgccttgaaactggaggactggagagtagatgtggggcgga  
atgcgtagttagcggtgaaatgcatagatactacgcagaactccgattgcgaaggcagctcaciaaagtatactgacgctgaggc  
acgaaagcgtgggtatcgaacaggattagataccctggtagtcacgcggtaaacgatgagtgtagatgtaggagtaaacctgggt  
gtcggaaagccaacgcgataaacactccgctggggagtagcgcacgca

>GM2GI8201AVPXG

gccacggctaactacgtgccagcagccgcggaatacgtagggtggcagcgttatccggattactgggtgtaaagggcgtgtaggc  
ggtcttcaagtcggaagtgaaaattcatggctcaactgtgaactgcttacgaaactggaggactgagtagaggggaaggcgg  
aattcctagtgtagcggtaaatgcttagagattaggaagaacaccggtggcgaaggcggccttctggctagcaactgacgctgag  
gcgcgaaagcgtggggagcaaacaggattagataccctggtagtcacgcggtaaacgatgaatactaggtgtgggggttcaaca  
cctccgtgccggcctaacgcattaagtagtccgctggggagtagcggtcgca

>GM2GI8201D4MQN

gcgacggctaatacgtgccagcagccgcggaatacgtatgtcgaagcgttatccggattattgggcgtaaacgcgcttagggcg  
gtttgtaagtctgatgtgaaaatgcggggctcaactccgtattgcgttgaaactgcaaactagagtaggagaggtaggcggaa  
ctacaagttagaggtgaaattcgtagatattgttaggaatgccgatggggaagccagcctactggacagatactgacgctaaagcg  
cgaagcgtggtagcaaacaggattagataccctggtagtcacgcggtaaacgatgattactaggtgtgggggtcgaacctcag  
cgccaagctaacgcgataagtaatccgctggggagtagcgcacgca

>GM2GI8201BBDD9

ggccccgctaactacgtgccagcagccgcggaatacgtagggtgcgagcgttgcggagttactgggcgtaaacgcgcatgcagg  
cggctcattacgcacggcgtgaaagccccggcttaaccggggagggctcgtcgtgtacgggtgagcttaggggtatcaggggctggt  
ggaattcccgggtgtagtggtgaaatgcttagagatcgggaggaacacctgtggcgaaggcggccagctgggatacacctgacgct

gagatgcgaaggcgtggggagcgaacgggattagataccccggtagtcacgcagtaaacgatgcagactaggcgtgggagga  
ctgaccctccgtgccggagctaacgcgataagctgccgcctggggagtagcggtcgca

>GM2GI8201BC8L8

gccccggctaactacgtgccagcagccgcgtaatacgtaggaccgagcgtgtccggaatcattgggcgtaaagagtacgtagg  
cggtaagataagttagaagtaaaaggcaccggctcaaccggcgtaagctttaaaactgtttacttgagacattgagggggaagtgg  
aatttctagtagcggtagaatgvcgagatattaggaagaataccagaggcgaaagcgcacttctagcgcgatctgacgctgaggt  
acgaaagcgtgggaagcaaacaggattagataccctggtagtcacgcgtaaacgatgagtgtagatgtccgaggtaaactgg  
gtgvcggaagccaacgcgataaacactccgcctggggagtagcgcacgca

>GM2GI8201AOS8H

gtcacggctaactacgtgccagcagccgcgtaatacgtagggtggcgagcgttatccggaatgattgggcgtaaagggtagctagg  
ggctgttaagtctgaagtaaaagccggcagctcaactgtcgtacgctttggaaactggcaagctagagtgcaggagagggcgatgg  
aactccatgttagcggtaaaatgvcgtagatataatggaagaacaccagtgvcgaaagggcgtgcctggcctgcaactgacactgga  
agcacgaaagcgtggggagcaaataggattagataccctagtagtcacgcgtaaacgatgagaactaagtgtgggggaataa  
ctcagtgctgcagttaacgcaataagttctccgcctggggagtagcgcacgca

>GM2GI8201AMX2Q

gccccggctaactacgtgccagcagccgcgtaatacgtaggggcgagcgtgtccggaattattgggcgtaaagggtagctagg  
cggactgaaagttgacgtgaaagccggggcctaactccggcaagcgtgaaaactggagggcttgatgtaggaagggacagt  
ggaattcctggtgtagtggtgaaatgvcgagagatcaggaagaataccagtgvcgaaagggcactgtctggacattaactgacgctga  
ggtacgaaagcgtggggagcaaacaggatcagataccctggtagtcacgcgtaaacgatgagtgcaaggtgtgggggtcaaa  
cctcgggtgccgcttaacacagtaagcactccgcctggggagtagcgcacgca

>GM2GI8201B3DAY

ggtccggctaattacgtgccagcagccgcgtaatacgtaggaccgagcgtgtccggaatcattgggcgtaaagggtagctaggc  
ggtctagtaagtaggagtgaaatccaatagctcaactattgtaagcttctaaaactgctagactgagagattgagggggaagtggaa  
ttcctagtagtagcggtagaatgvcgagatattaggaggaataccagtgvcgaaagggcacttctggcaatcatctgacgctgaggtac  
gaaagcgtggtagcaaacaggattagataccctggtagtcacgcgtaaacgatgagtgtaggtgcctggtgtaaactgggtg  
ccgagcaaacgcattaaacactccgcctggggagtagcgcacgca

>GM2GI8201B5DO2

gccccggctaactacgtgccagcagccgcgtaatacgtaggggcgaagcgttatccggatttactgggtgtaaagggagcgtaga  
cggcatggcaagtctgatgtgaaaggcaggggtcaactcctggactgcattggaactgccaggcttgatgccggaggggtaag  
cggaaattcctagtagcggtagaatgvcgtagatattaggaggaacaccagtgvcgaaagggcgttactggacggtaactgacggtg  
aggctcgaagcgtggggagcaaacaggattagataccctggtagtcacgcgtaaacgatgaataactaggtgvcgggtgcaca  
gcaattcgggtgccgagcaaacgcaataagtattccacctggggagtagcgttcgca

>GM2GI8201CINU6

gccccggctaactacgtgccagcagccgcgtaatacgtaggggcgagcgtgtccggaatgattgggcgtaaagggtagctagg  
cggtcagaagggctgtgtgaaaagccggggctcaactccgggaggcgtggaactatcggacttgatgtagaagggacagt  
ggaattcctggtgtagtggtgaaatgvcgagagatcaggaagaataccggtgvcgaaagcgcactgtctggataccaactgacgctg

aggtacgaaagcgtgggtagcaaacaggattagataccctggtagtcacgccgtaaacgatgagtgctagacgtcgggtgtcaaa  
gcccgggtcgcgggtaaccagtaagcactccgcctggggagtagtacgca

>GM2GI8201AER69

gcccggctaactacgtgccagcagccgcggaatacgtaggggagcgttatccggatttattggcgtaaagggtagtagacgg  
cacaagaagctttgttaaattgtgggctcaaccaatctcgcaaaagaaactacttgagctagagtagcggtagaggcaagtgaat  
tccatgtgtagcggtaaaatgctgaaatataatggaggaacaccagtgccgaaggcggcttctgggctgactgacgttgaggcac  
gaaagcgtggggagcaaacaggattagataccctggtagtcacgccctaaacgatgagtagtaagtgtaccatttggtagtgctga  
agftaacgcattaagtagtccgcctgagtagtacgtagcga

>GM2GI8201AOWRR

gcaccggctaatacgtgccagcagccgcggaatacgtatggtgcaagcgttatccggattactgggtgtaaagggagtagtagc  
gttggtgtaagtctgatgtgaaaacccgggctcaacccgggactgcattggaaactatgcgactagagtagcggagaggtaagcgg  
aattcctagtgtagcggtagaatgctgtagatattaggaggaacaccagtgccgaaggcggcttactggacgatcactgacgttgagg  
ctcgaagcgtggggagcaaacaggattagataccctggtagtcacgccgtaaacgatgactactaggtgtcgggtagcaaagct  
attcgggtccgcagcaaacgcaataagtagtccacctggggagtagcttcgca

>GM2GI8201DWXLX

gccccggctaactacgtgccagcagccgcggaatacgtaggggagcgttgcgggaattattggcgtaaagggtagtagc  
ggacctaaaagttgacgtgaaagcccgggcttaaccccggtgagcgttaaaaactgcaggccttgagtggtagaagggatcgtg  
aattcctagtgtagcggtagaatgctgtagagattaggaagaataccagtgccgaagcgcgatctggataccaactgacgctgag  
gtacgaaagcgtggggagcaaacaggattagataccctggtagtcacgccgtaaacgatgagtgctagatgtcgggtgtcaaacg  
tcggtatccggttaacacattaagcactccgcctggggagtagtagcga

>GM2GI8201A9ULM

gccccggctaactacgtgccagcagccgcggaatacgtaggggagcgttgcgggaattattggcgtaaagggtagtagc  
cggacctaaaagttgacgtgaaagcccgggcttaaccccggtgagcgttaaaaactgcaggccttgagtggtagaagggatcgtg  
gaattcctagtgtagcggtagaatgctgtagagattaggaagaataccagtgccgaagcgcgatctggataccaactgacgctga  
ggtagcaaagcgtggggagcaaacaggattagataccctggtagtcacgcgtgtaaacgatgagtgcaaggtgtgggggtcaaac  
ctcgtgcccggcttaacacagtaagcactccgcctggggagtagtagcga

>GM2GI8201BQUXR

gccacggctaactacgtgccagcagccgcggaatacgtaggtggcaagcgttgcgggattactggcgtaaagggagcgttag  
cggatttttaagttagatgtgaaataccgggcttaactgggtgctgattcaaaactggaagttagagtagcaggagaggagaagg  
gaattcctagtgtagcggtagaatgctgtagagattaggaagaacaccagtgccgaaggcgttctctgactgtaactgacgctgag  
gctcgaagcgtggggagcaaacaggattagataccctggtagtcacgccgtaaacgatgaataactaggttaggggtgtcatga  
cctctgtccgcttaacacattaagtagtccgcctggggagtagtagcga

>GM2GI8201DUZC3

gcaccggctaactacgtgccagcagccgcggaatacgtaggggcaagcgttatccggattactgggtgtaaagggcagtagac  
gggattttaagtagatgtgaaaacttagggctcaaccttaagactgcatctaaaactgatttcttgagtgtgagaggtaagcggaat  
tcttagtagcgggtggaatgtgtagatattaggaagaacaccagtgccgaaggcggcttactggacagtaactgacgttgaggcgc

gaaagtgtgggagcaaacaggattagataccctggtagtccacaccgtaaacgatggatactaggtgttgcaagcgattgtcagt  
gccggcgctaacgcaataagtatcccacctggggagtagcaccgca

>GM2GI8201DYVYY

ggatcggctaactccgtgccagcagccgcggaatacggaggatccaagcgttatccggattattggttaaagggagcgttaggcg  
gaagttaagtcagttgtgaaagttgcggtcaccgtaaaattgcagttgatactggatttctgagtgcgggatagggcagggcgaattc  
gtggtgtagcggtgaaatgcttagatcacgaagaactccaattgcgaagcagcttgctggaccgtaactgacgctgatgctcgaa  
agtgcgggtatcaaacaggattagataccctggtagtccgcacagtaaacgatgaatactgctgttggcgatatacagtcagcggcc  
aagcgaagcattaagtattccacctggggagtagcggcgca

>GM2GI8201ARFYS

gcgacggctaatacgtgccagcagccgcggaatacgtatgtcgcaagcgttatccggattattggcgtaaacgagcgtctaggtgt  
ttgtaagctgtgtgaaatgccccggtcaactccgtattcggttgaaactgcaaactagagtaggagggggcgaact  
acaagtagtagggtgaaatcgttagatattgttagaatgccgatggagaagtcagcccactggacagatactgacgctgaagcgg  
aaagcgtggtagcaaacaggattagataccctggtagtccacgctgtaaacgatgattactaggtgttgggggtcgaacctcagc  
ccaagctaacgcgataagtaatccgcctggggagtagcgtacgca

>GM2GI8201DPUQN

gcaccggctaactacgtgccagcagccgcggaatacgtagggtgagcgttgcgggaattactggcgtaaacgagcgtctaggt  
ggtgtgctgcgtctgtgaaattccggggcttaactcgggcgtgcaggcgatacgggcatacttgagtgtcttaggggagactgga  
attcctggtgtagcggtgaaatgctgagatcaggaggaacaccgatggcgaaggcaggtctctgggcagttactgacgctgagg  
agcgaagcatggtagcgaacaggattagataccctggtagtccatgccgtaaacggtggcgctaggtgttagggggctccacg  
tctctgtgccgtagctaacgcattaagcgcctggggagtagcggcgca

>GM2GI8201A4KUJ

gccccggctaactacgtgccagcagccgcggaatacgtaggggcgagcgttgcgggaattattggcgtaaacgggtacgtagg  
cggcttttaagttgacgtgaaagccccgggcttaactccggcaagcgttgaaaactggagggcttgagtgtggaagggacagtgg  
aattcctggtgtagtggtgaaatgctgagagatcaggaagaataccagtgccgaaggcagctgtctggacattaactgacgctgagg  
tacgaaagcgtggggagcaaacaggattagataccctggtagtccacgcagtaaacgatgaatactgatgtagggaggtatcgacc  
ccttctgtgcgaagttaacgtattaagtattccacctggggagtagcggcgca

>GM2GI8201CPQB2

gcaccggctaactcgtgccagcagccgcggaatacggaggggtgcaagcgttaacgggaattactggcgtaaacgagcagcagc  
cggtttgaagtcagatgtgaaatccccgggctcaactgggaactgcatctgatactggcaagcttgagtctcgtagaggggtaga  
attccaggtgtagcggtgaaatgctgagagatctggaggaataccggtggcgaaggcggccccctggacgaagactgacgctcag  
gtgcgaaagcgtggggagcaaacaggattagataccctggtagtccacgcctgaaacgatgctgactggaggggtgtgcccttgagg  
cgtggctccggagctaacgcgttaagtcgaccgctggggagtagcggcgca

>GM2GI8201BW5XP

ggatcggctaactccgtgccagcagccgcggaatacggaggatccgagcgttatccggattattgggttaaacgggagcgttaggtg  
actggaagtcagttgtgaaagttgcggtcaaccgtaaaattgcagttgatactgctcagcttgagtacagtagaggtggcggaatt  
cgtggtgtagcggtgaaatgcttagatcacgaagaactccgattgcgaaggcagctcactggactgcaactgacactgatgctcga

aagtgtgggtatcaaacaggattagataccctggtagtccacacagtaaacgatgaatactcgctgtttgcatatacagtaagcggc  
caagcgaaagcattaagtattccacctggggagtacgccggca

>GM2GI8201BN1R8

gccacggctaactcgtgccagcagccgcggaatacgtaggtaggcaagcgttatccggaattattgggcgtaaagcgcgcgtaggc  
ggtttttaagtctgatgtgaaagcccacggctcaaccgtggagggtcattggaaactggaaaactgagtgacagaagaggaaagtg  
gaattccatgtgtagcgggtgaaatgcgagagatatggaggaacaccagtggcgaaggcgacttctggtctgtaactgacgctgatg  
tgcgaaagcgtggggatcaaacaggattagataccctggtagtccacgccgtaaacgatgagtgctaagtgttagggggttccgcc  
ccttagtgctgcagctaacgcattaagcactccgcctggggagtacgccggca



## References

- 1 Ezaki, T. *et al.* Proposal of the genera *Anaerococcus* gen. nov., *Peptoniphilus* gen. nov. and *Gallicola* gen. nov. for members of the genus *Peptostreptococcus*. *Int. J. Syst. Evol. Microbiol.* 51, 1521-1528 (2001).
- 2 Ezaki, T., Li, N. & Kawamura, Y. The anaerobic gram-positive cocci. *Prokaryotes* 4, 795-808 (2006).
- 3 Bernard, K. A., Munro, C., Wiebe, D. & Ongsansoy, E. Characteristics of Rare or Recently Described *Corynebacterium* Species Recovered from Human Clinical Material in Canada. *J. Clin. Microbiol.* 40, 4375-4381, doi:10.1128/jcm.40.11.4375-4381.2002 (2002).
- 4 Matthies, C., Evers, S., Ludwig, W. & Schink, B. *Anaerovorax odorimutans* gen. nov., sp. nov., a putrescine-fermenting, strictly anaerobic bacterium. *Int. J. Syst. Evol. Microbiol.* 50, 1591-1594 (2000).
- 5 Wade, W. G. The genus *Eubacterium* and related genera. *Prokaryotes* 4, 823-835 (2006).
- 6 Falsen, E. *et al.* *Fastidiosipila sanguinis* gen. nov., sp. nov., a new gram-positive, coccus-shaped organism from human blood. *Int. J. Syst. Evol. Microbiol.* 55, 853-858 (2005).
- 7 Collins, M. D., Facklam, R. R., Rodrigues, U. M. & Ruoff, K. L. Phylogenetic analysis of some aerococcus-like organisms from clinical sources: description of *Helcococcus kunzii* gen. nov., sp. nov. *Int. J. Syst. Bacteriol.* 43, 425-429, doi:10.1099/00207713-43-3-425 (1993).
- 8 Collins, M. D., Falsen, E., Brownlee, K. & Lawson, P. A. *Helcococcus sueciensis* sp. nov., isolated from a human wound. *Int. J. Syst. Evol. Microbiol.* 54, 1557-1560, doi:10.1099/ijs.0.63077-0 (2004).
- 9 Gibson, F. C. & Genco, C. A. The genus *Porphyromonas*. *Prokaryotes* 7, 428-454 (2006).
- 10 Stackebrandt, E., Cummins, C. S. & Johnson, J. L. Family Propionibacteriaceae: The Genus *Propionibacterium*. *Prokaryotes* 3, 400-418 (2006).
